# Supplementary material for: Diastereoselective C-alkylation of aldimines, derived from chiral α-carbon heteroatom-substituted aldehydes, with triethylborane. Application to the synthesis of benzylisoquinolines
Source: Royal Society of Chemistry journal article supplement (doi:10.1039/d3ra01397a), 2023-01-01
Supplement: d3ra01397a1.pdf [file d3ra01397a1.pdf]

## SUPPORTING INFORMATION

### **Diastereoselective C-Alkylation of Aldimines, Derived from Chiral $\alpha$ -Carbon Heteroatom-Substituted Aldehydes, with Triethylborane. Application to the Synthesis of Benzylisoquinolines**

David Fuentes-Ríos,<sup>a</sup> Carmen Muñoz,<sup>a</sup> Amelia Díaz,<sup>\*a</sup> Francisco Sarabia,<sup>a</sup> and J. Manuel López-Romero<sup>\*a</sup>

*Department of Organic Chemistry, Faculty of Sciences, University of Malaga, Campus de Teatinos s/n, 29071-Málaga, SPAIN.*

# TOC

|                                                                                                 |    |
|-------------------------------------------------------------------------------------------------|----|
| <sup>1</sup> H NMR (400 MHz, CDCl <sub>3</sub> ) of compound <b>6</b> major diastereomer        | 3  |
| <sup>13</sup> C NMR (100 MHz, CDCl <sub>3</sub> ) of compound <b>6</b> major diastereomer       | 4  |
| <sup>1</sup> H NMR (400 MHz, CDCl <sub>3</sub> ) of compound <b>7</b> minor diastereomer        | 5  |
| <sup>13</sup> C NMR (100 MHz, CDCl <sub>3</sub> ) of compound <b>7</b> minor diastereomer       | 6  |
| <sup>1</sup> H NMR (400 MHz, CDCl <sub>3</sub> ) of compound <b>7</b> major diastereomer        | 7  |
| <sup>13</sup> C NMR (100 MHz, CDCl <sub>3</sub> ) of compound <b>7</b> major diastereomer       | 8  |
| <sup>1</sup> H NMR (400 MHz, CDCl <sub>3</sub> ) of compound <b>8</b> major diastereomer        | 9  |
| <sup>13</sup> C NMR (100 MHz, CDCl <sub>3</sub> ) of compound <b>8</b> major diastereomer       | 10 |
| <sup>1</sup> H NMR (400 MHz, CDCl <sub>3</sub> ) of compound <b>9</b> major diastereomer        | 11 |
| <sup>13</sup> C NMR (100 MHz, CDCl <sub>3</sub> ) of compound <b>9</b> major diastereomer       | 12 |
| <sup>1</sup> H NMR (400 MHz, CDCl <sub>3</sub> ) of compound <b>13</b> minor diastereomer       | 13 |
| <sup>13</sup> C NMR (100 MHz, CDCl <sub>3</sub> ) of compound <b>13</b> minor diastereomer      | 14 |
| <sup>1</sup> H NMR (400 MHz, CDCl <sub>3</sub> ) of compound <b>14</b> major diastereomer       | 15 |
| <sup>13</sup> C NMR (100 MHz, CDCl <sub>3</sub> ) of compound <b>14</b> major diastereomer      | 16 |
| <sup>1</sup> H NMR (400 MHz, CDCl <sub>3</sub> ) NOE for compound <b>6</b> major diastereomer   | 17 |
| <sup>1</sup> H NMR (400 MHz, CDCl <sub>3</sub> ) NOE for compound <b>6</b> major diastereomer   | 18 |
| <sup>1</sup> H NMR (400 MHz, CDCl <sub>3</sub> ) NOE for compound <b>6</b> major diastereomer   | 19 |
| <sup>1</sup> H NMR (400 MHz, CDCl <sub>3</sub> ) NOESY for compound <b>6</b> major diastereomer | 20 |
| Stereochemistry and observed NOE for compound <b>6</b> major diastereomer                       | 21 |
| <sup>1</sup> H NMR (400 MHz, CDCl <sub>3</sub> ) NOE for compound <b>7</b> minor diastereomer   | 22 |
| <sup>1</sup> H NMR (400 MHz, CDCl <sub>3</sub> ) NOE for compound <b>7</b> minor diastereomer   | 23 |
| <sup>1</sup> H NMR (400 MHz, CDCl <sub>3</sub> ) NOE for compound <b>7</b> minor diastereomer   | 24 |
| <sup>1</sup> H NMR (400 MHz, CDCl <sub>3</sub> ) NOESY for compound <b>7</b> minor diastereomer | 25 |
| Stereochemistry and observed NOE for compound <b>7</b> minor diastereomer                       | 26 |
| <sup>1</sup> H NMR (400 MHz, CDCl <sub>3</sub> ) NOE for compound <b>7</b> major diastereomer   | 27 |
| <sup>1</sup> H NMR (400 MHz, CDCl <sub>3</sub> ) NOE for compound <b>7</b> major diastereomer   | 28 |
| <sup>1</sup> H NMR (400 MHz, CDCl <sub>3</sub> ) NOE for compound <b>7</b> major diastereomer   | 29 |
| <sup>1</sup> H NMR (400 MHz, CDCl <sub>3</sub> ) NOESY for compound <b>7</b> major diastereomer | 30 |
| Stereochemistry and observed NOE for compound <b>7</b> major diastereomer                       | 31 |
| <sup>1</sup> H NMR (400 MHz, CDCl <sub>3</sub> ) NOE for compound <b>9</b> major diastereomer   | 32 |
| <sup>1</sup> H NMR (400 MHz, CDCl <sub>3</sub> ) NOE for compound <b>9</b> major diastereomer   | 33 |
| <sup>1</sup> H NMR (400 MHz, CDCl <sub>3</sub> ) NOE for compound <b>9</b> major diastereomer   | 34 |
| <sup>1</sup> H NMR (400 MHz, CDCl <sub>3</sub> ) NOE for compound <b>9</b> major diastereomer   | 35 |
| <sup>1</sup> H NMR (400 MHz, CDCl <sub>3</sub> ) NOESY for compound <b>9</b> major diastereomer | 36 |
| Stereochemistry and observed NOE for compound <b>9</b> major diastereomer                       | 37 |
| <sup>1</sup> H NMR (500 MHz, CDCl <sub>3</sub> ) of compound <b>11</b> major diastereomer       | 38 |
| <sup>13</sup> C NMR (126 MHz, CDCl <sub>3</sub> ) of compound <b>11</b> major diastereomer      | 39 |
| GC-MS of compound <b>11</b> major diastereomer                                                  | 40 |
| <sup>1</sup> H NMR (500 MHz, CDCl <sub>3</sub> ) of borane <b>20</b>                            | 41 |
| <sup>1</sup> H NMR (500 MHz, CDCl <sub>3</sub> ) of (±)-Romneine                                | 42 |
| <sup>13</sup> C NMR (126 MHz, CDCl <sub>3</sub> ) of (±)-Romneine                               | 43 |
| GC-MS of (±)-Romneine                                                                           | 44 |

**6** major

$^1\text{H}$  NMR (400 MHz,  $\text{CDCl}_3$ )

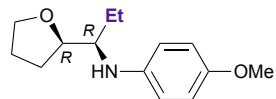

7.24

6.72  
6.63

3.85  
3.83  
3.83  
3.81  
3.72  
3.26  
3.25  
3.25  
3.25  
3.24  
3.23  
3.23  
3.22  
1.86  
1.73  
1.72  
1.72  
1.71  
1.70  
1.69  
1.69  
1.44  
1.43  
1.42  
1.41  
0.96  
0.94

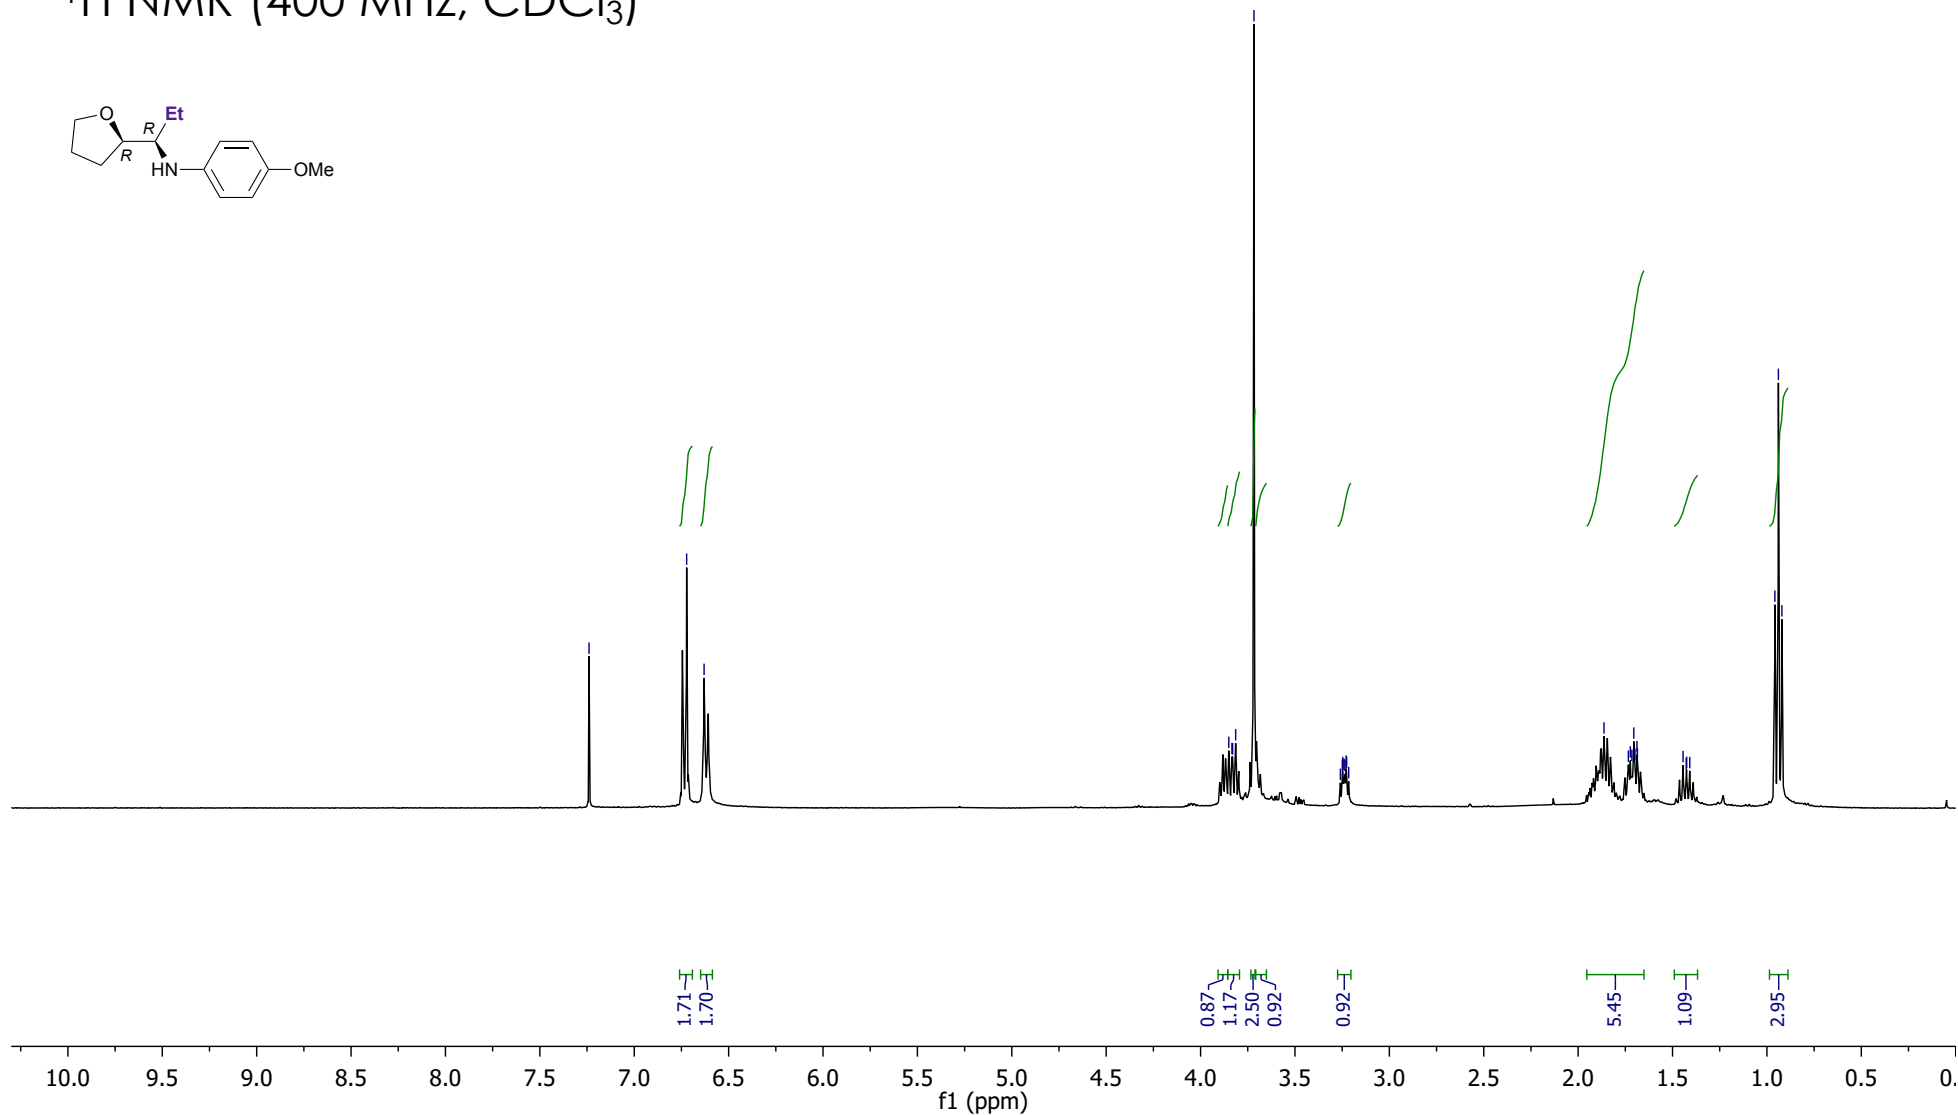

$^1\text{H}$  NMR (400 MHz,  $\text{CDCl}_3$ ) of compound **6** major diastereomer

**6** major

$^{13}\text{C}$  NMR (100 MHz,  $\text{CDCl}_3$ )

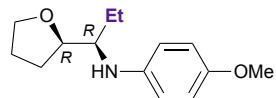

— 152.08

— 141.97

— 114.78

— 81.08

— 68.23

— 59.59

— 55.74

— 27.90

— 25.85

— 24.29

— 10.41

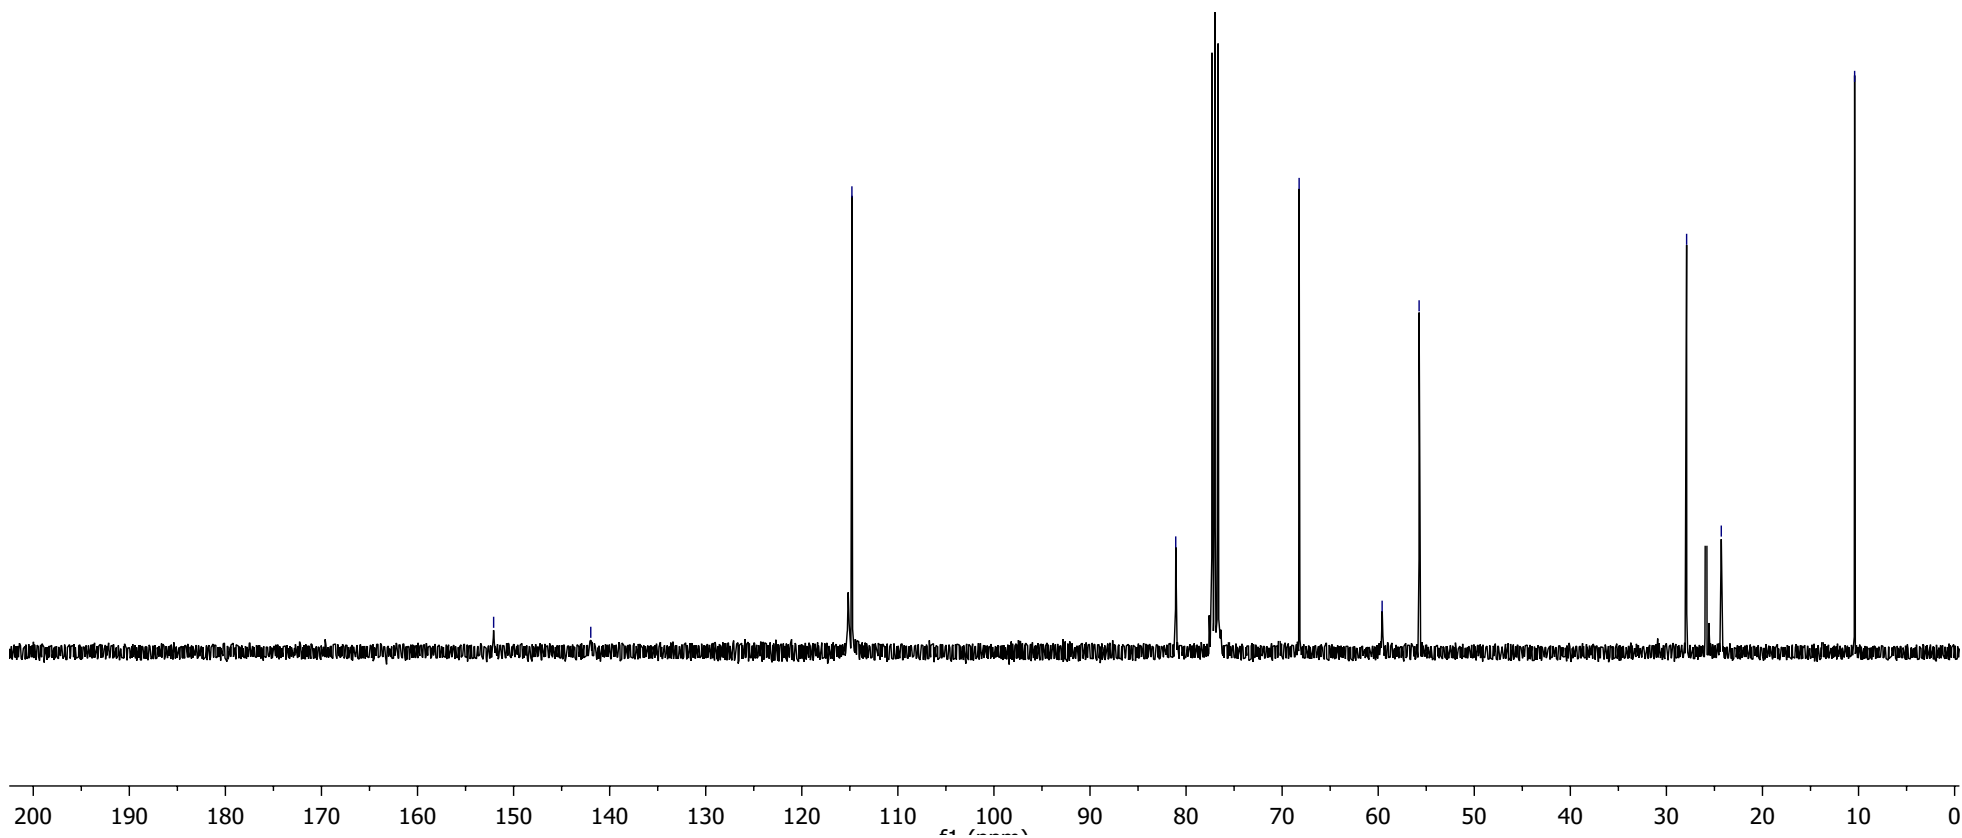

$^{13}\text{C}$  NMR (100 MHz,  $\text{CDCl}_3$ ) of compound **6** major diastereomer

7 minor

$^1\text{H}$  NMR (400 MHz,  $\text{CDCl}_3$ )

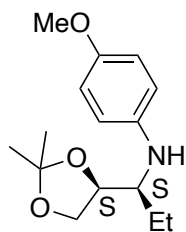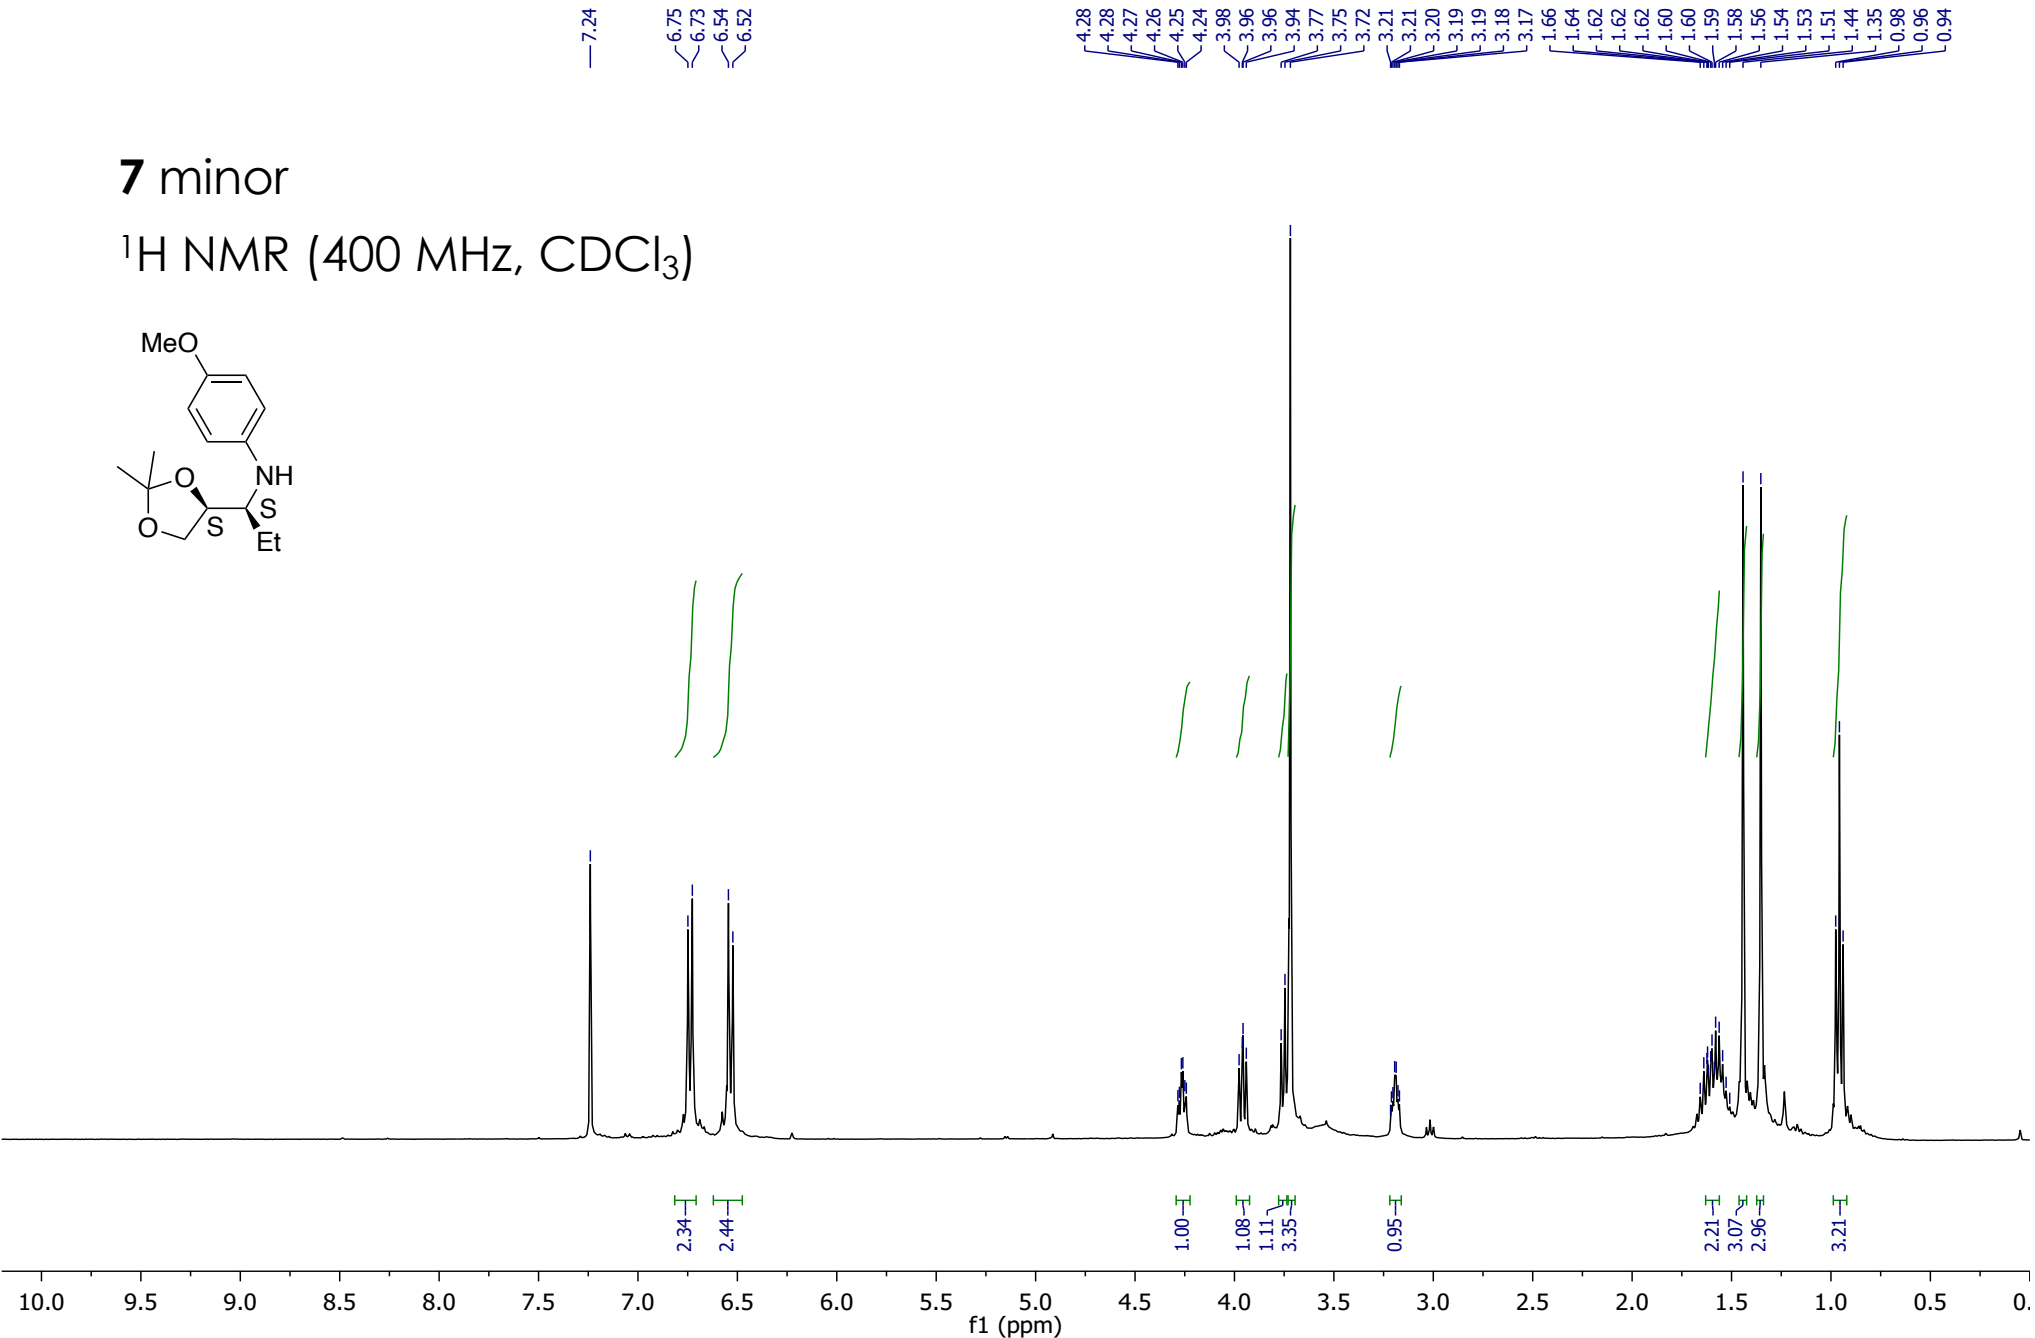

$^1\text{H}$  NMR (400 MHz,  $\text{CDCl}_3$ ) of compound 7 minor diastereomer

**7** minor

$^{13}\text{C}$  NMR (100 MHz,  $\text{CDCl}_3$ )

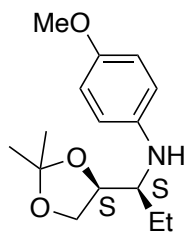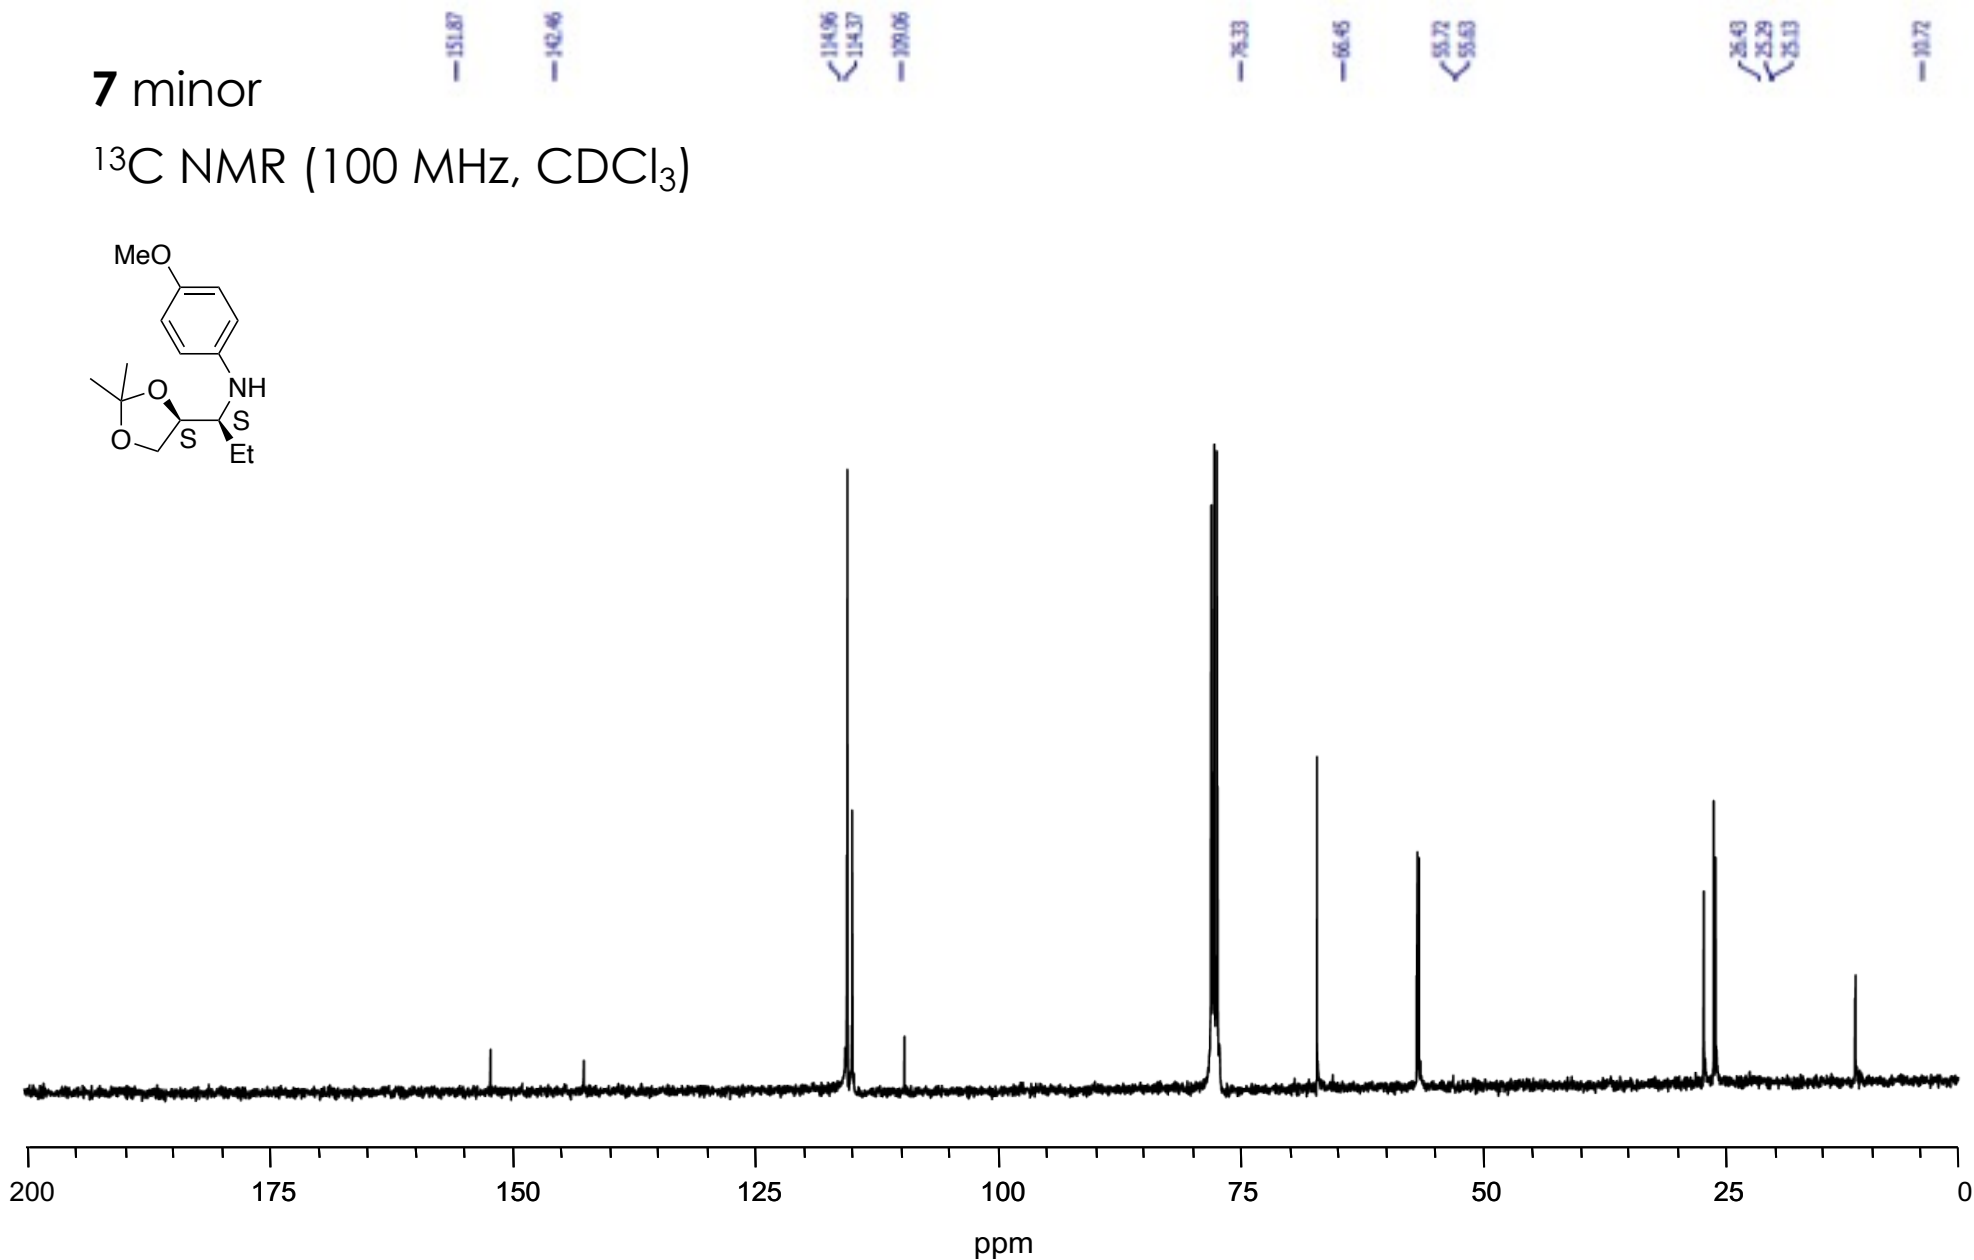

7 major

$^1\text{H}$  NMR (400 MHz,  $\text{CDCl}_3$ )

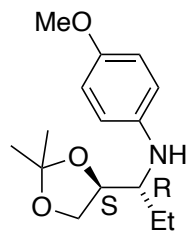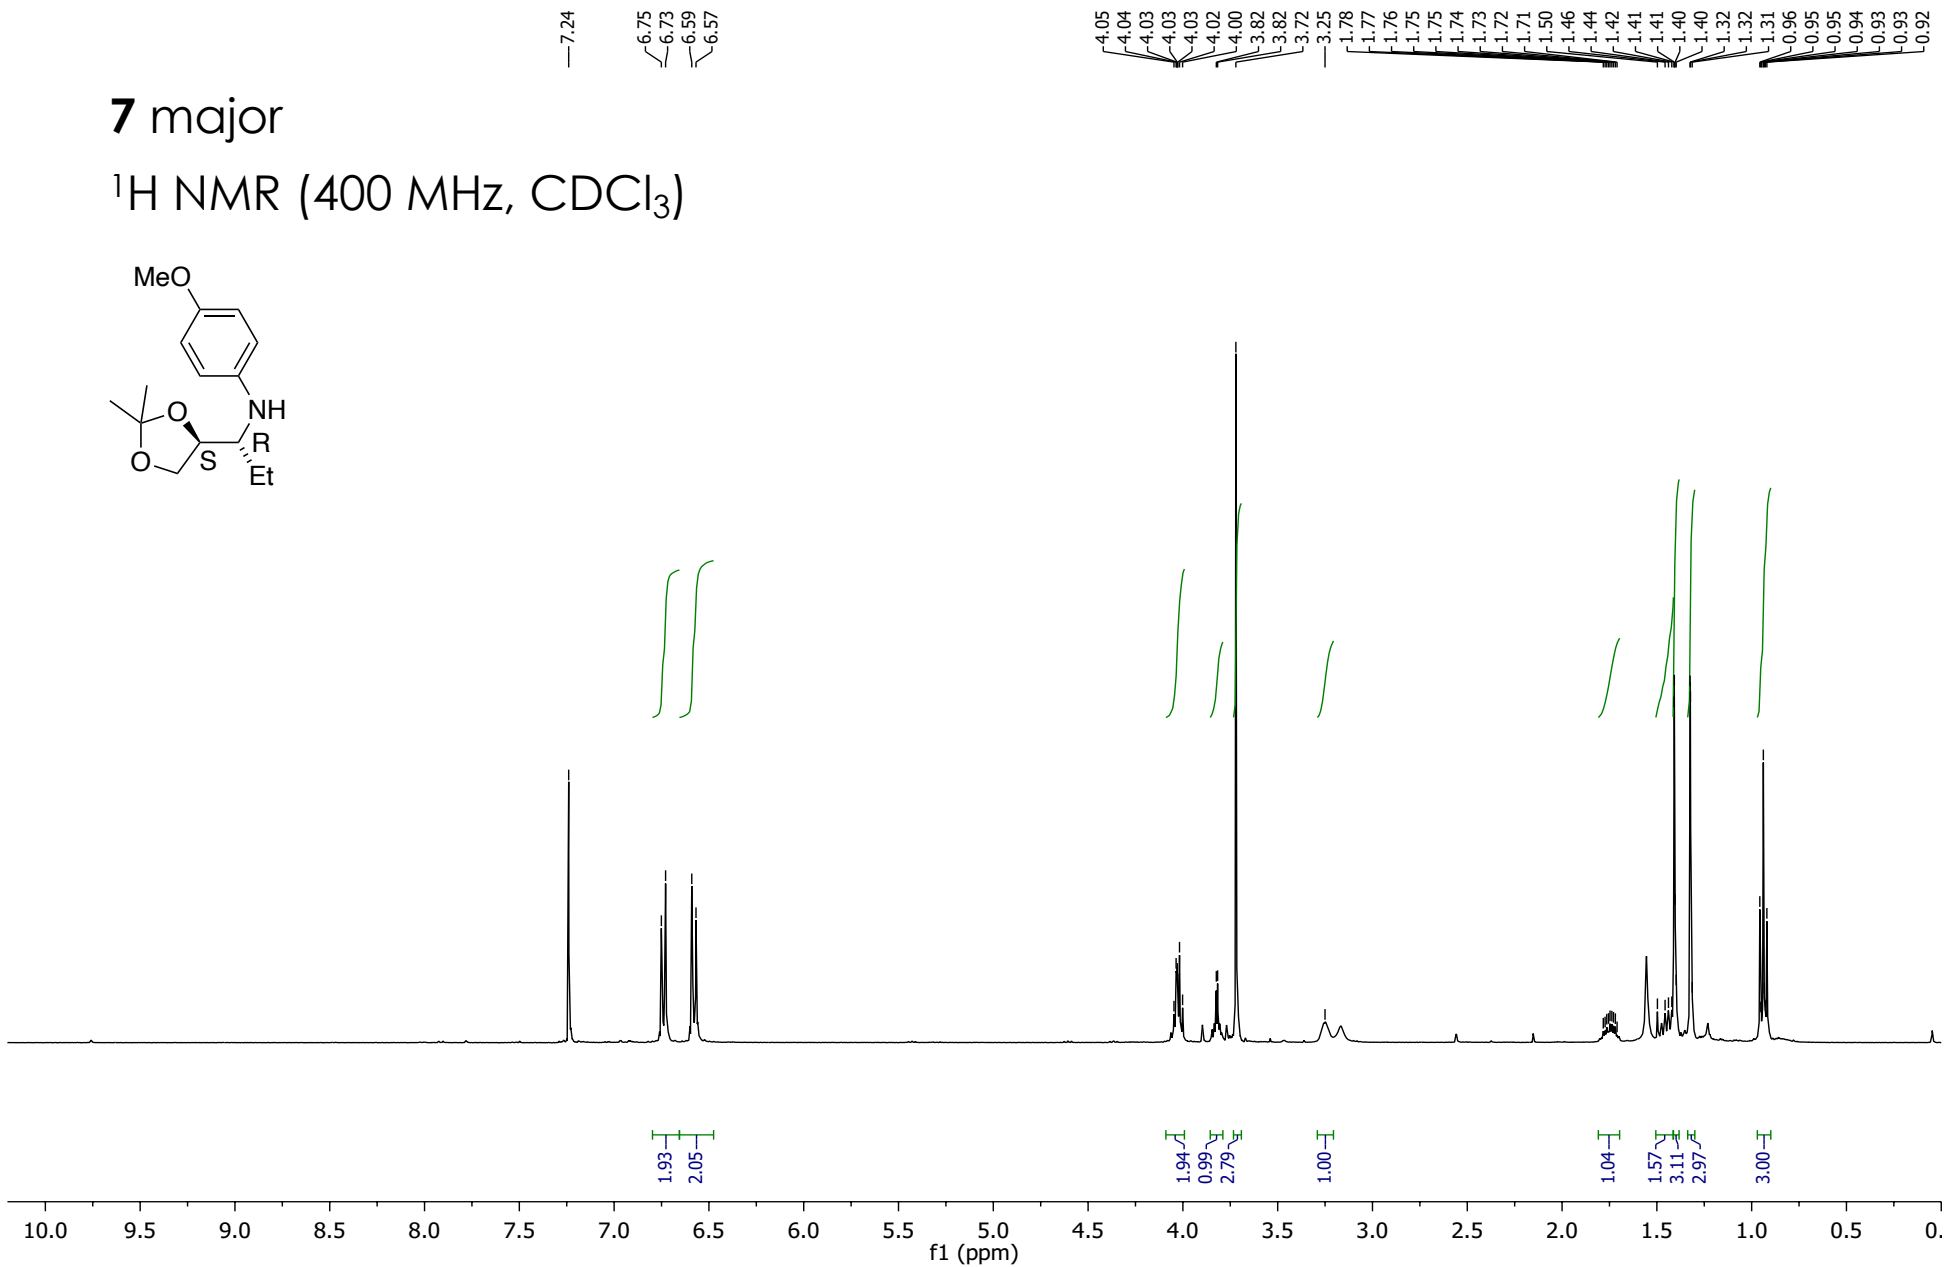

$^1\text{H}$  NMR (400 MHz,  $\text{CDCl}_3$ ) of compound 7 major diastereomer

**7** major

$^{13}\text{C}$  NMR (100 MHz,  $\text{CDCl}_3$ )

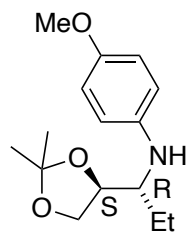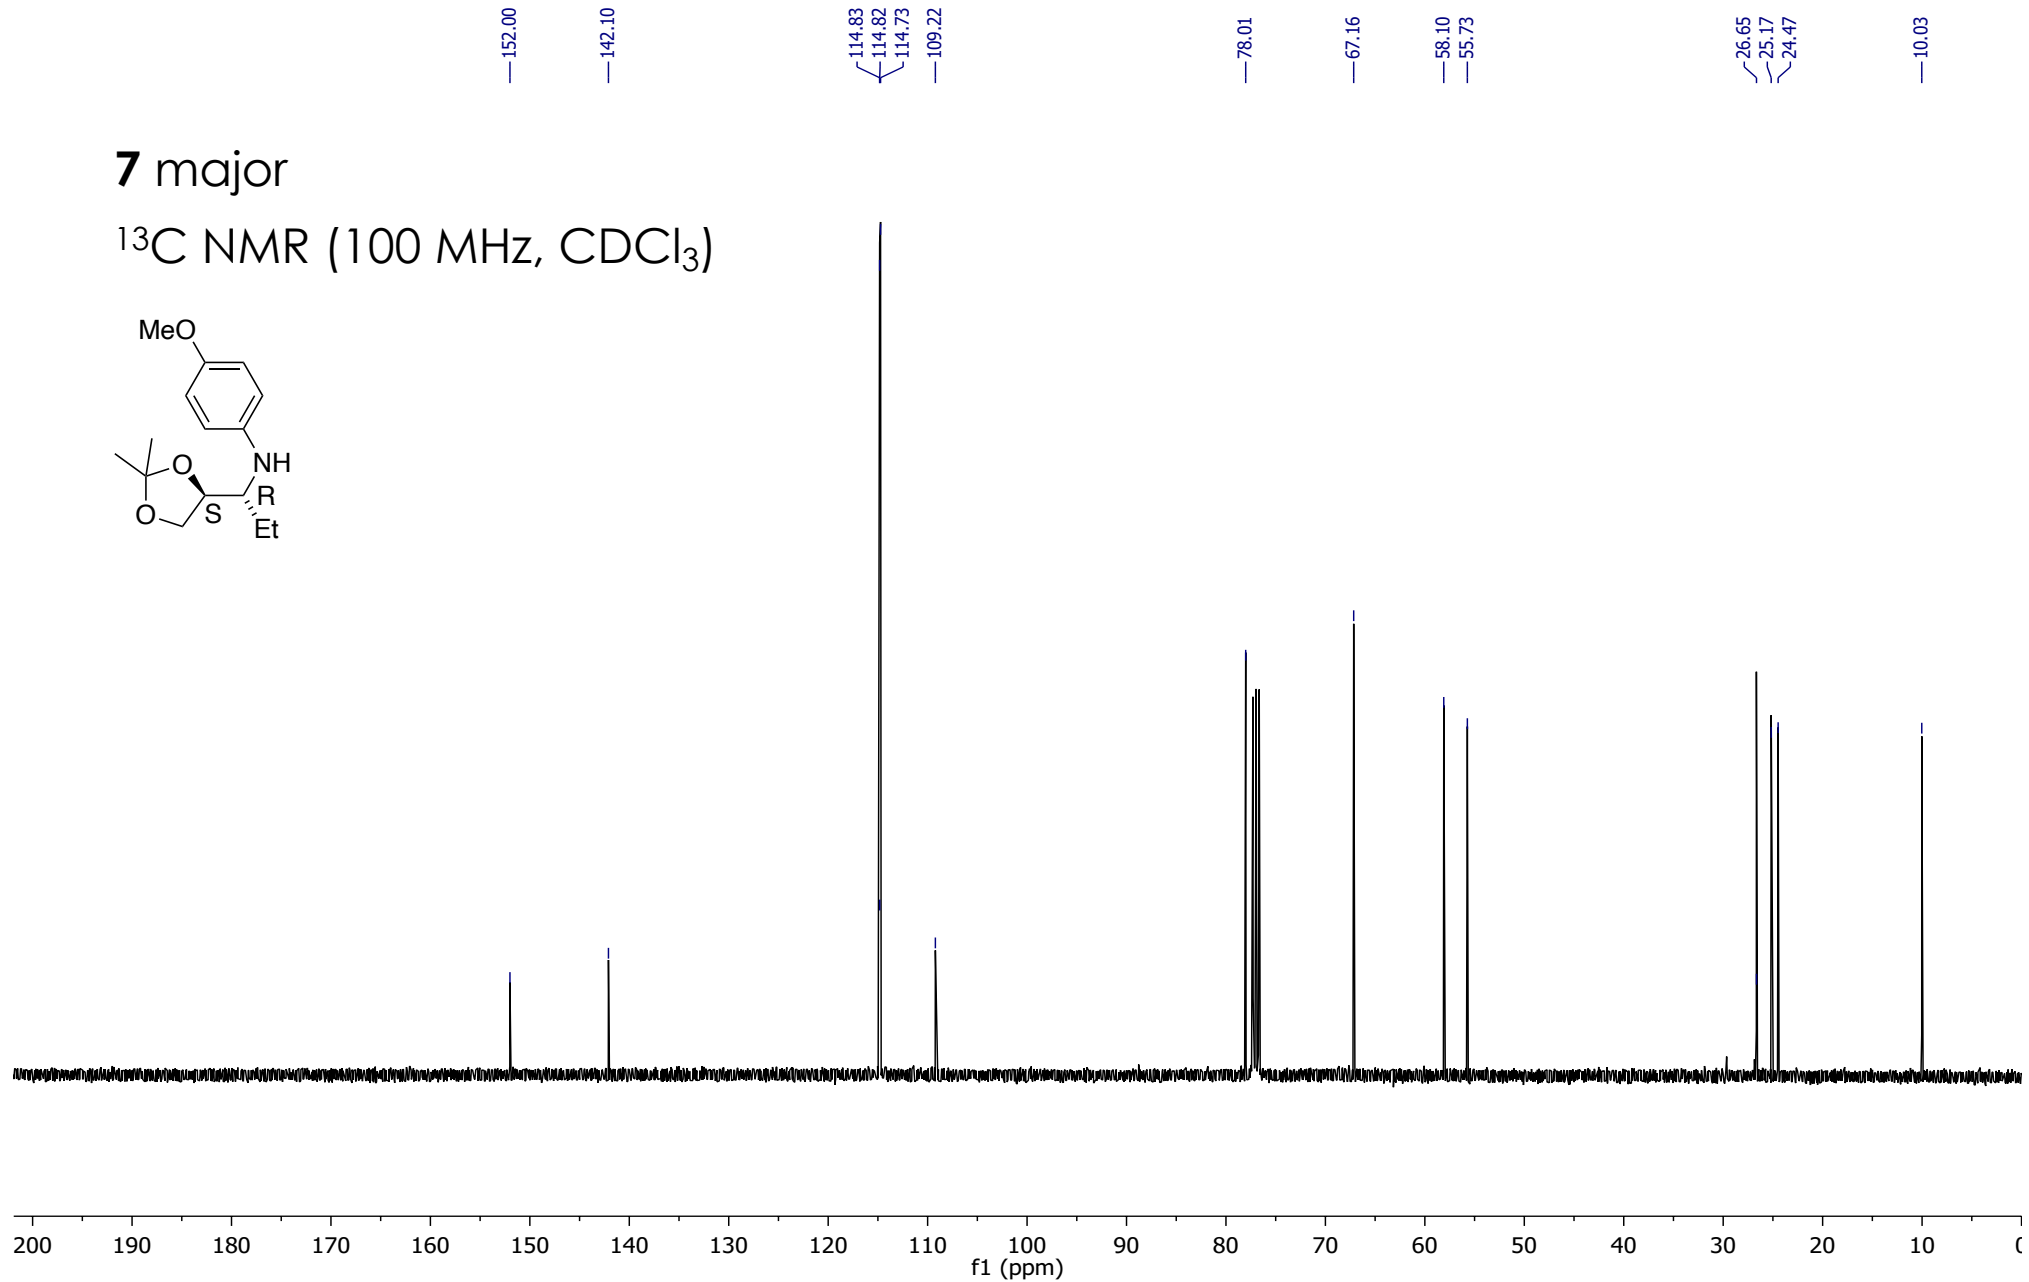

$^{13}\text{C}$  NMR (100 MHz,  $\text{CDCl}_3$ ) of compound **7** major diastereomer



7.33  
7.33  
7.32  
7.31  
7.30  
7.30  
6.75  
6.70  
6.51  
6.47

4.07  
4.00  
3.72  
3.44  
3.37  
3.16  
2.95  
2.93  
2.91  
2.89

2.27  
2.23  
2.19  
2.15  
2.15  
1.86  
1.82  
1.79  
1.78  
1.76  
1.66  
1.64  
1.63  
1.60  
1.49  
1.45  
1.42  
1.38  
0.99  
0.91

**8** major

$^1\text{H}$  NMR (400 MHz,  $\text{CDCl}_3$ )

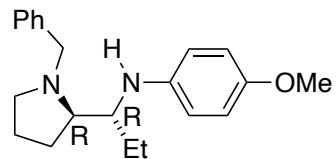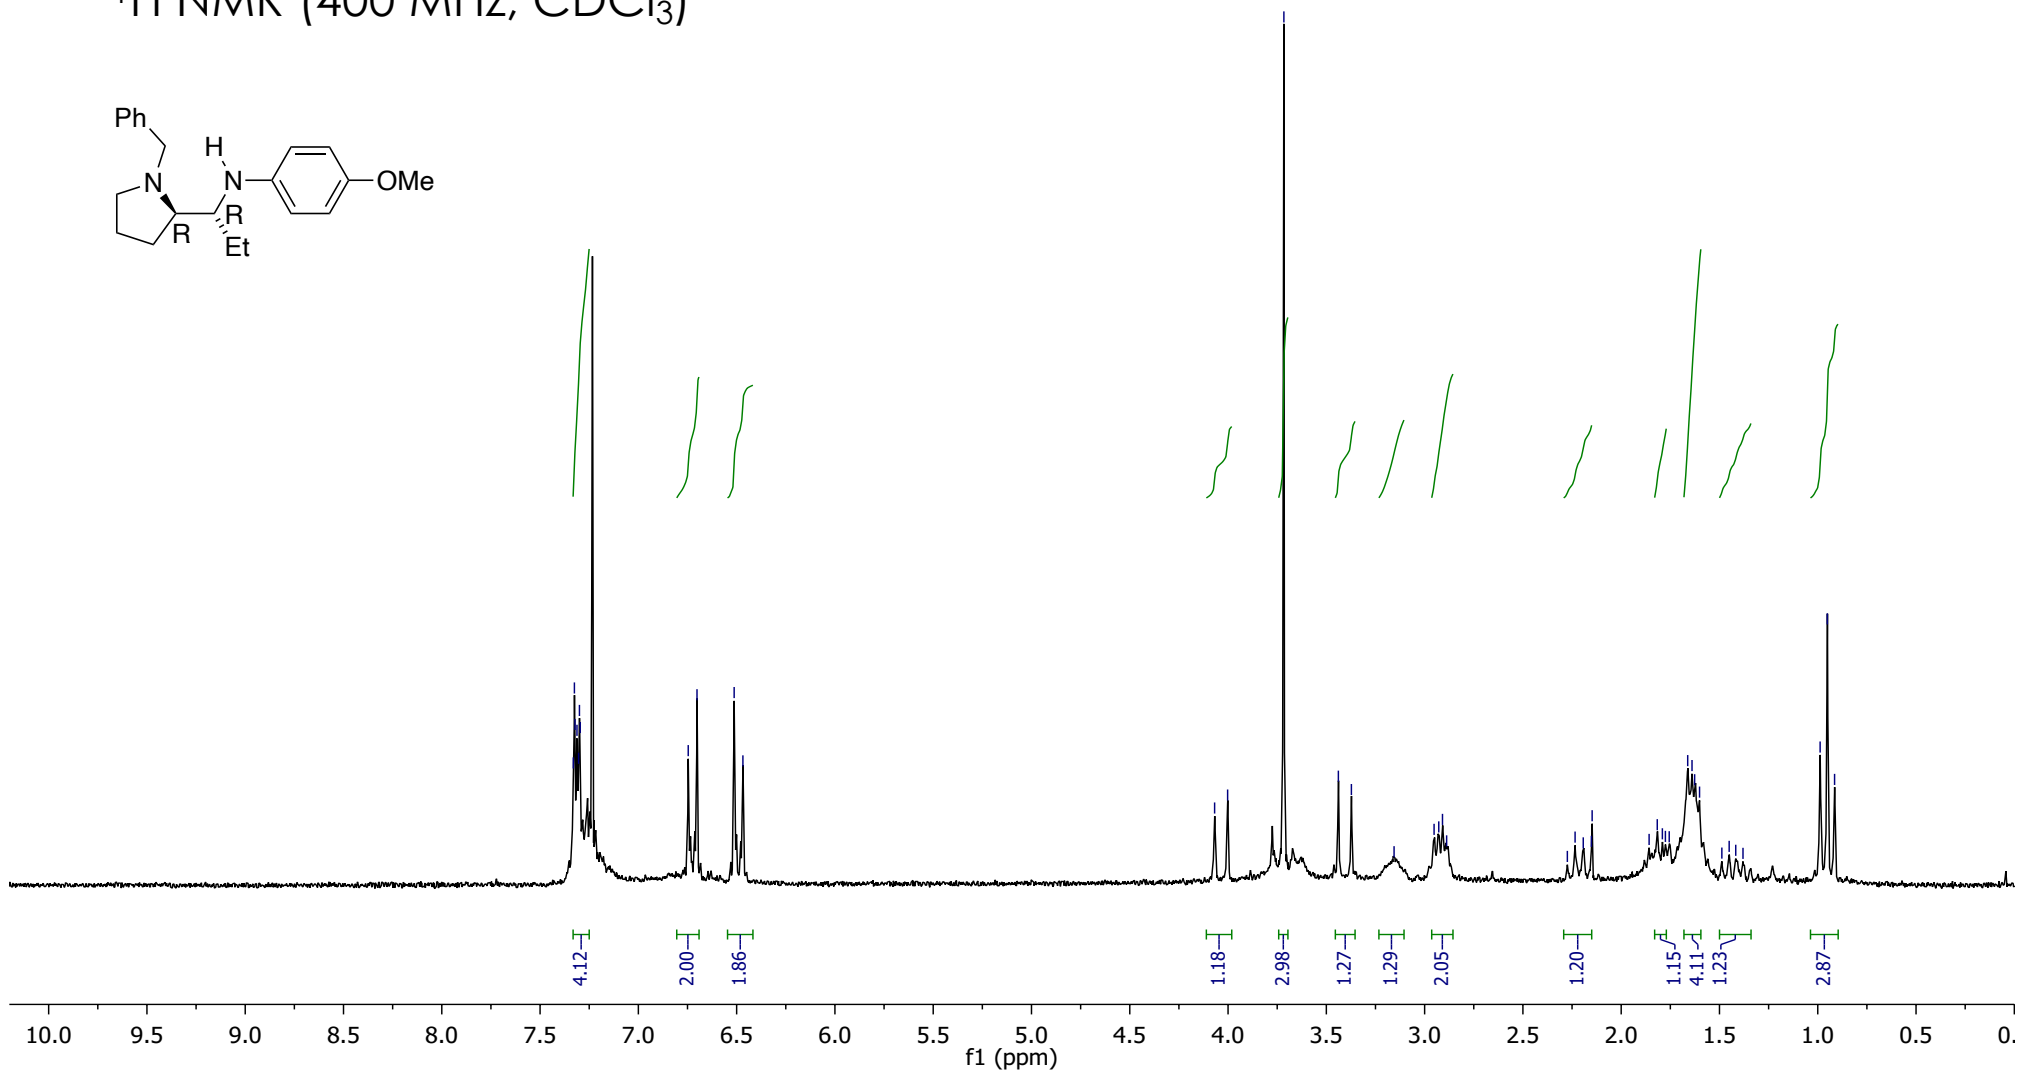

$^1\text{H}$  NMR (400 MHz,  $\text{CDCl}_3$ ) of compound **8** major diastereomer

**8** major

$^{13}\text{C}$  NMR (100 MHz,  $\text{CDCl}_3$ )

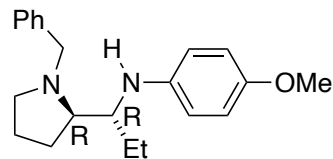

—151.26

—143.01

—140.32

—128.49

—128.19

—126.80

—114.92

—113.91

—65.21

—60.78

—58.66

—55.84

—55.48

—27.82

—24.44

—24.03

—11.51

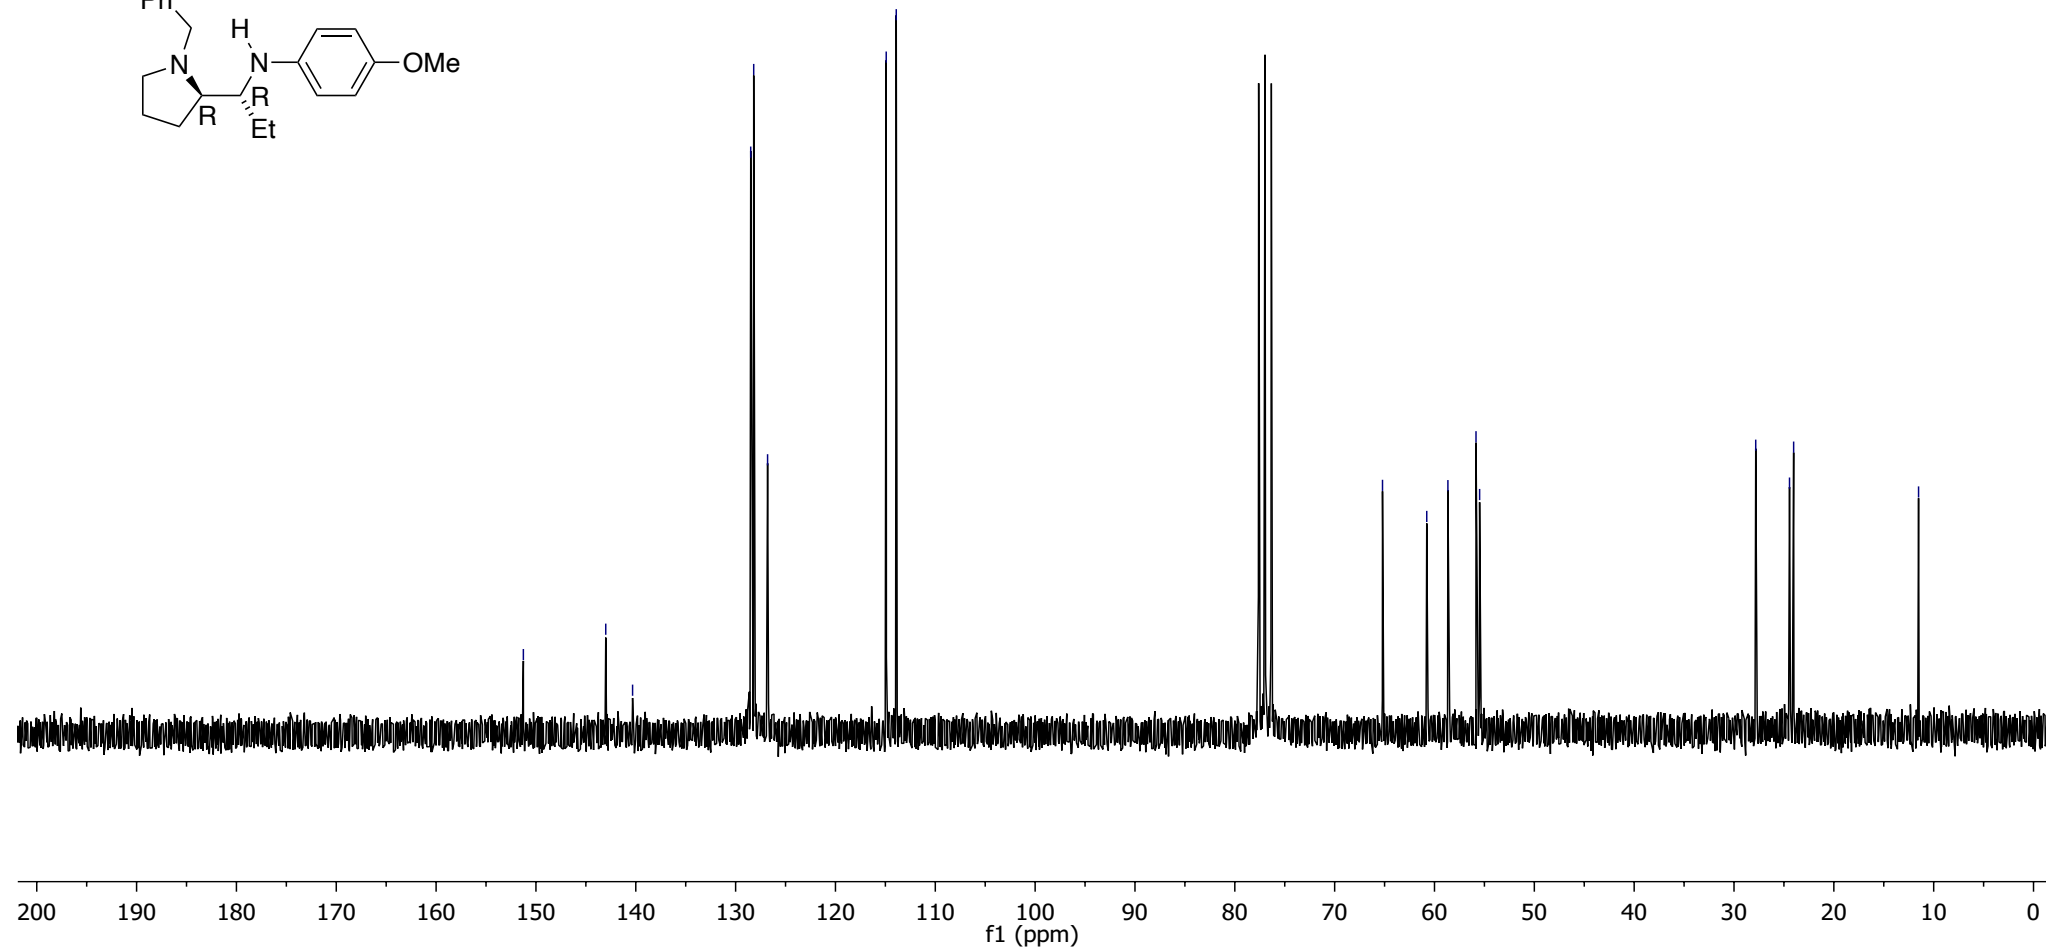

$^{13}\text{C}$  NMR (100 MHz,  $\text{CDCl}_3$ ) of compound **8** major diastereomer

9 major

$^1\text{H}$  NMR (400 MHz,  $\text{CDCl}_3$ )

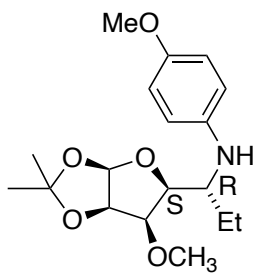

7.24  
6.75  
6.71  
6.63  
6.59  
5.89  
5.87  
4.53  
4.51  
3.96  
3.95  
3.92  
3.90  
3.72  
3.67  
3.66  
3.19  
1.93  
1.91  
1.89  
1.87  
1.86  
1.84  
1.82  
1.80  
1.78  
1.77  
1.53  
1.49  
1.48  
1.45  
1.31  
0.97  
0.93  
0.89

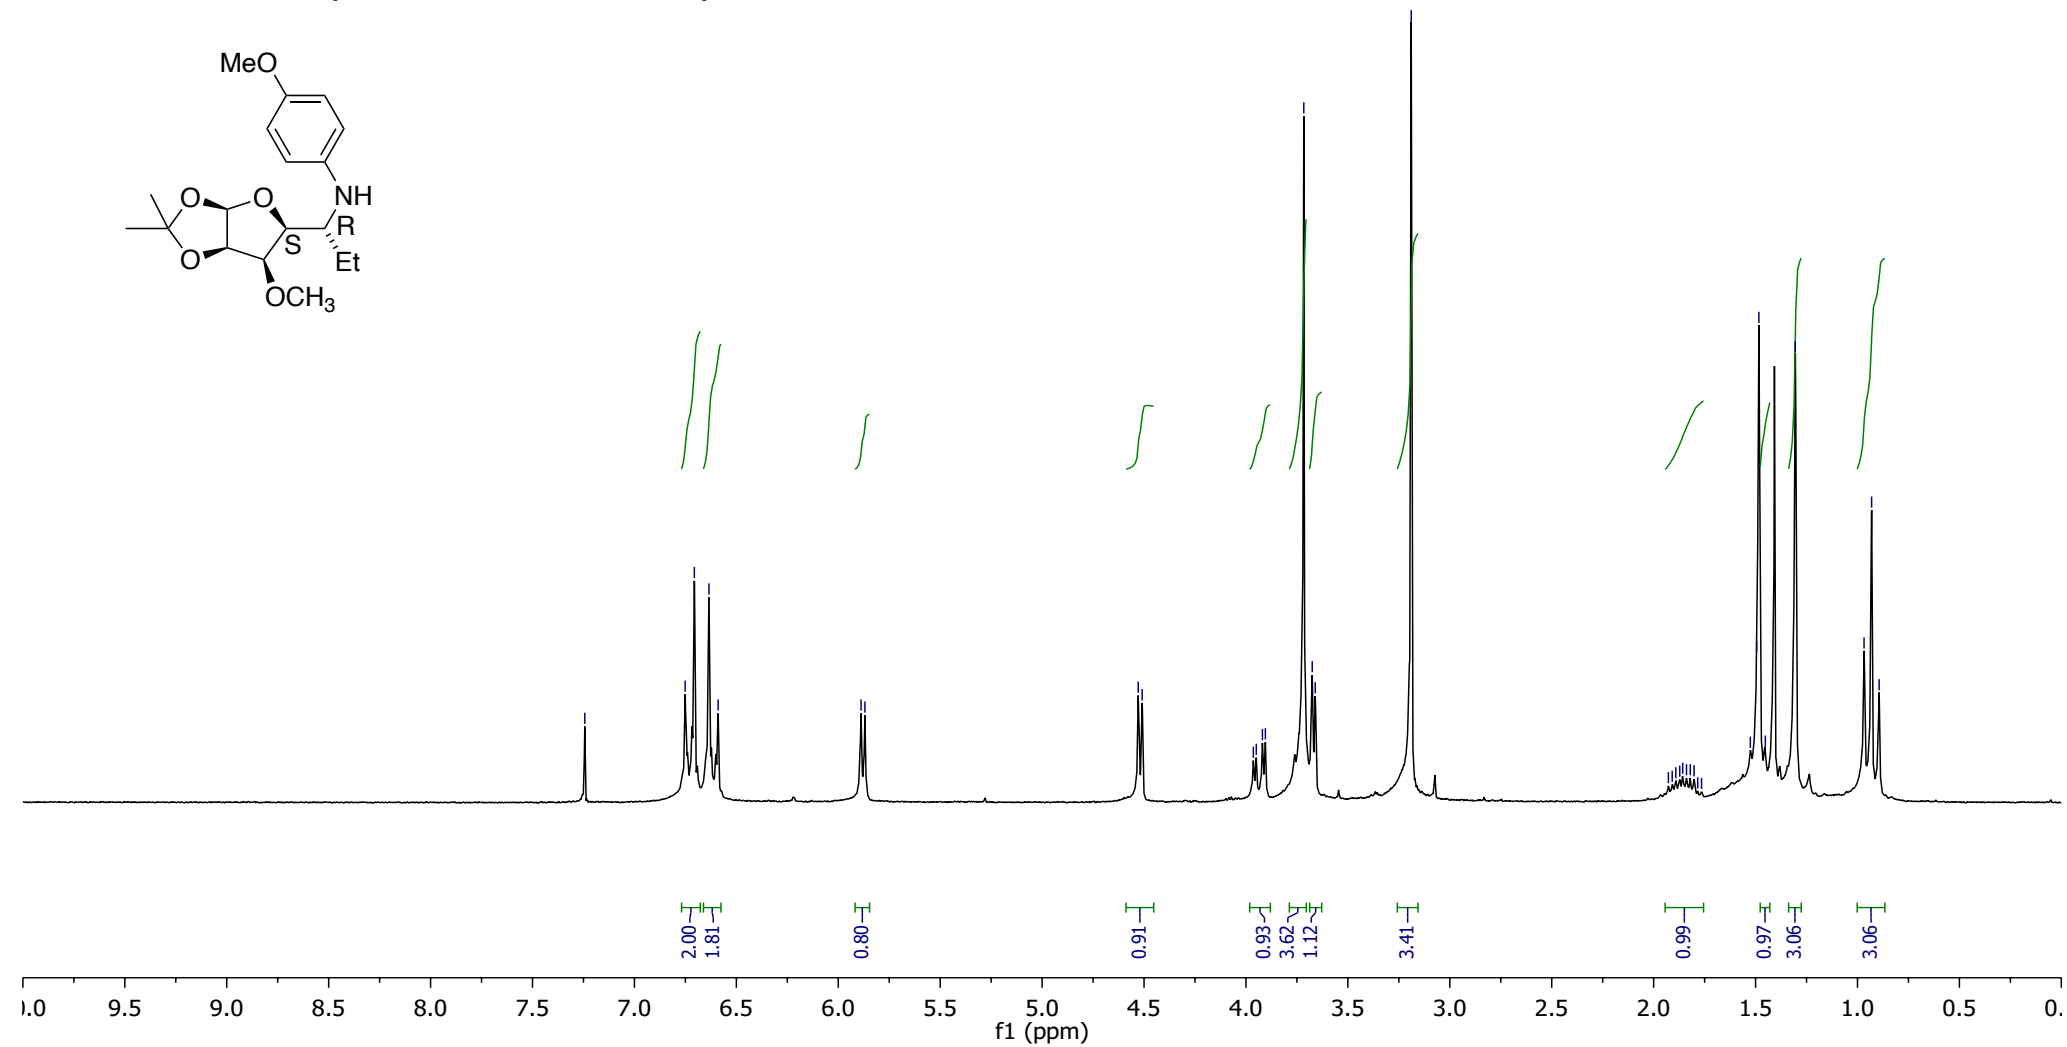

$^1\text{H}$  NMR (400 MHz,  $\text{CDCl}_3$ ) of compound 9 major diastereomer

—151.73

—142.26

—114.81

—114.60

—111.30

—104.81

—83.55

—82.33

—81.07

—57.36

—55.65

—53.36

—26.64

—26.06

—25.87

—9.65

**9** major

$^{13}\text{C}$  NMR (100 MHz,  $\text{CDCl}_3$ )

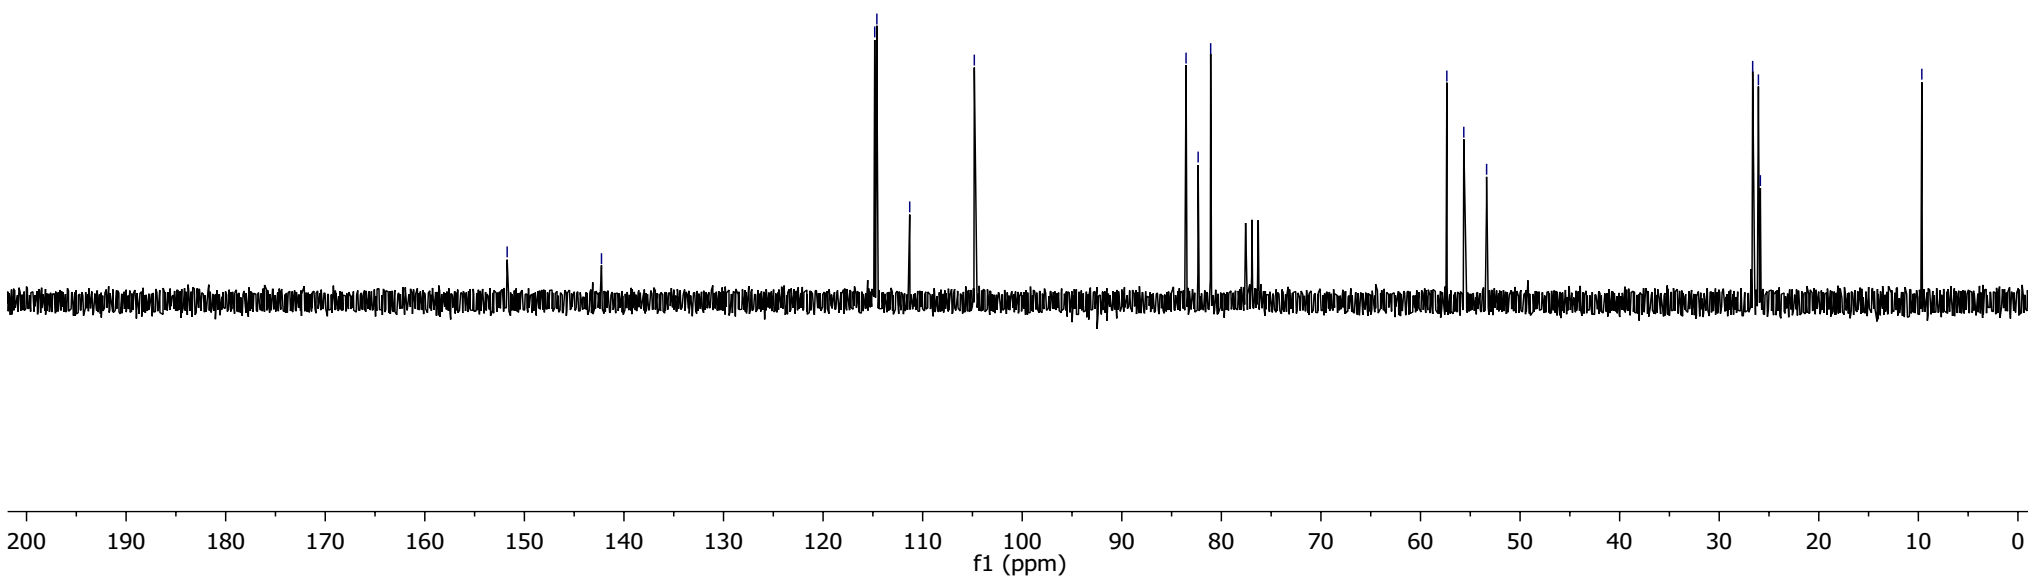

$^{13}\text{C}$  NMR (100 MHz,  $\text{CDCl}_3$ ) of compound **9** major diastereomer

**13** major

$^1\text{H}$  NMR (400 MHz,  $\text{CDCl}_3$ )

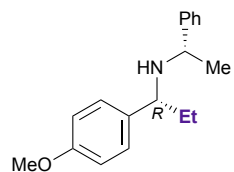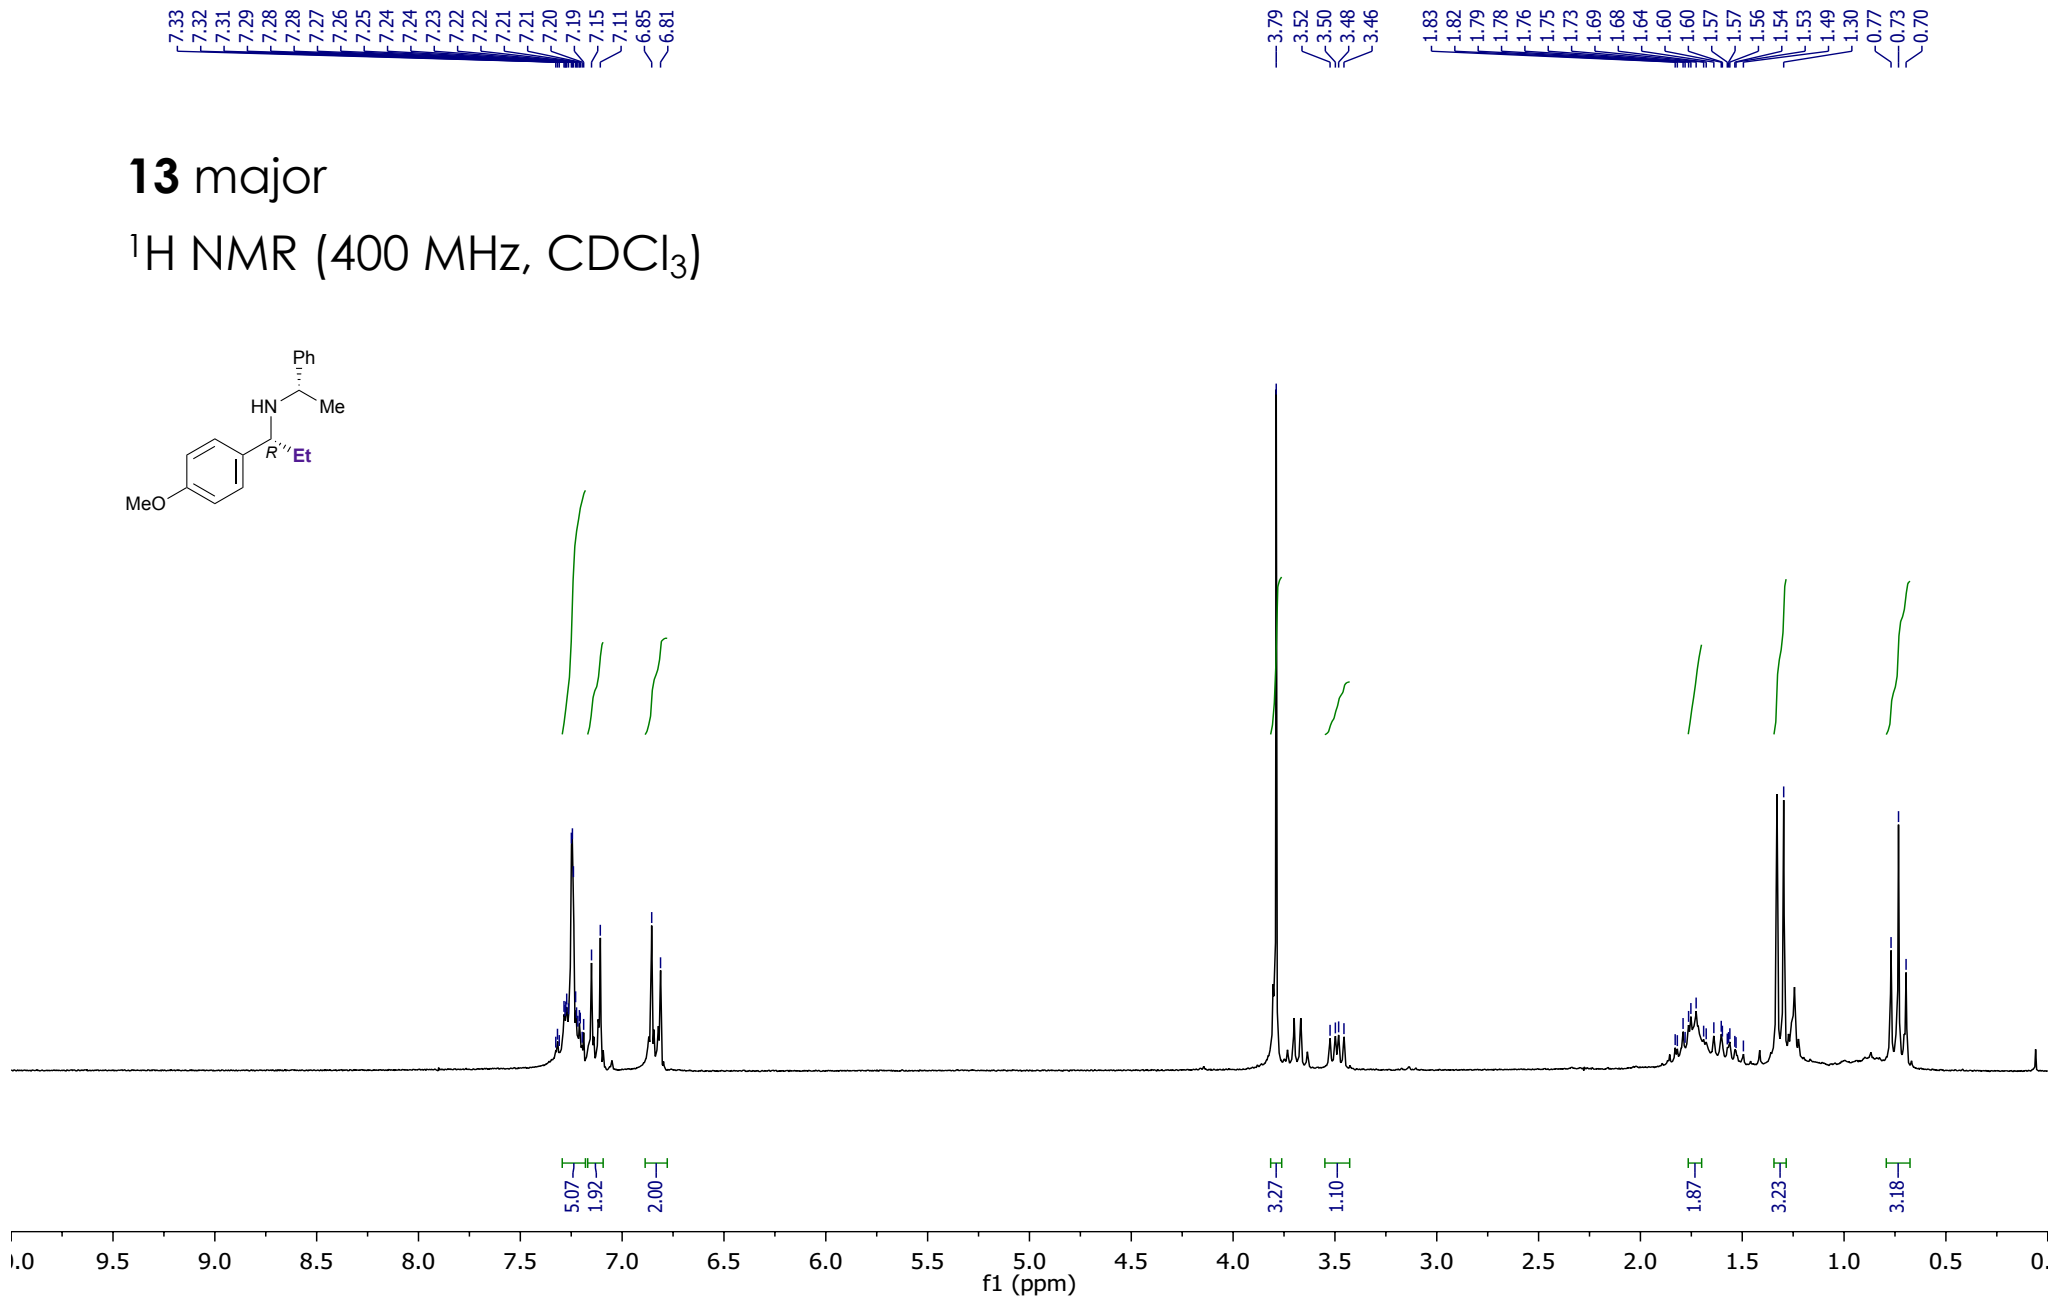

$^1\text{H}$  NMR (400 MHz,  $\text{CDCl}_3$ ) of compound **13** minor diastereomer

**13** major

$^{13}\text{C}$  NMR (100 MHz,  $\text{CDCl}_3$ )

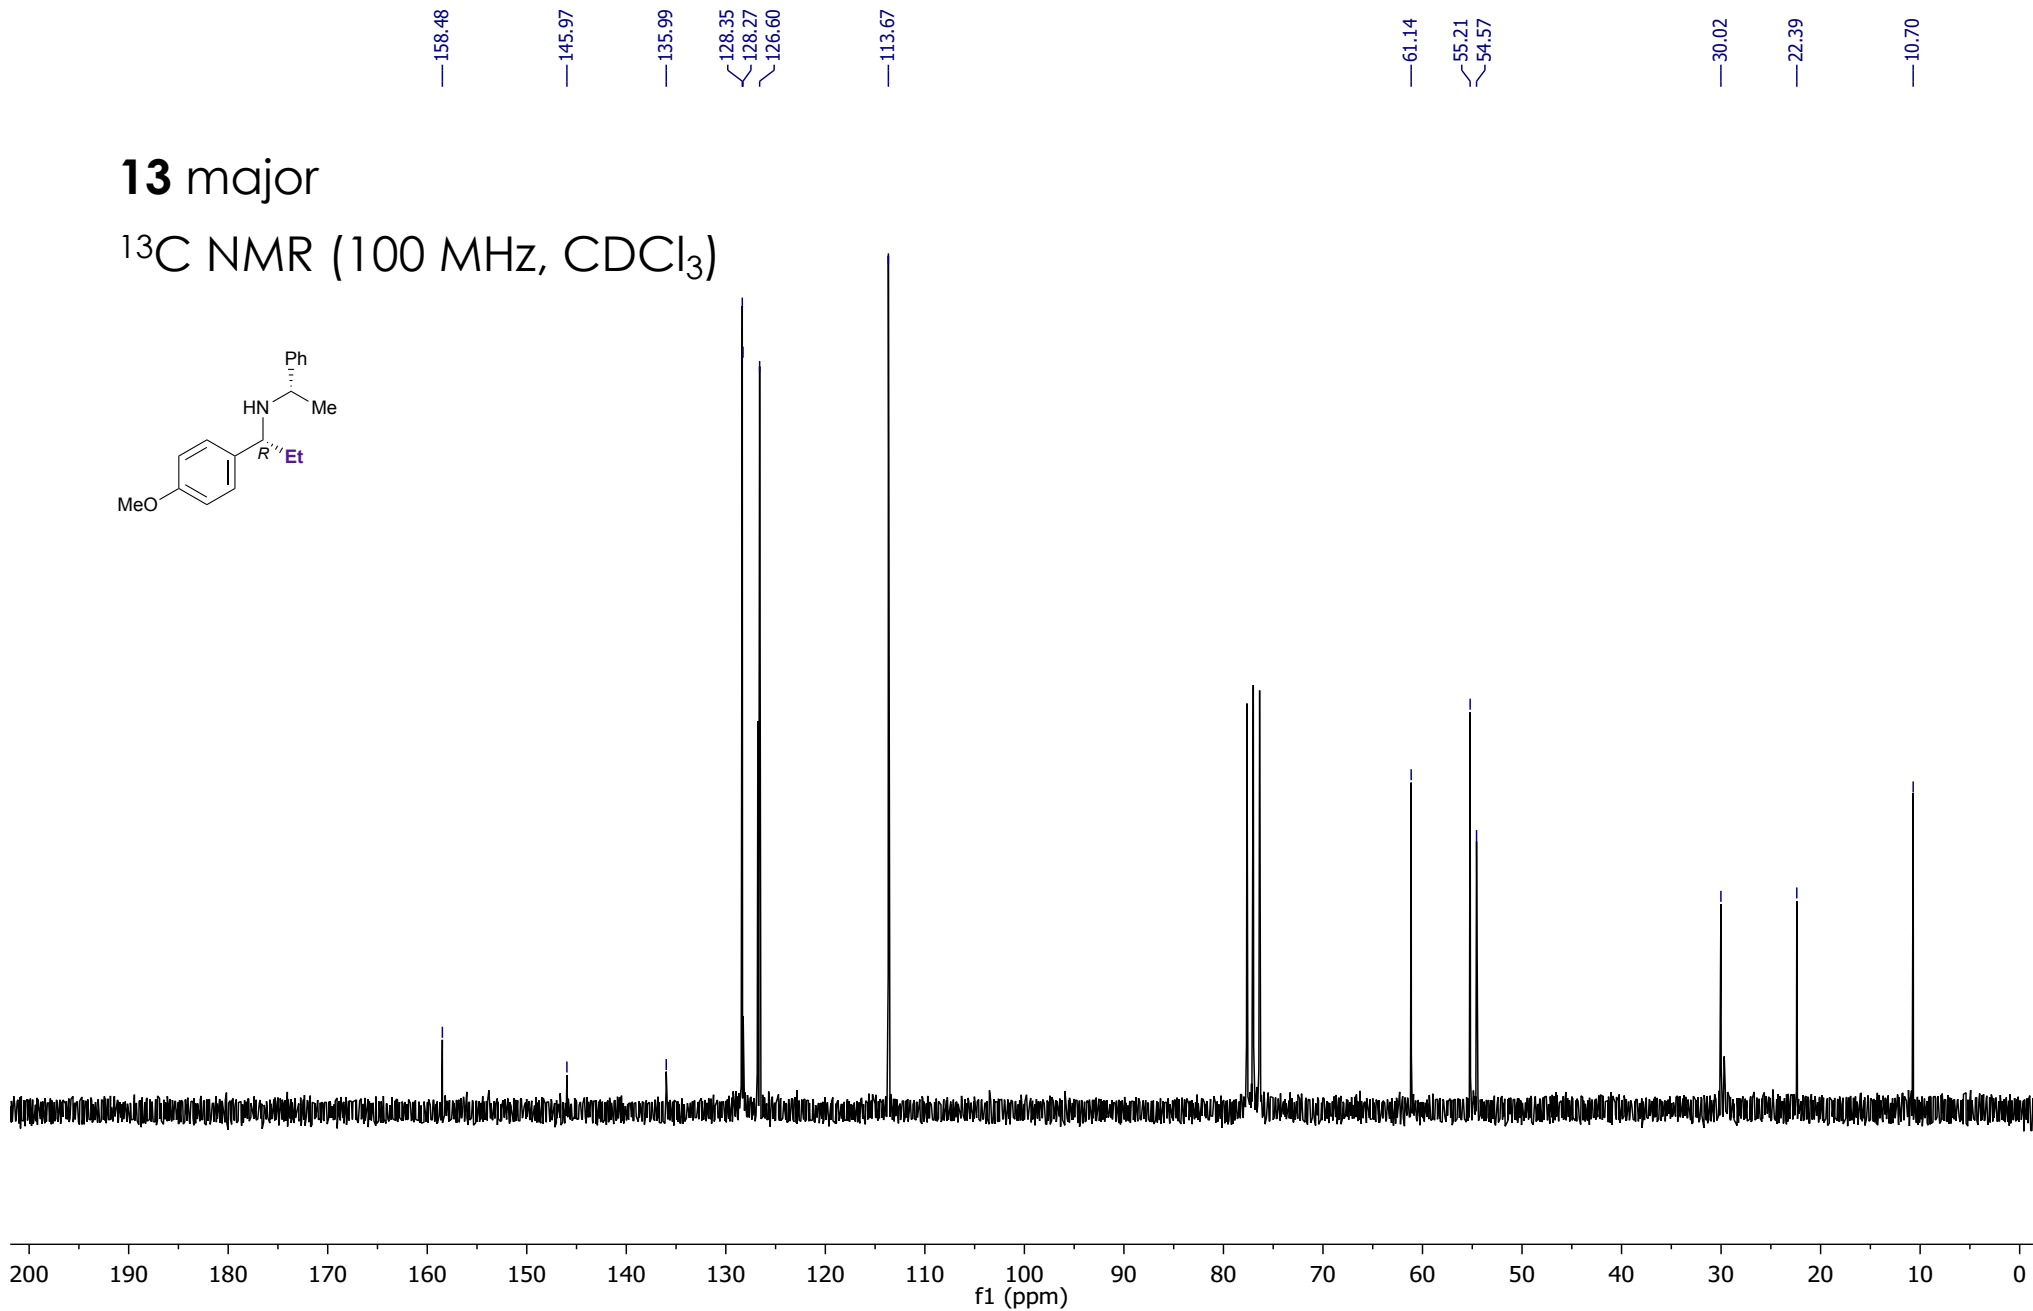

$^{13}\text{C}$  NMR (100 MHz,  $\text{CDCl}_3$ ) of compound **13** minor diastereomer

**14** major

$^1\text{H}$  NMR (400 MHz,  $\text{CDCl}_3$ )

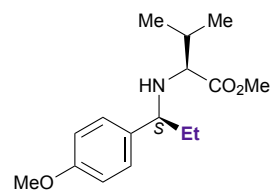

7.24  
7.19  
7.15  
7.14  
6.83  
6.83  
6.79

3.77  
3.68  
3.29  
3.26  
3.25  
3.22  
2.74  
2.71

1.79  
1.76  
1.76  
1.72  
1.64  
1.61  
1.60  
1.57  
1.54  
0.88  
0.85  
0.83  
0.79  
0.76  
0.73

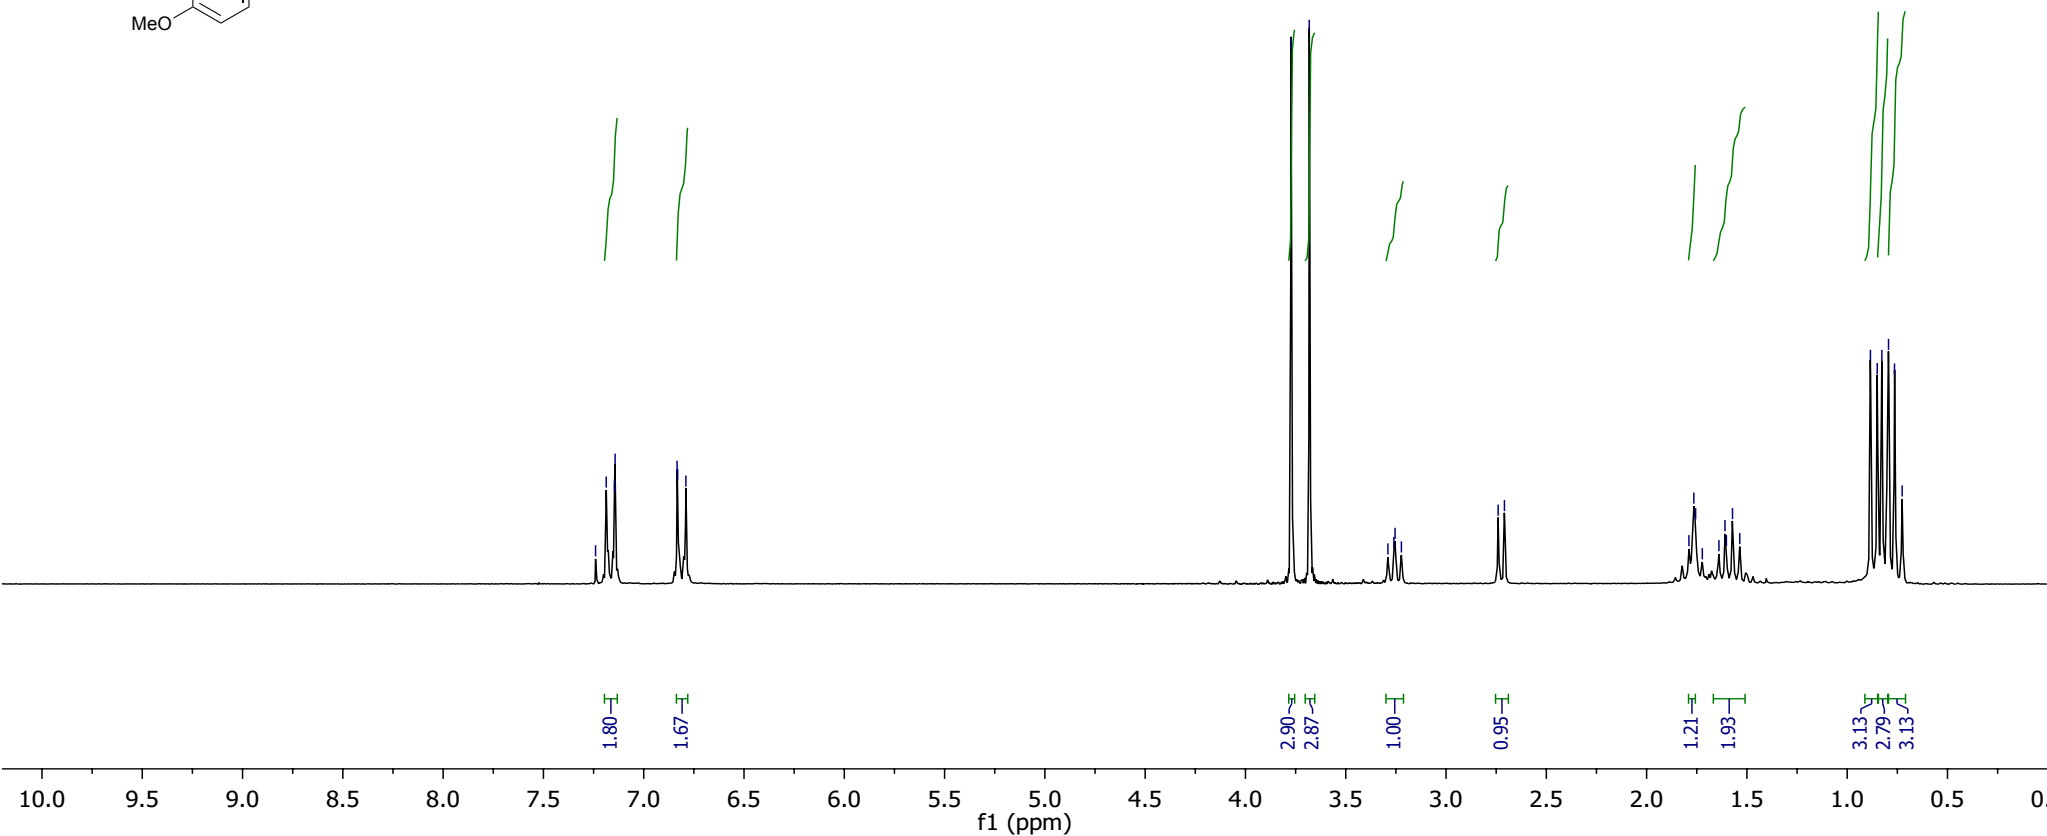

$^1\text{H}$  NMR (400 MHz,  $\text{CDCl}_3$ ) of compound **14** major diastereomer

**14** major

$^{13}\text{C}$  NMR (100 MHz,  $\text{CDCl}_3$ )



— 176.41

— 158.60

— 135.66

— 128.74

— 113.45

— 64.38

— 62.88

— 55.16

— 51.24

— 31.98

— 31.71

— 19.43

— 18.57

— 10.62

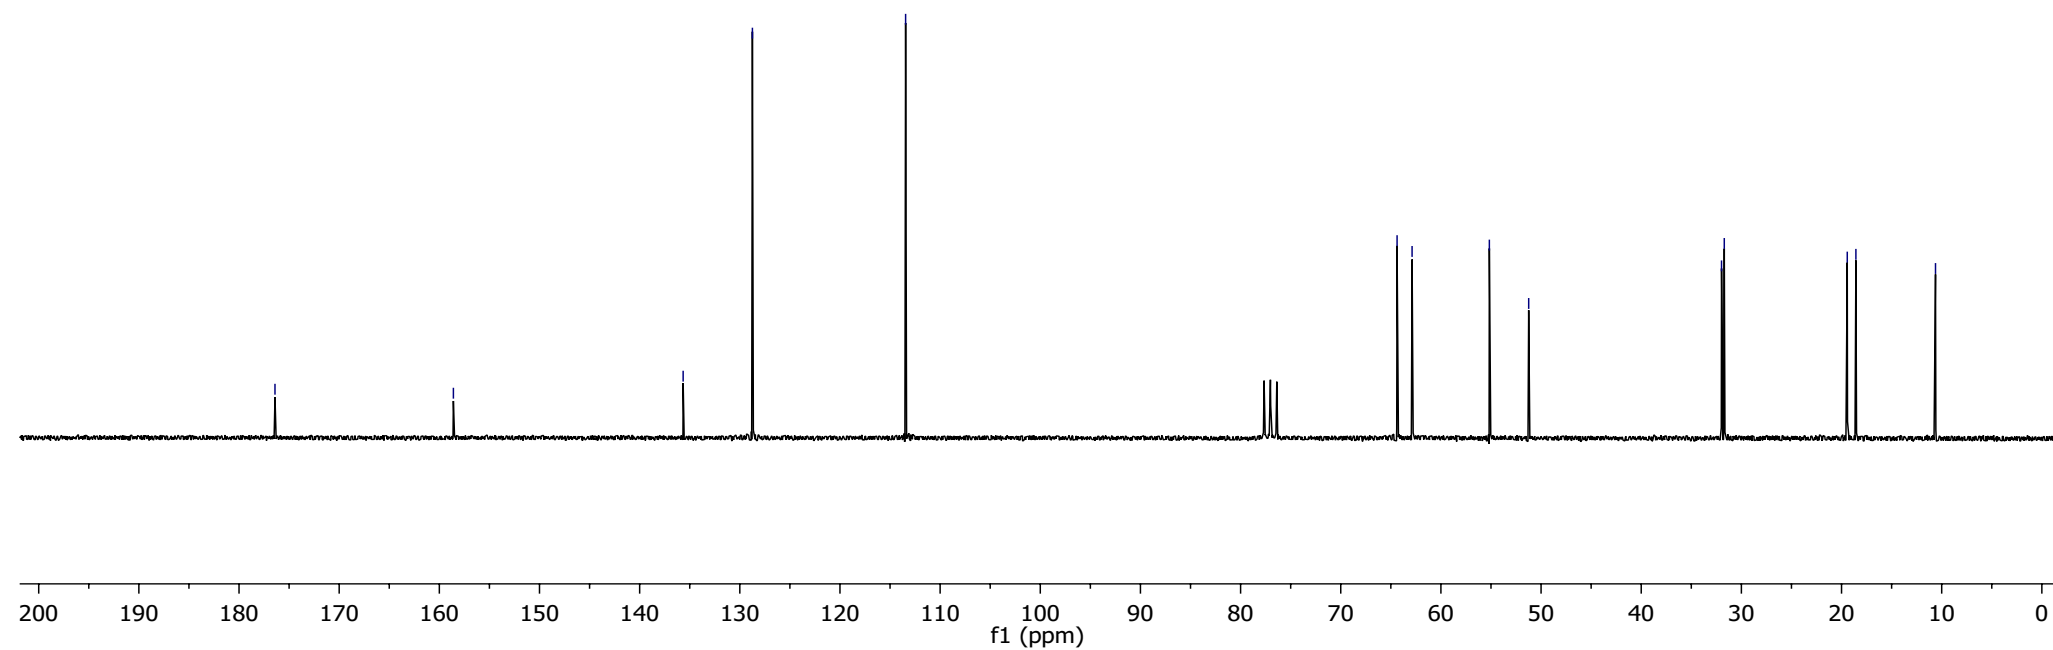

$^{13}\text{C}$  NMR (100 MHz,  $\text{CDCl}_3$ ) of compound **14** major diastereomer



**6** major  
nOe

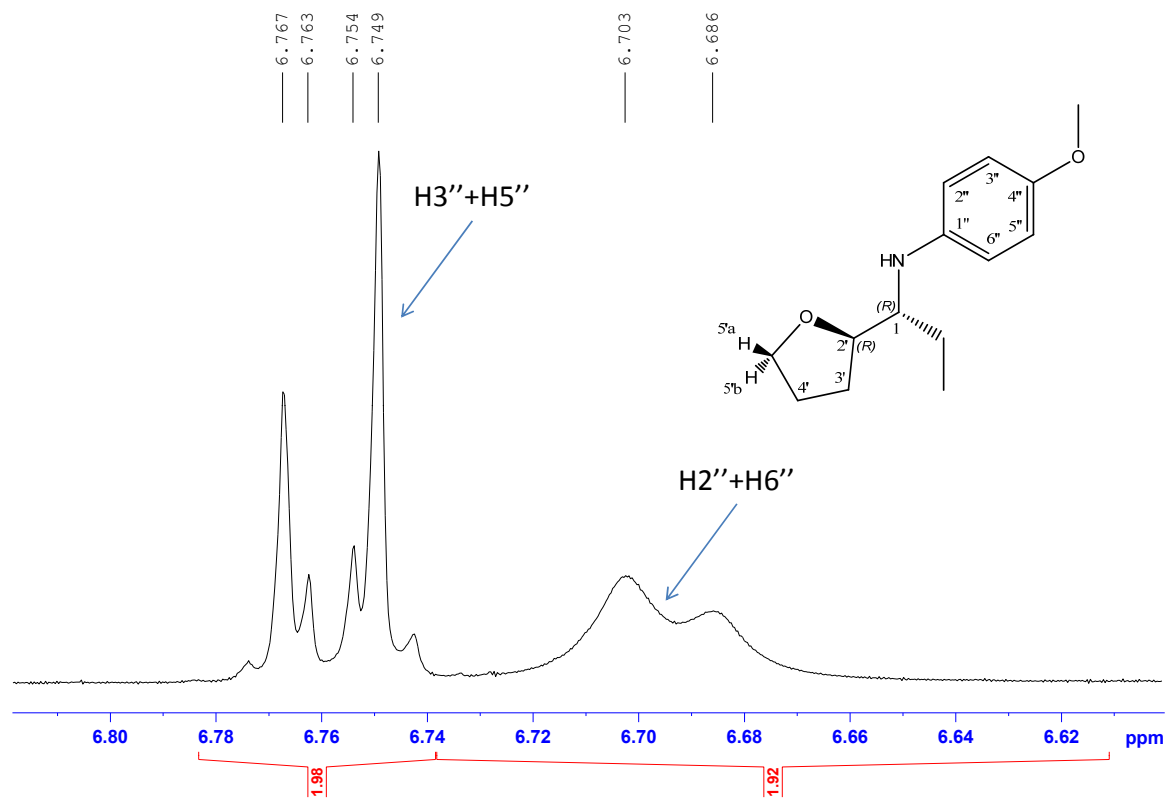

<sup>1</sup>H NMR (400 MHz, CDCl<sub>3</sub>) NOE for compound **6** major diastereomer

6 major  
nOe

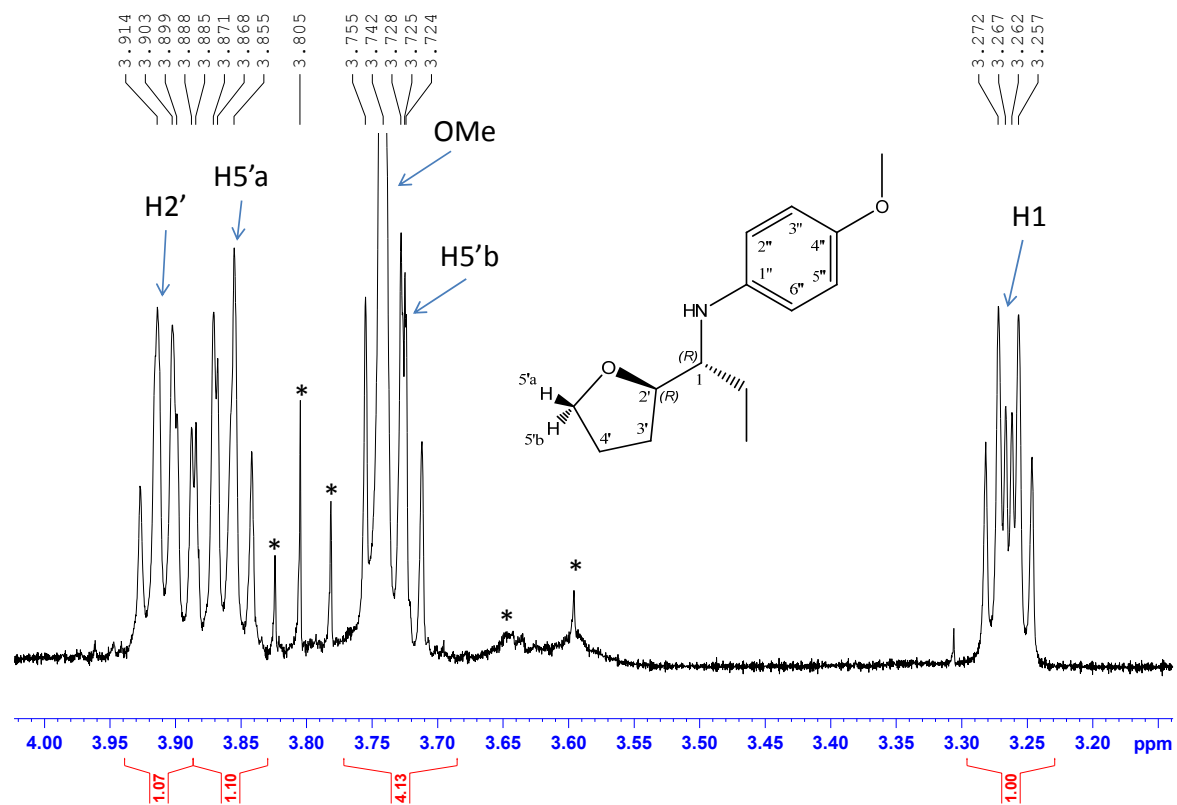

$^1\text{H}$  NMR (400 MHz,  $\text{CDCl}_3$ ) NOE for compound **6** major diastereomer

6 major  
nOe

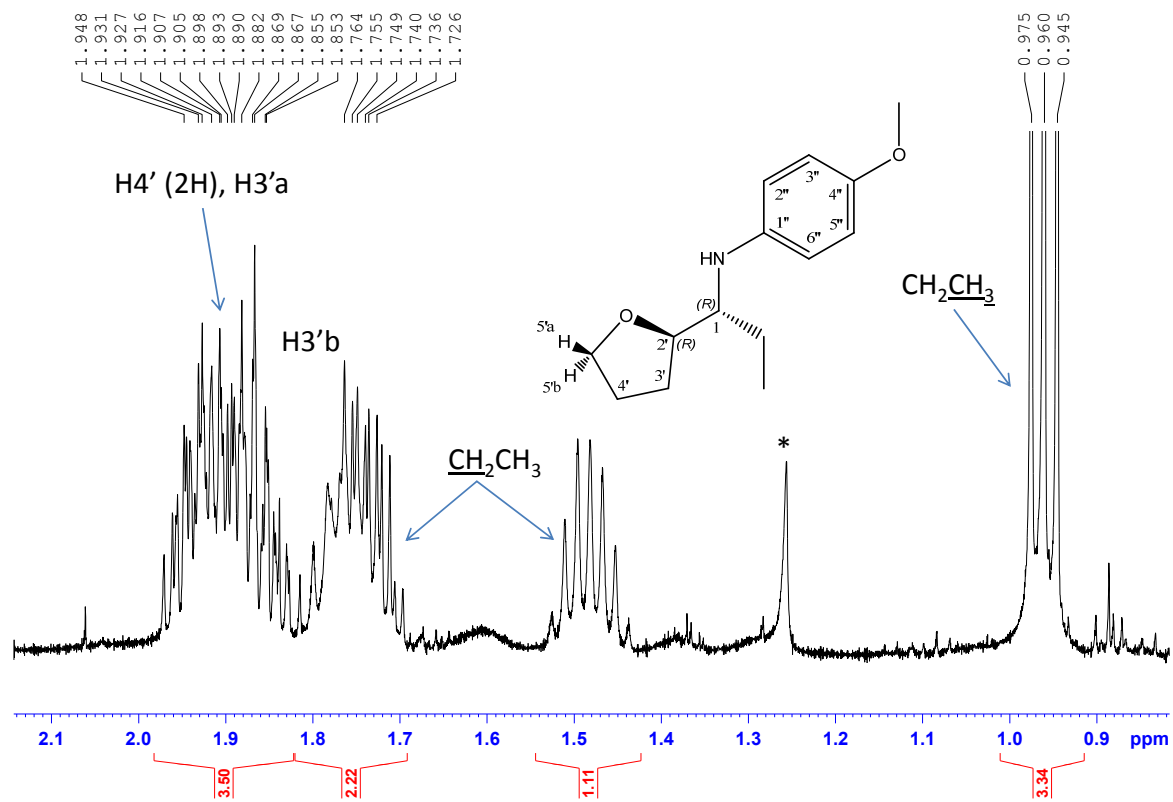

<sup>1</sup>H NMR (400 MHz, CDCl<sub>3</sub>) NOE for compound **6** major diastereomer

# 6 major NOESY

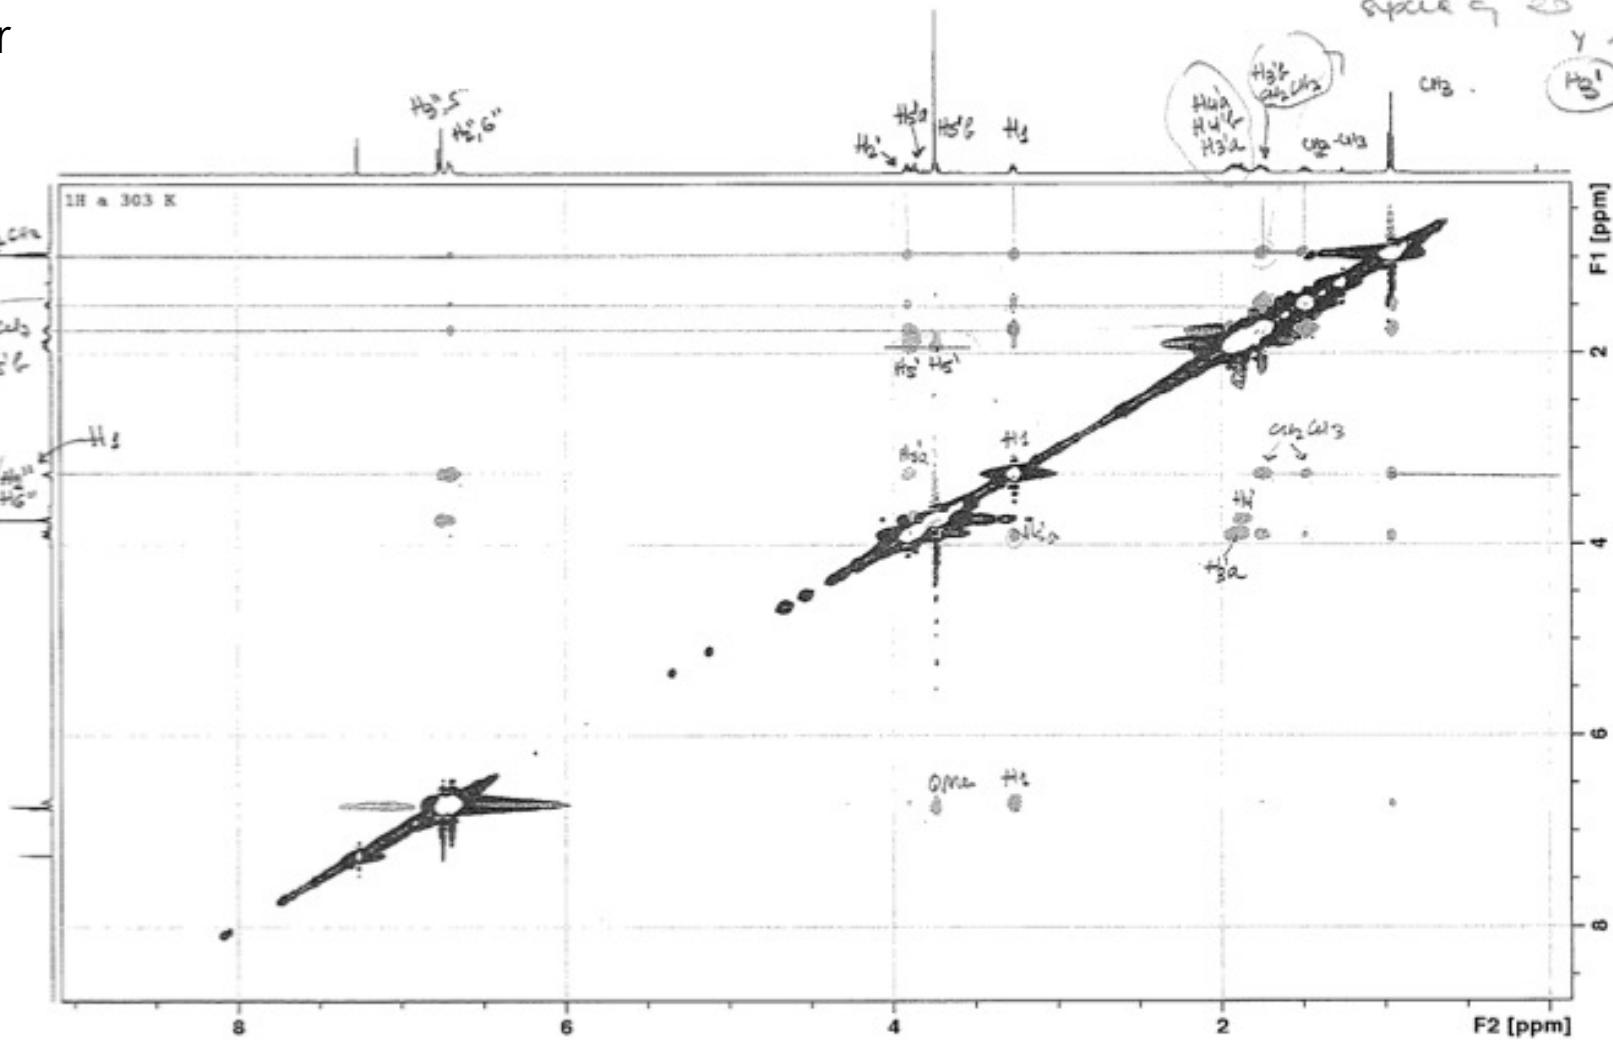

<sup>1</sup>H NMR (400 MHz, CDCl<sub>3</sub>) NOESY for compound **6** major diastereomer

CR

6 major

## STEREOCHEMISTRY and observed nOe

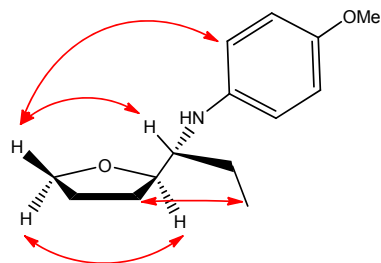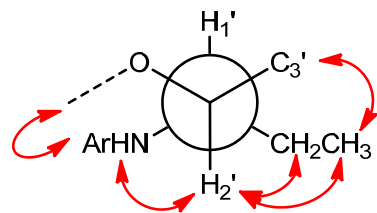

Stereochemistry and observed NOE for compound **6** major diastereomer

7 minor  
nOe

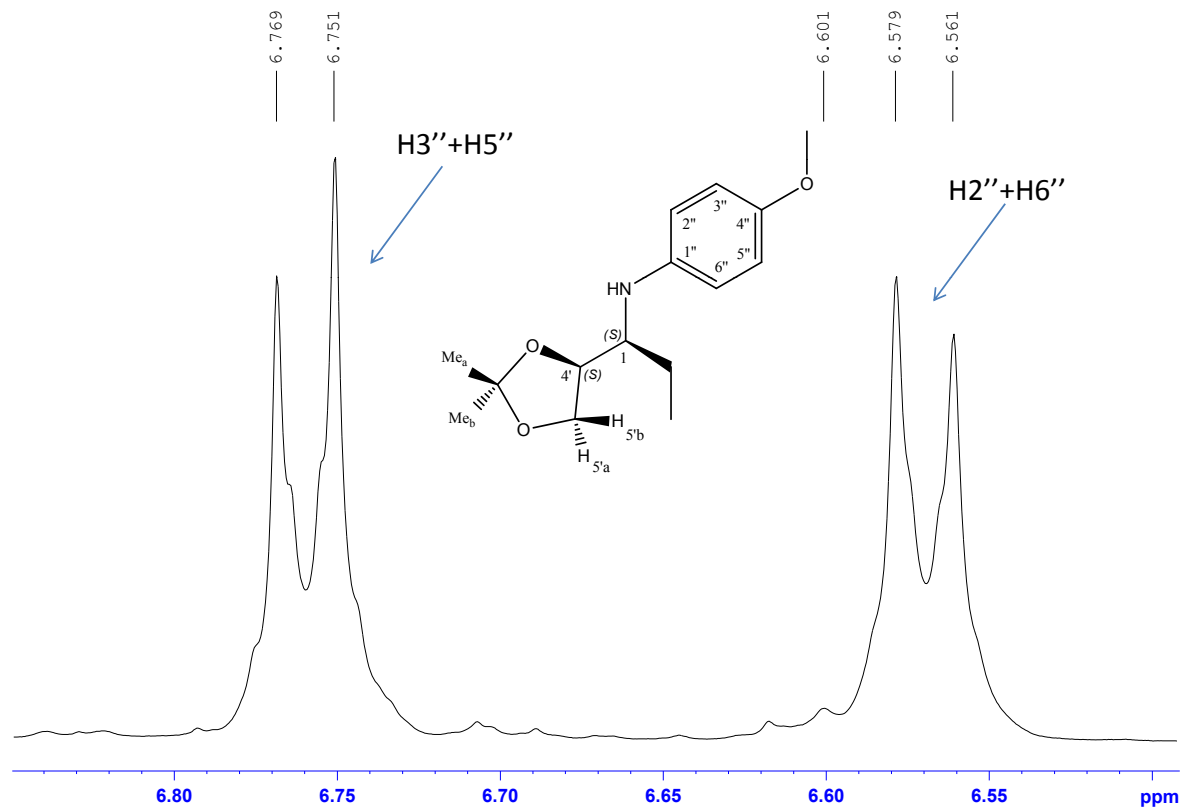

$^1\text{H}$  NMR (400 MHz,  $\text{CDCl}_3$ ) NOE for compound **7** minor diastereomer

7 minor  
nOe

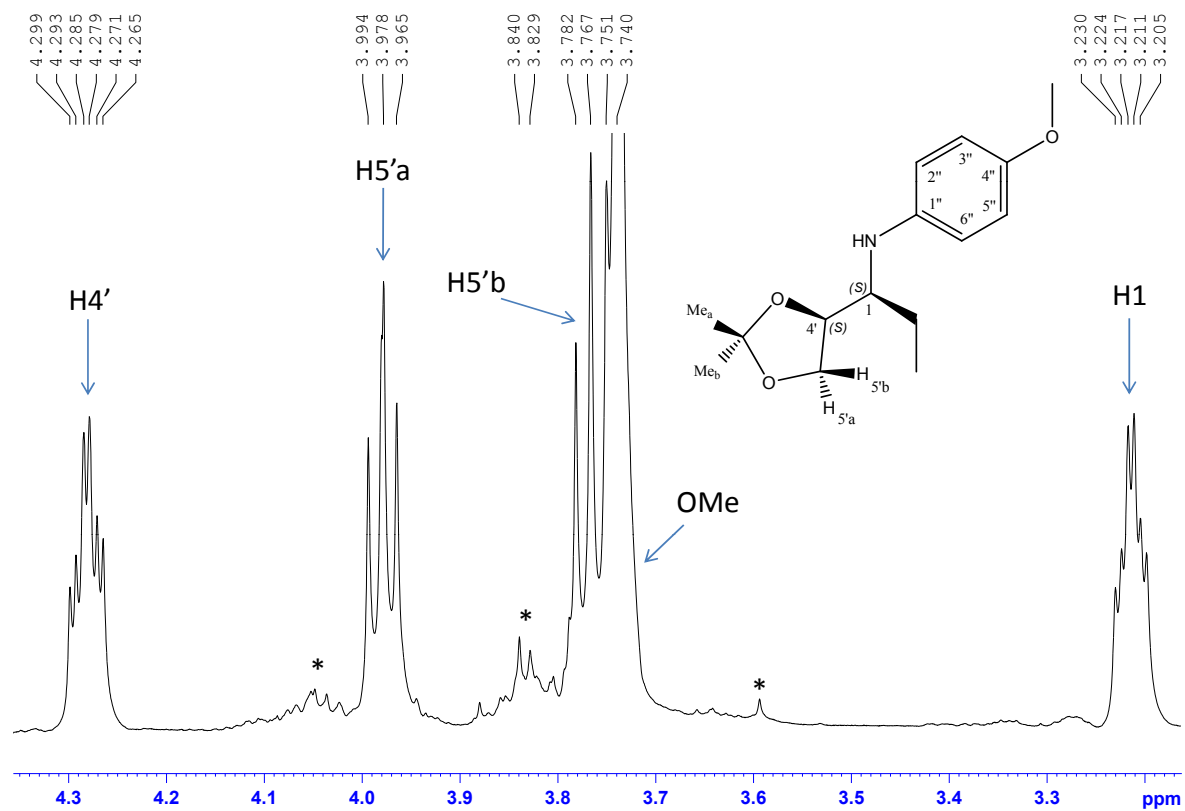

$^1\text{H}$  NMR (400 MHz,  $\text{CDCl}_3$ ) NOE for compound **7** minor diastereomer

7 minor  
nOe

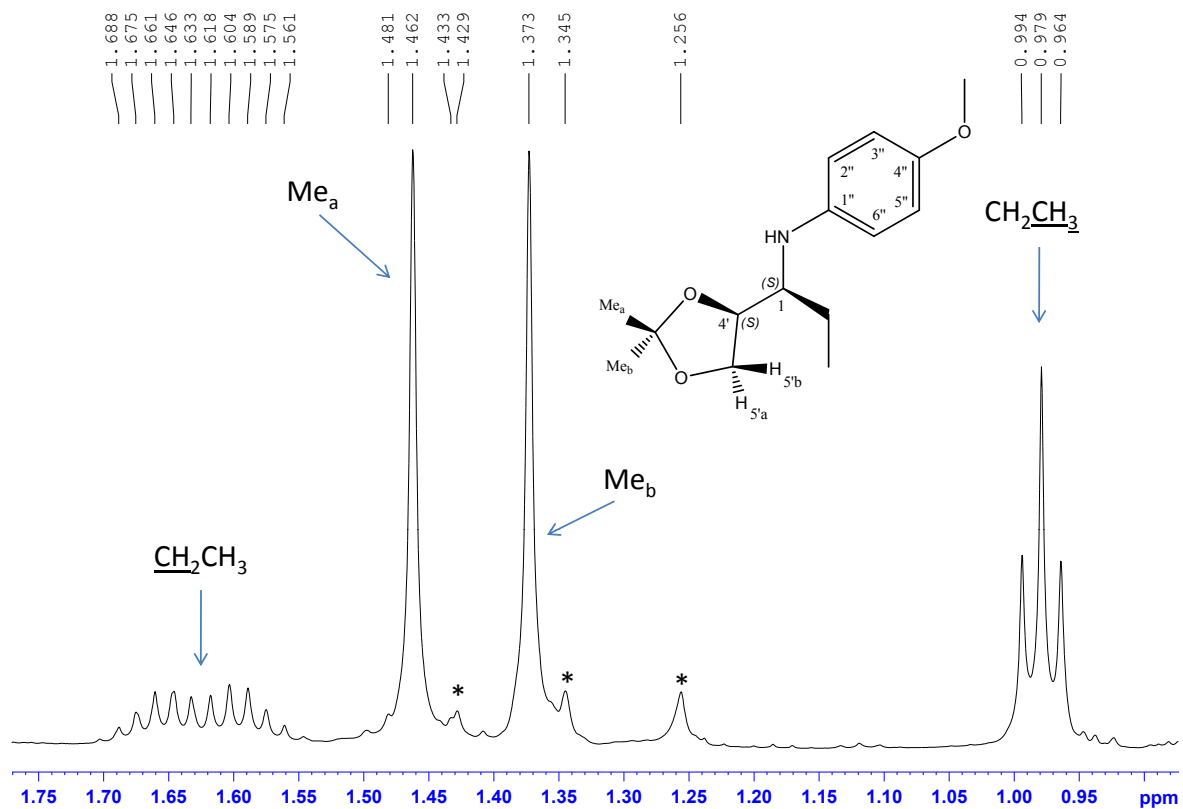

<sup>1</sup>H NMR (400 MHz, CDCl<sub>3</sub>) NOE for compound **7** minor diastereomer



7 minor  
NOESY

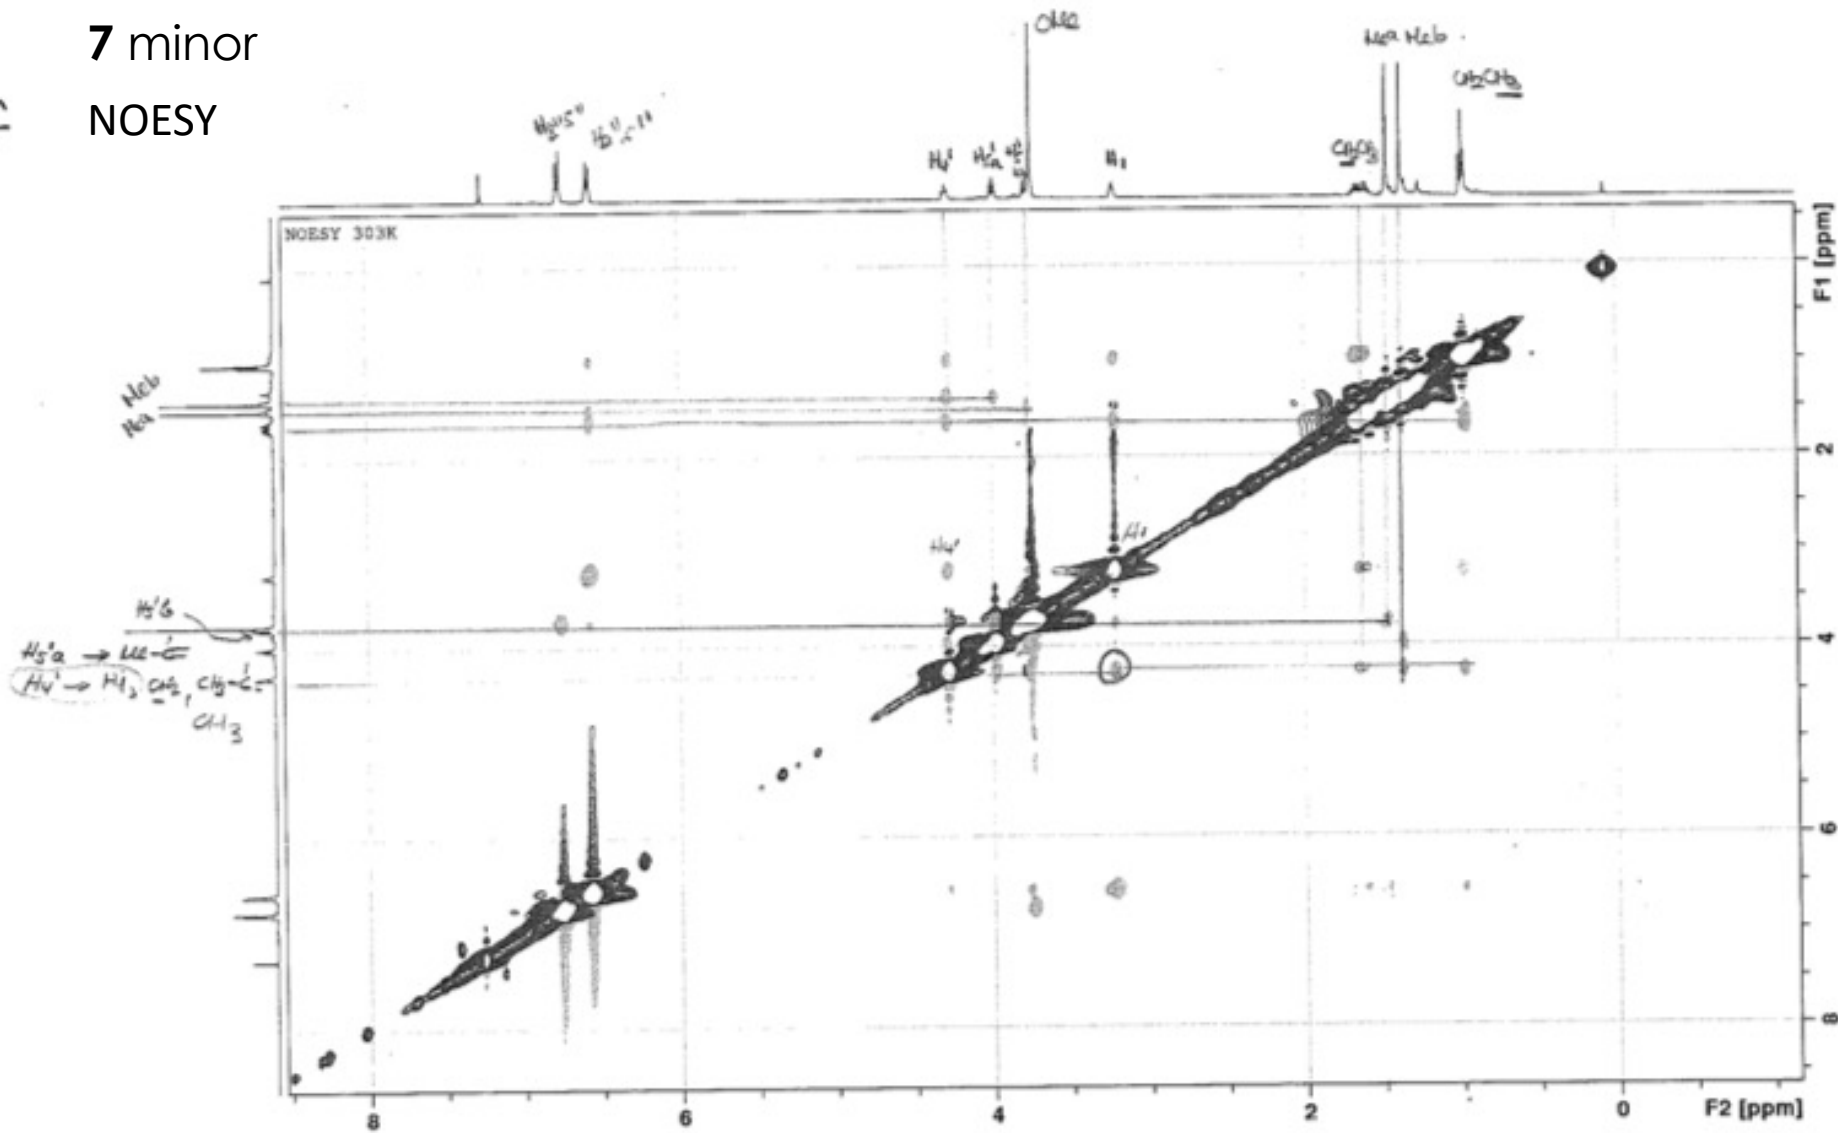

<sup>1</sup>H NMR (400 MHz, CDCl<sub>3</sub>) NOESY for compound **7** minor diastereomer

7 minor

## STEREOCHEMISTRY and observed nOe

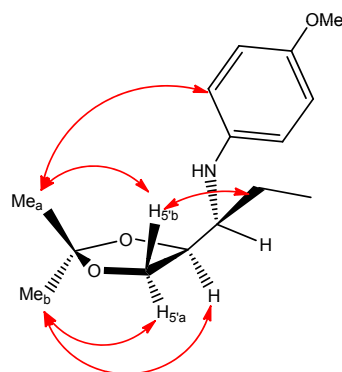

Stereochemistry and observed NOE for compound **7** minor diastereomer

7 major  
nOe

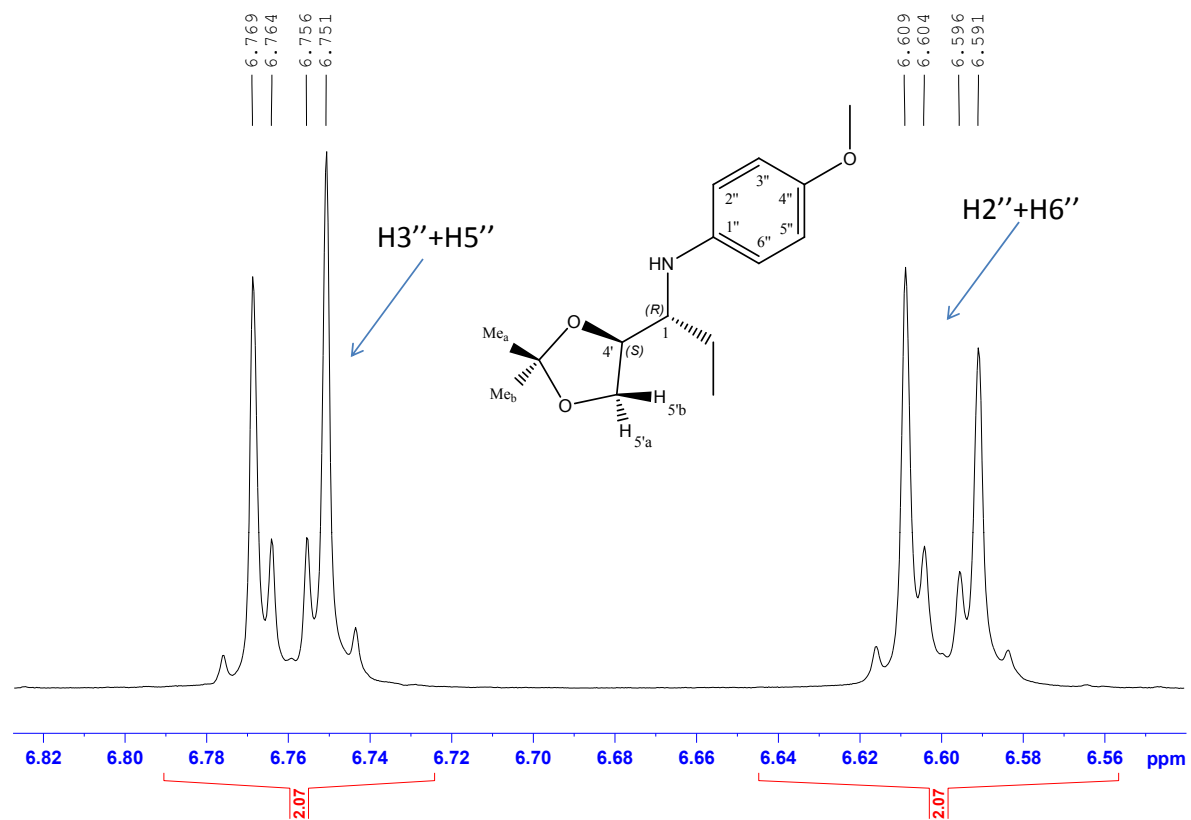

$^1\text{H}$  NMR (400 MHz,  $\text{CDCl}_3$ ) NOE for compound **7** major diastereomer

7 major  
nOe

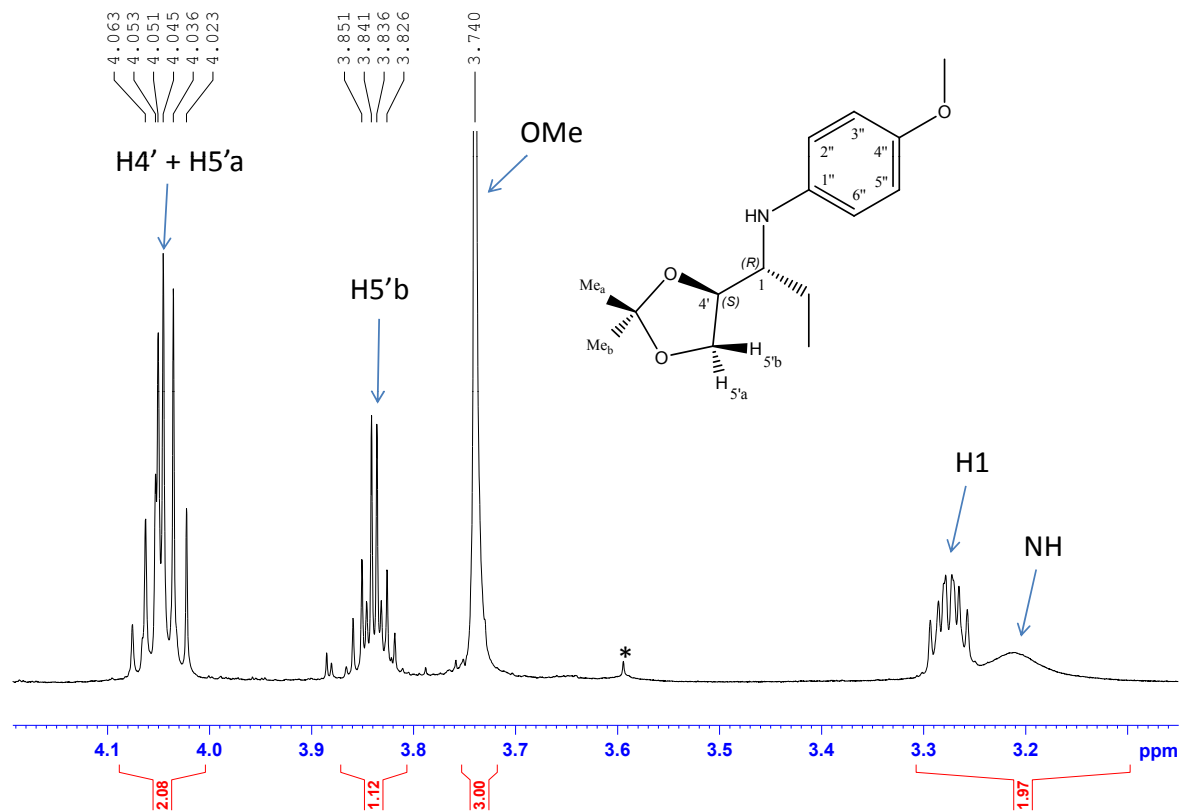

$^1\text{H}$  NMR (400 MHz,  $\text{CDCl}_3$ ) NOE for compound **7** major diastereomer

7 major  
nOe

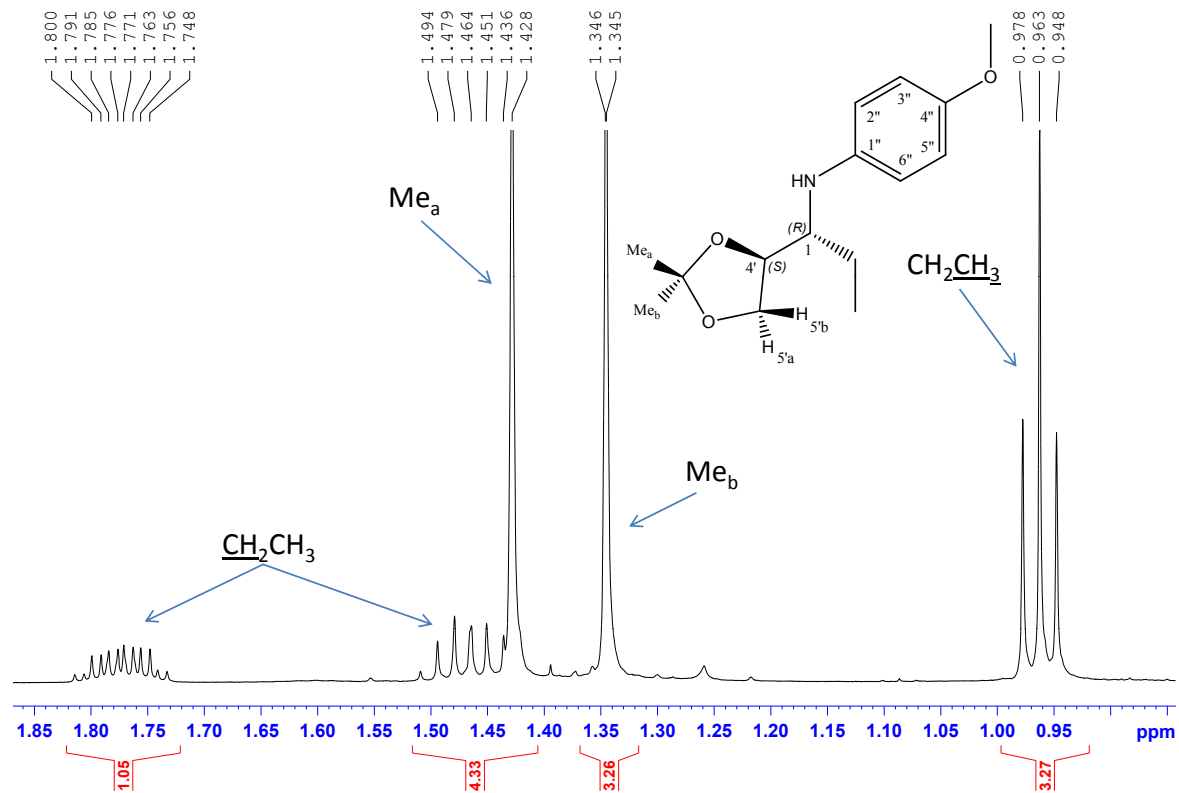

<sup>1</sup>H NMR (400 MHz, CDCl<sub>3</sub>) NOE for compound 7 major diastereomer

TR

# 7 major NOESY

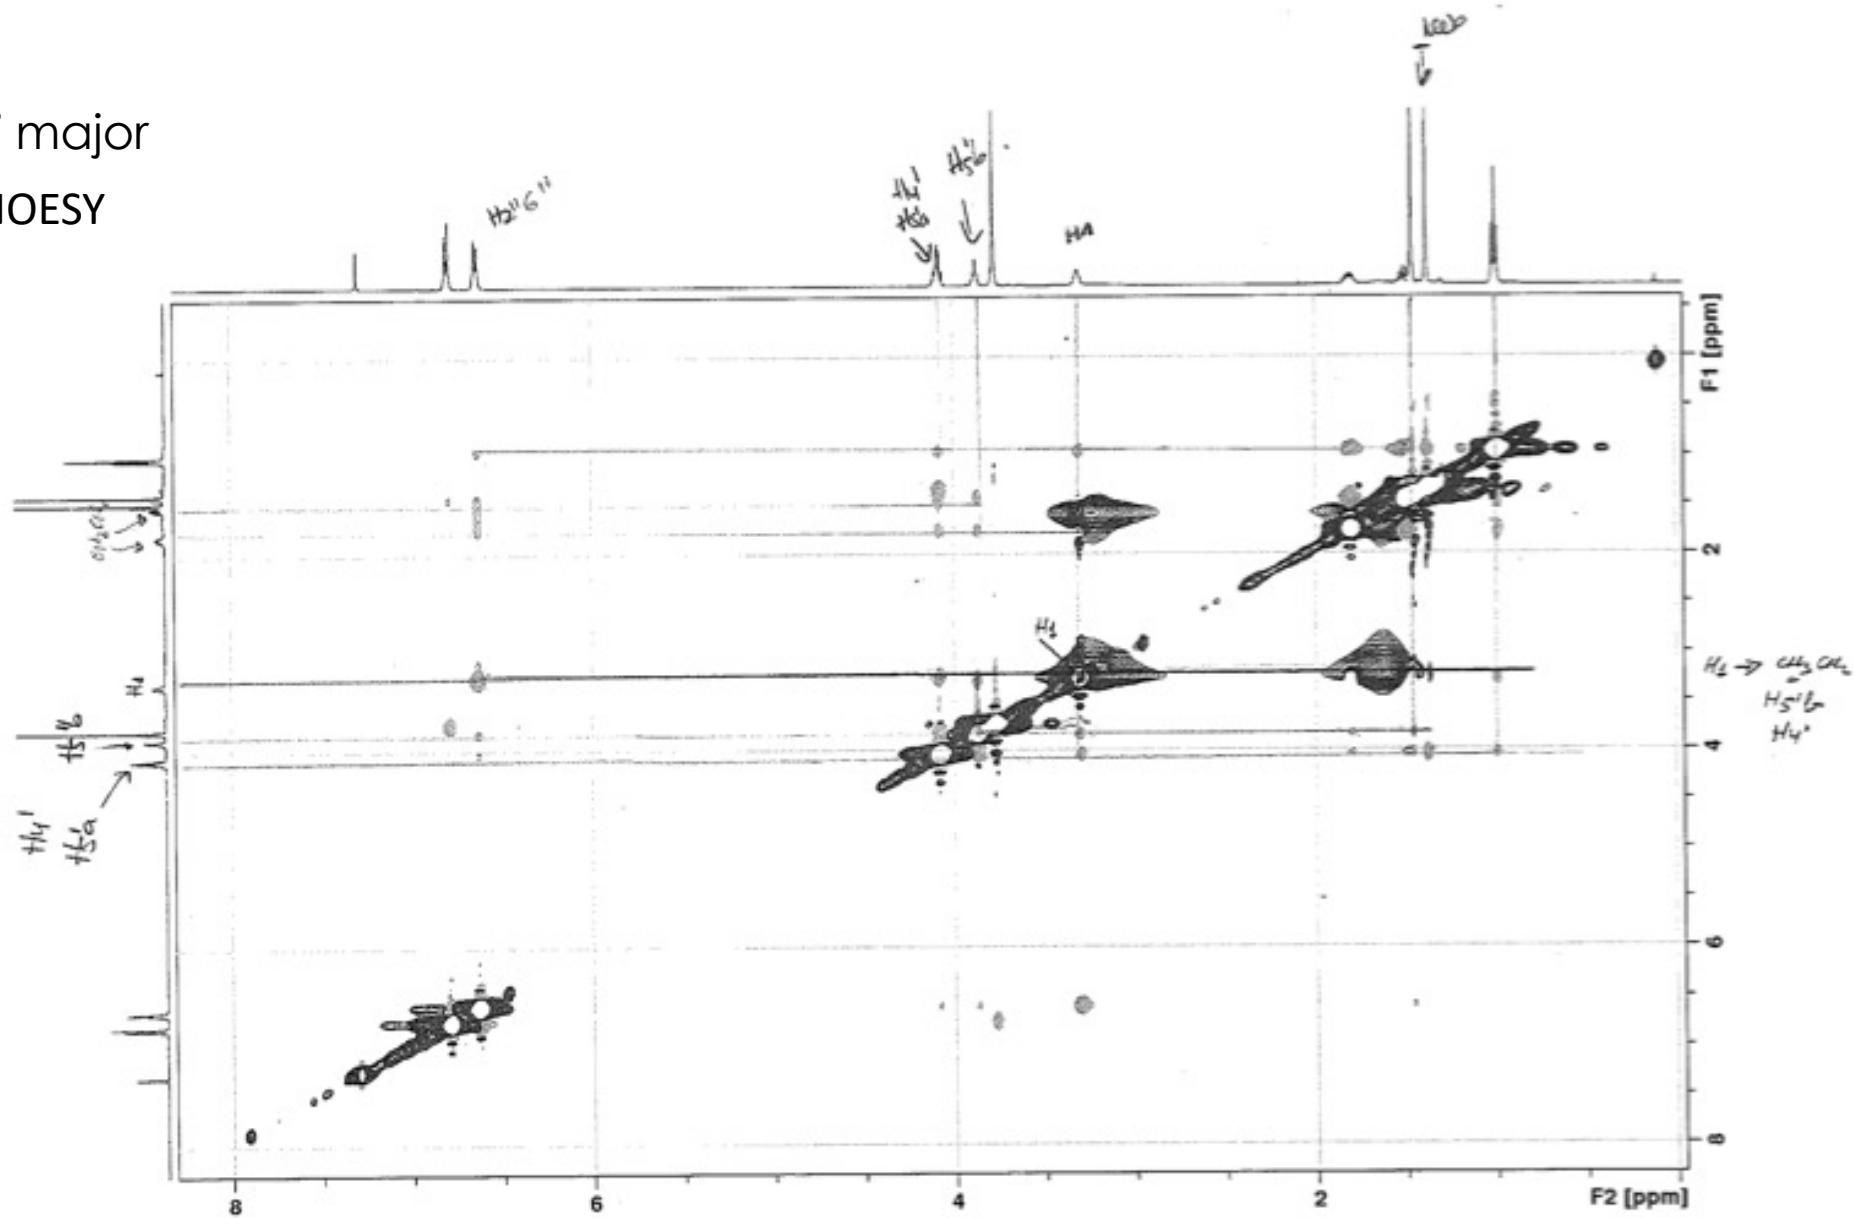

<sup>1</sup>H NMR (400 MHz, CDCl<sub>3</sub>) NOESY for compound **7** major diastereomer

**7** major  
nOe

## STEREOCHEMISTRY and observed nOe

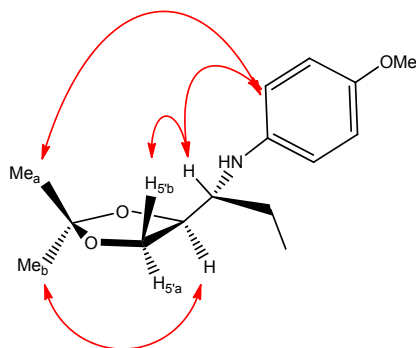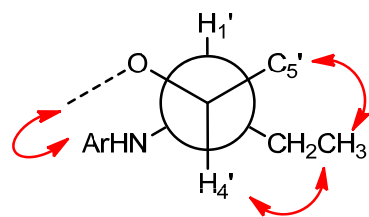

Stereochemistry and observed NOE for compound **7** major diastereomer

9 major  
nOe

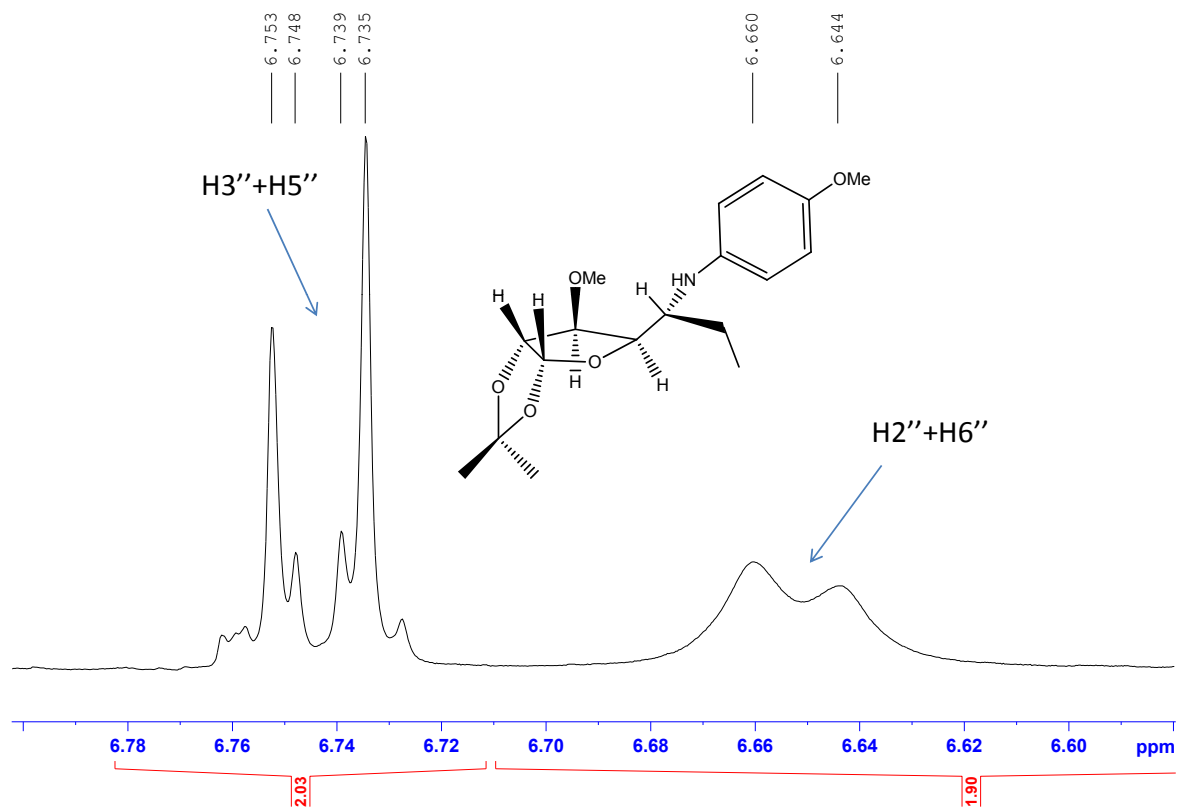

<sup>1</sup>H NMR (400 MHz, CDCl<sub>3</sub>) NOE for compound 9 major diastereomer



**9** major  
nOe

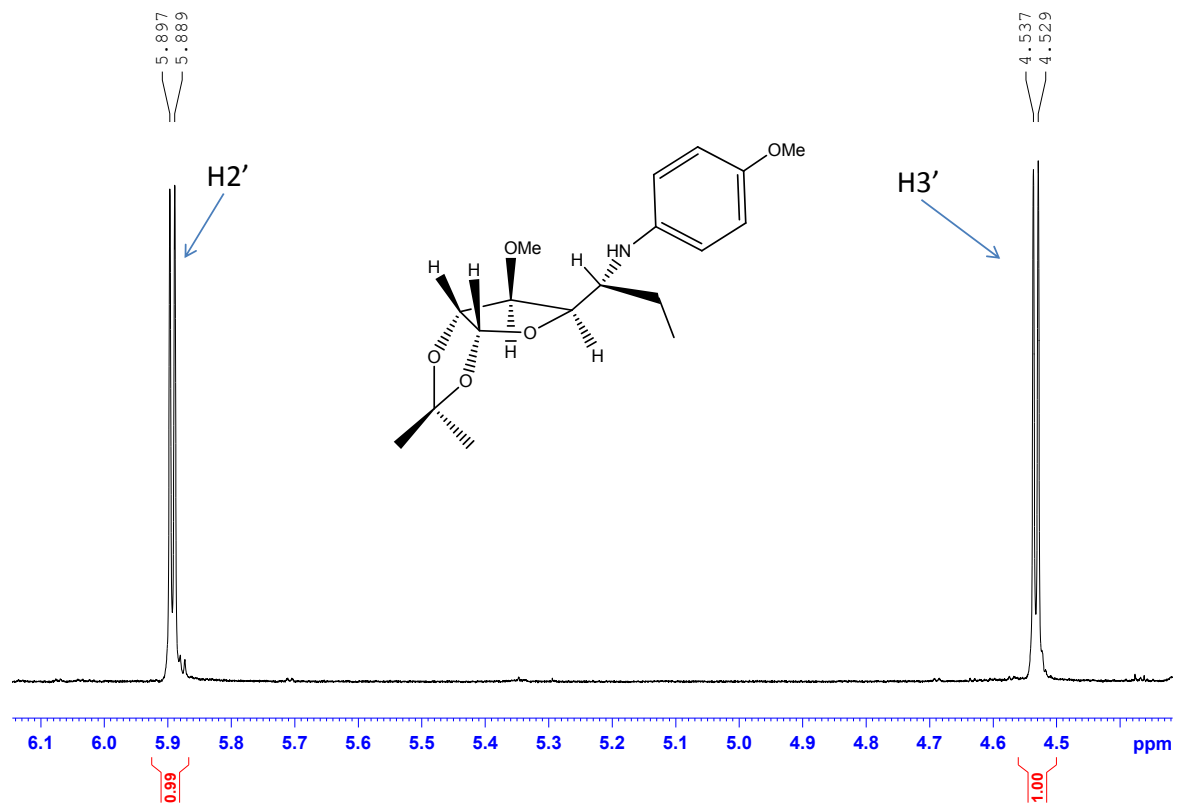

<sup>1</sup>H NMR (400 MHz, CDCl<sub>3</sub>) NOE for compound **9** major diastereomer

9 major  
nOe

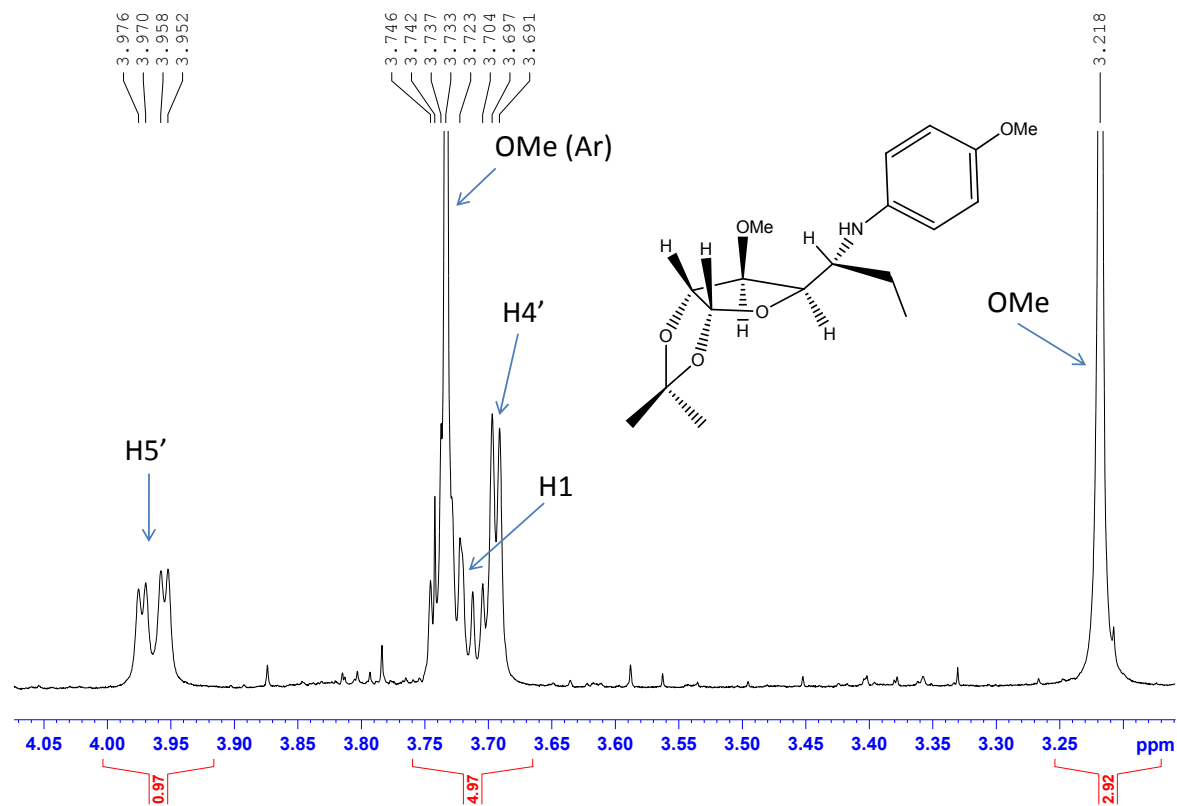

$^1\text{H}$  NMR (400 MHz,  $\text{CDCl}_3$ ) NOE for compound **9** major diastereomer

9 major  
nOe

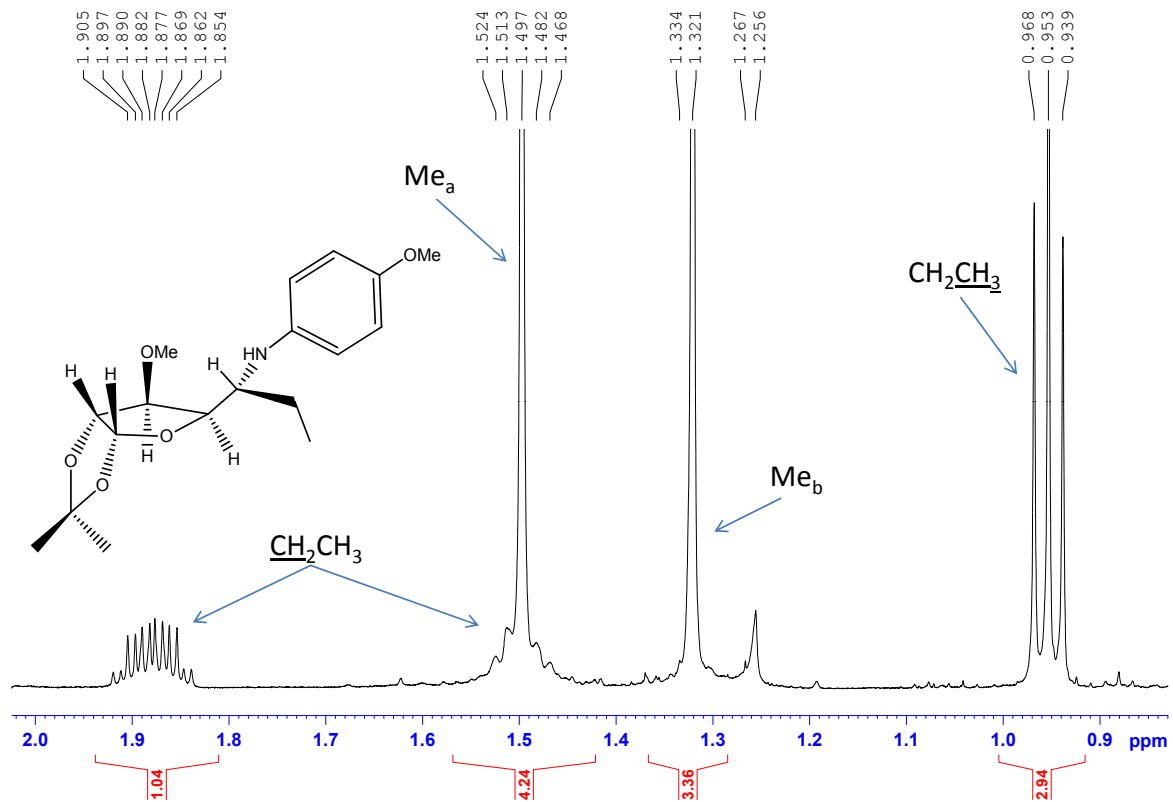

$^1\text{H}$  NMR (400 MHz,  $\text{CDCl}_3$ ) NOE for compound **9** major diastereomer



9 major

## STEREOCHEMISTRY and observed nOe

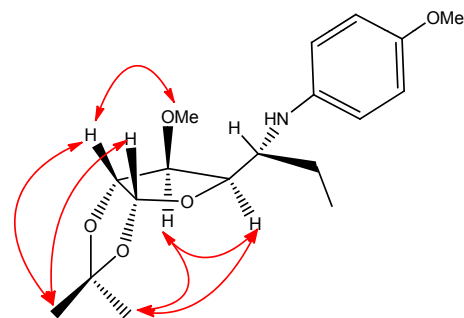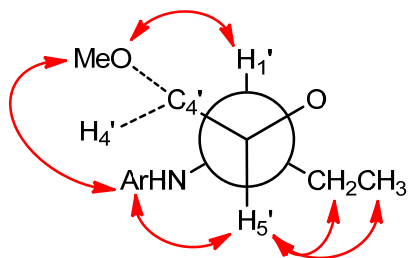

Stereochemistry and observed NOE for compound 9 major diastereomer

**11** major

<sup>1</sup>H-NMR (500 MHz, CDCl<sub>3</sub>)

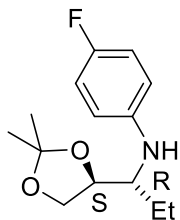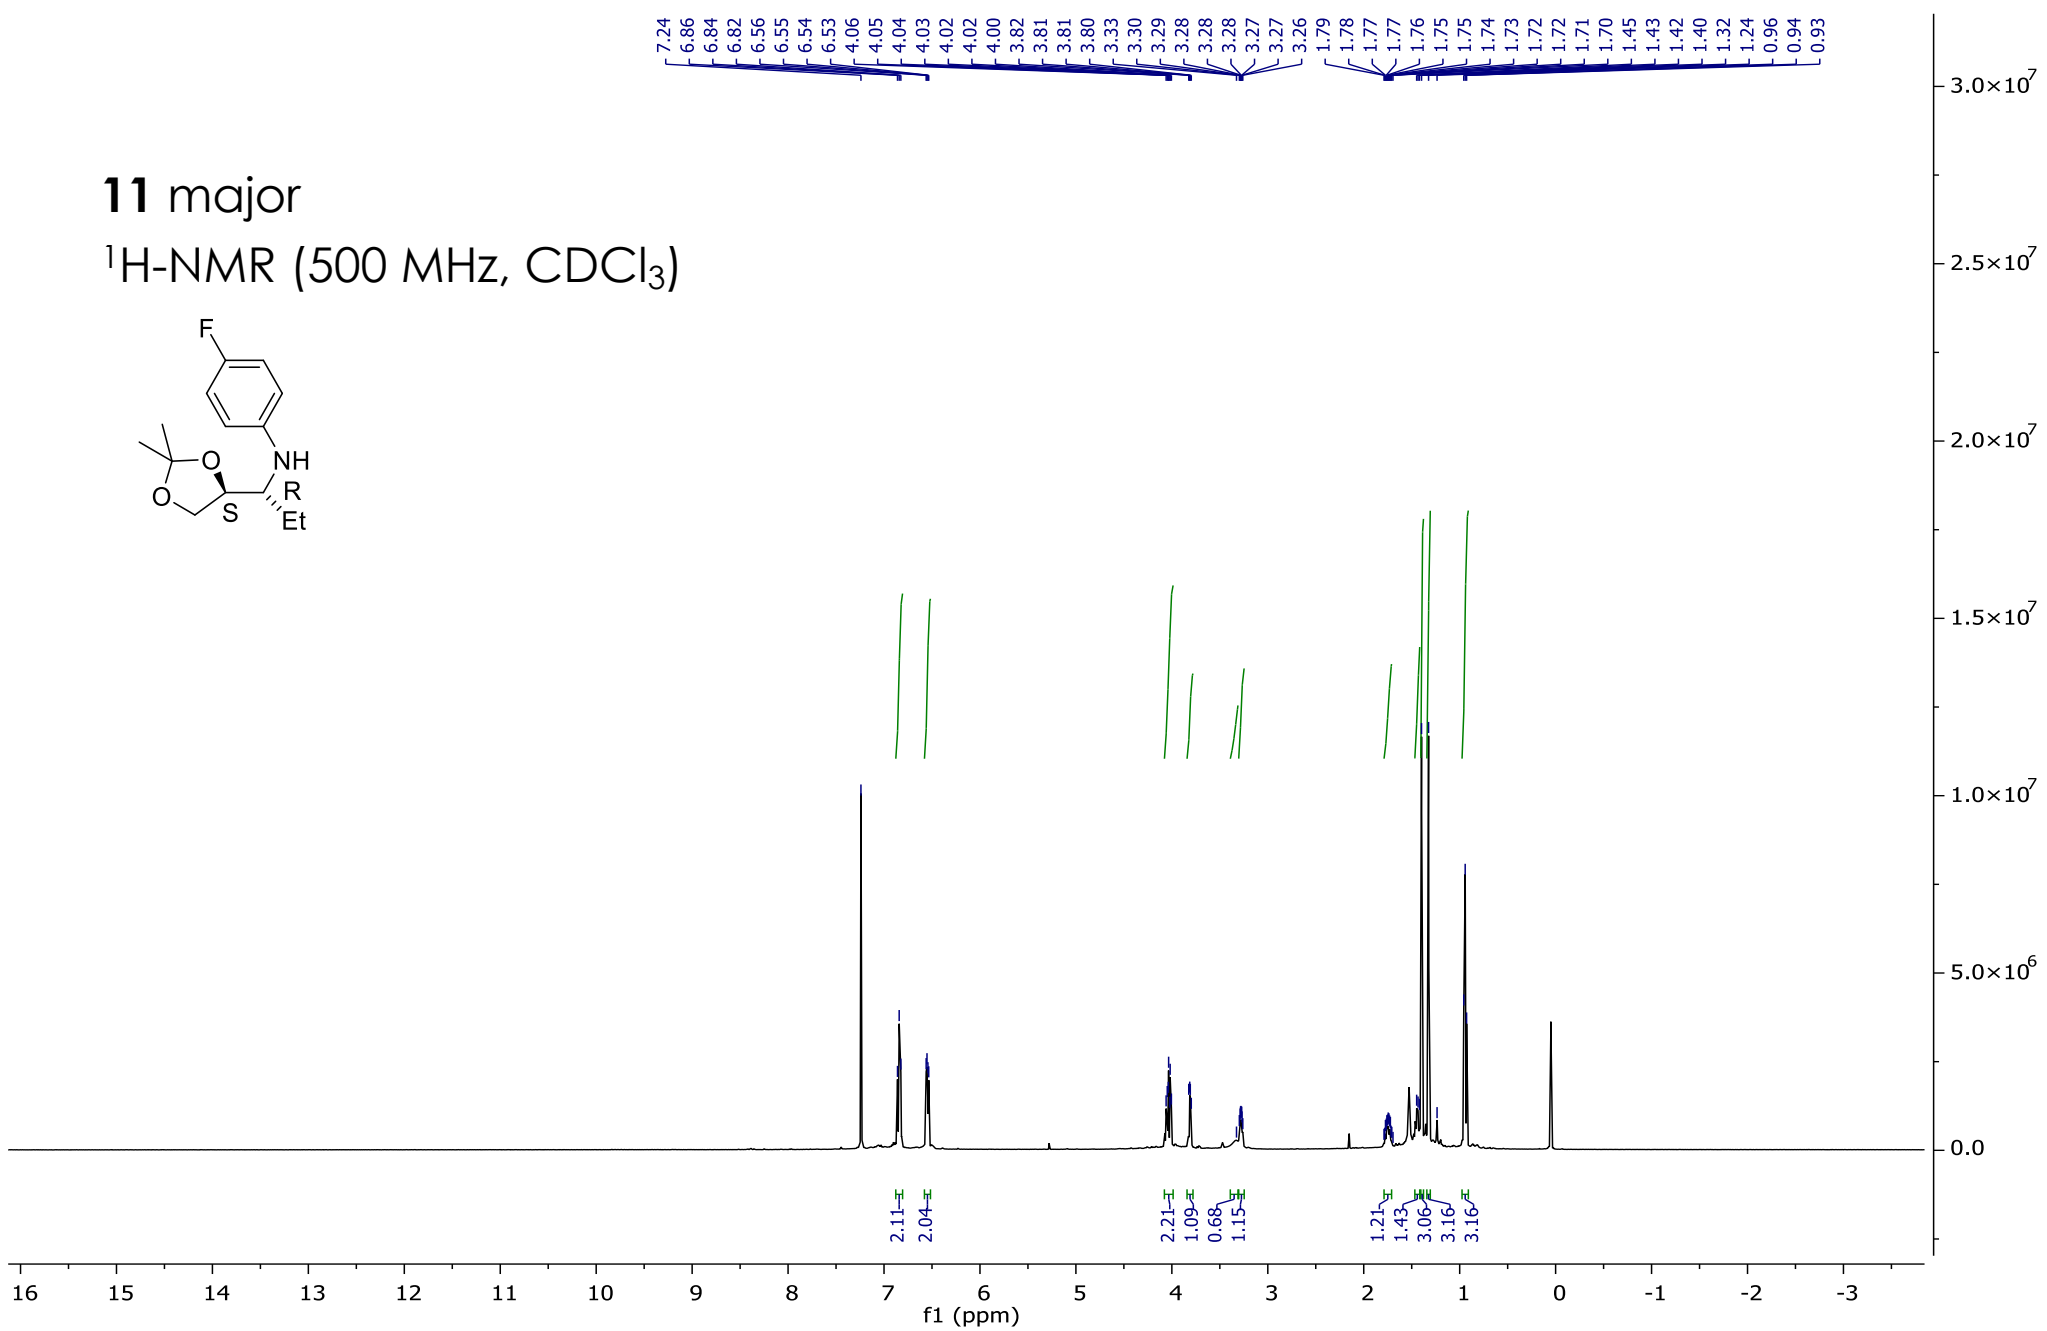

<sup>1</sup>H NMR (500 MHz, CDCl<sub>3</sub>) of compound **11** major diastereomer

**11** major

$^{13}\text{C}$ -NMR (126 MHz,  $\text{CDCl}_3$ )

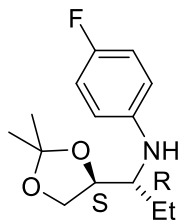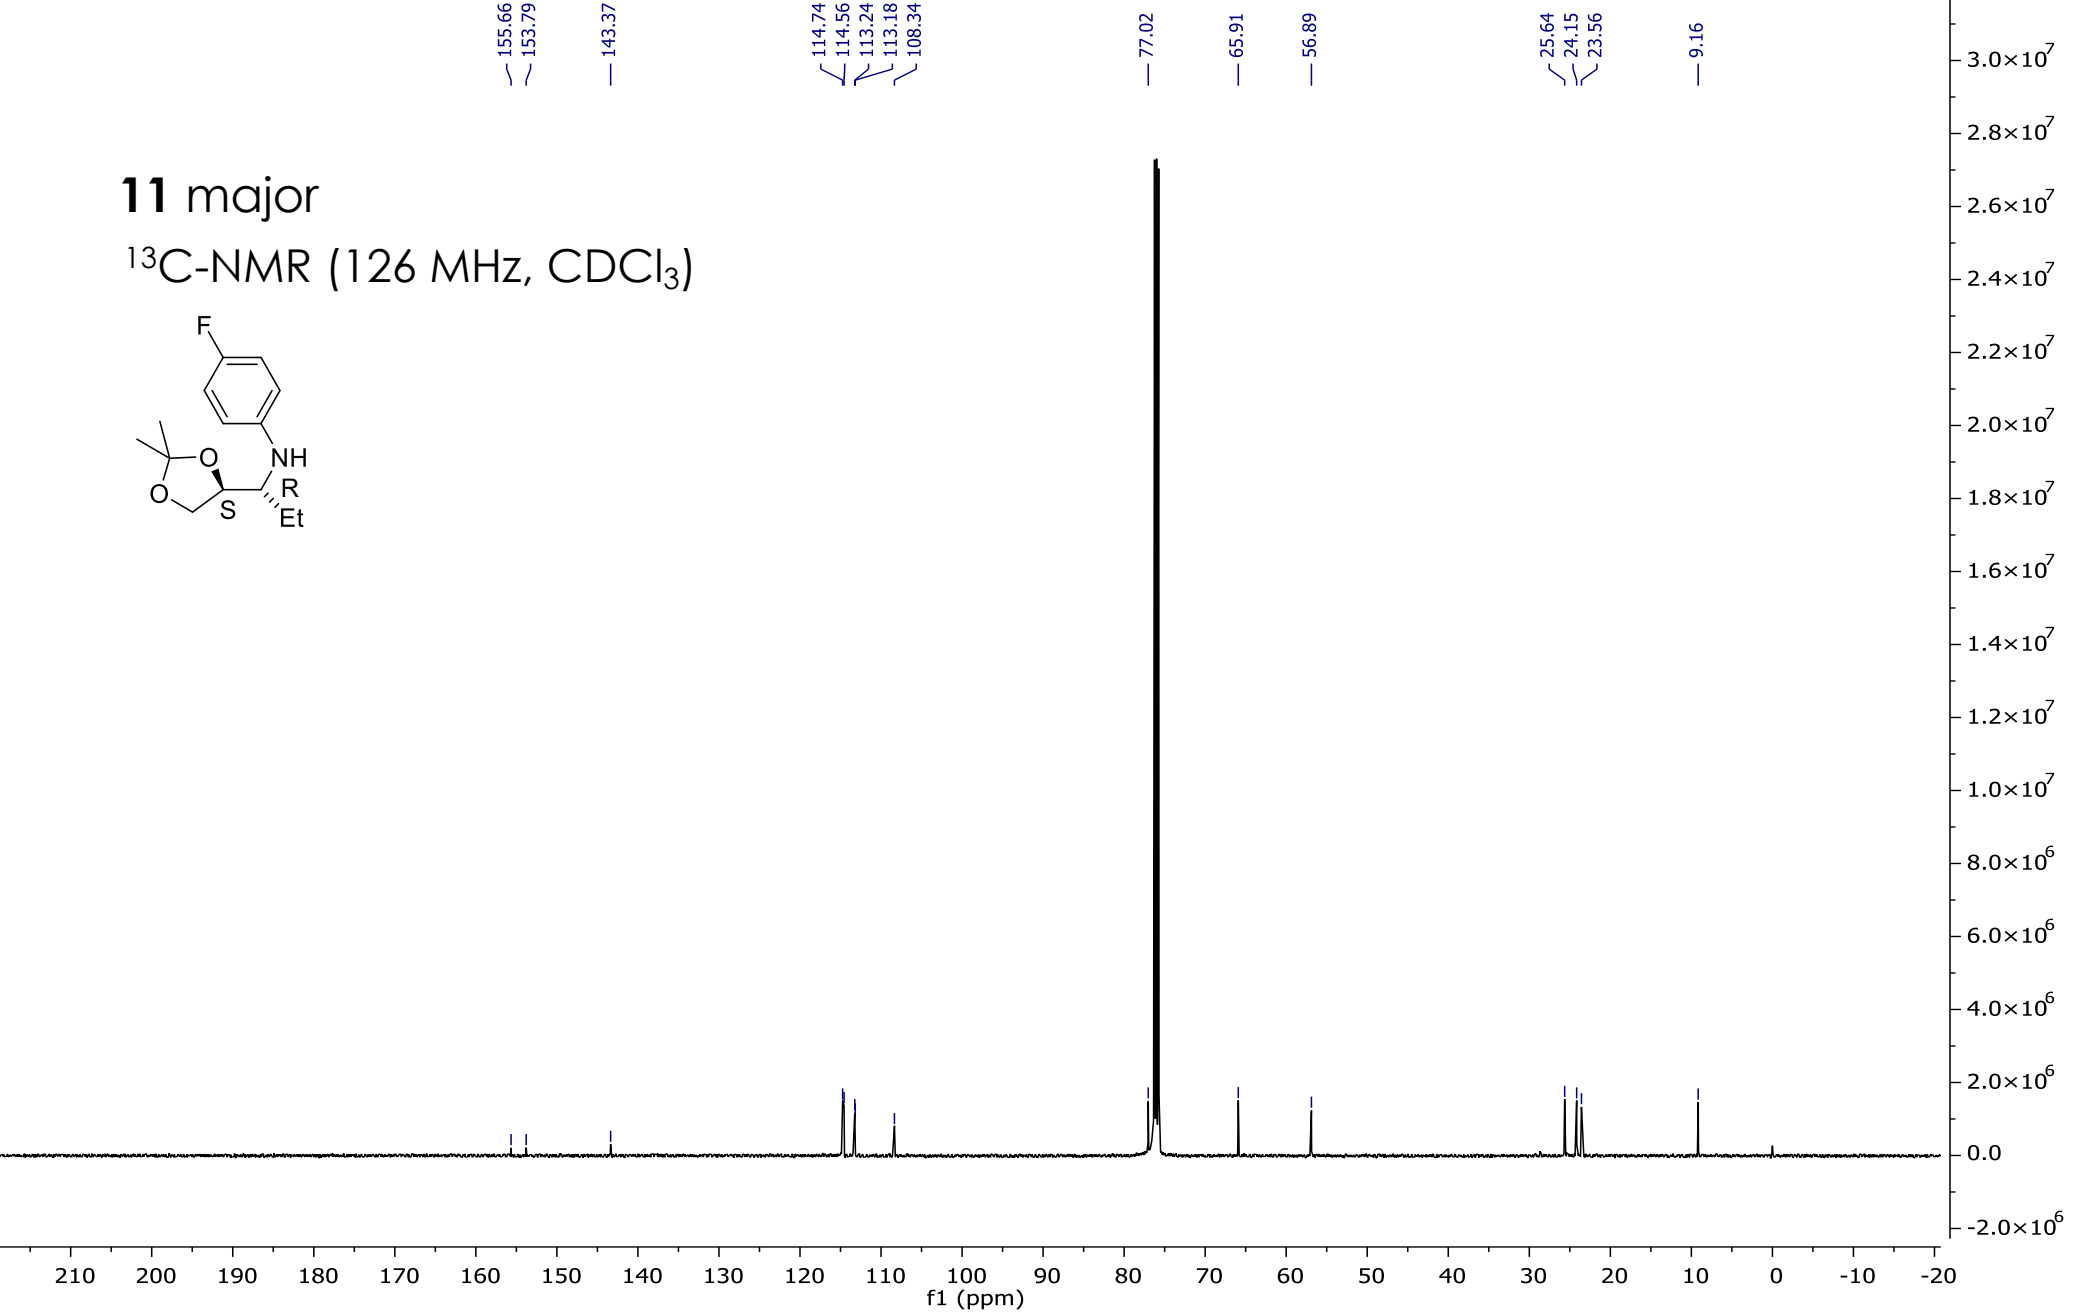

$^{13}\text{C}$  NMR (126 MHz,  $\text{CDCl}_3$ ) of compound **11** major diastereomer

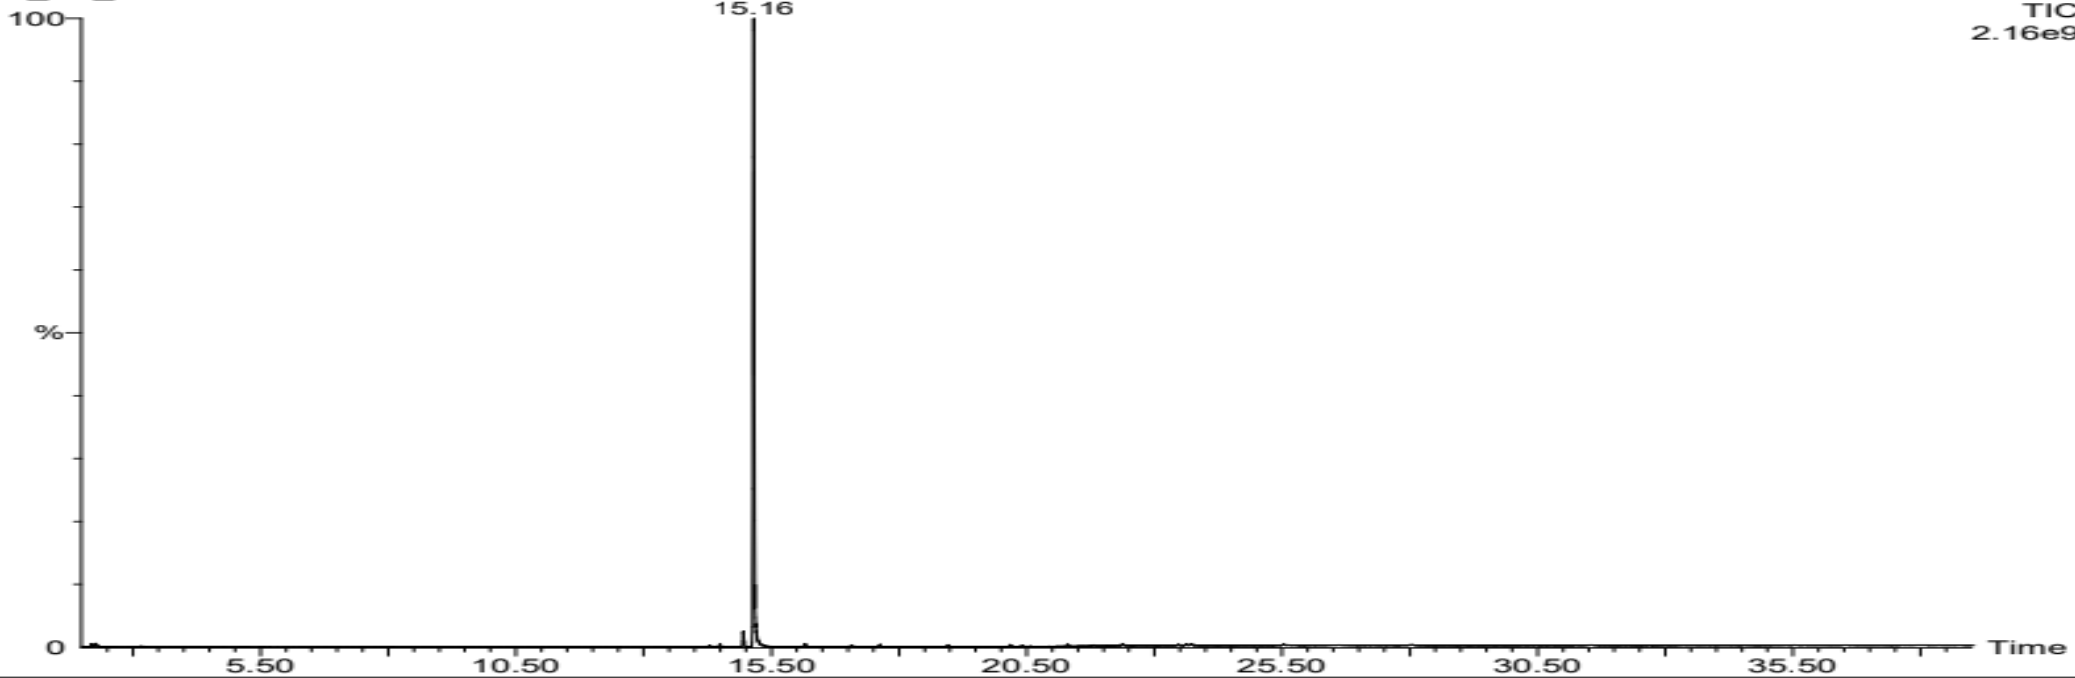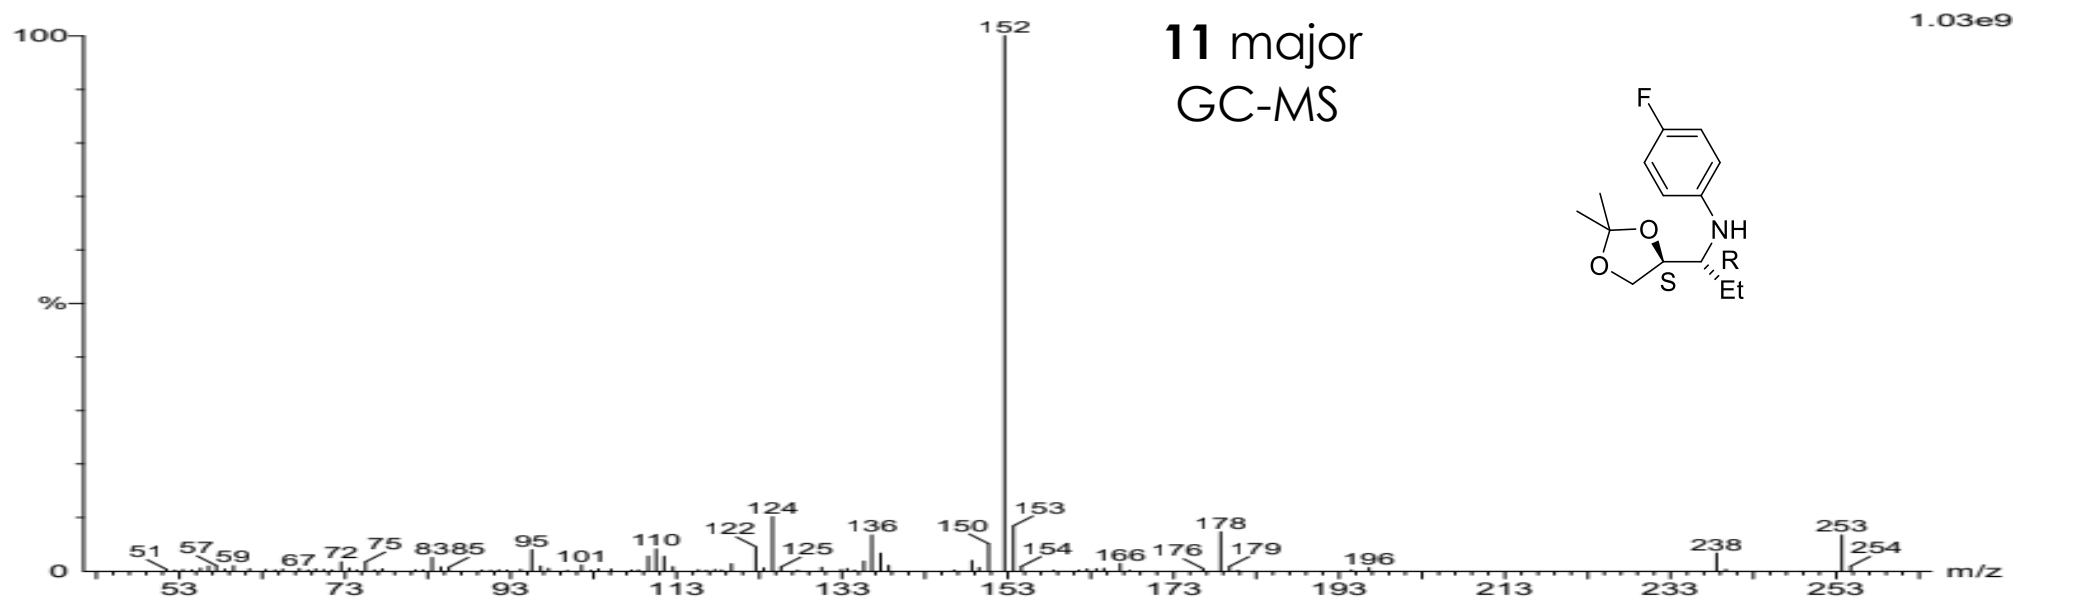

GC-MS of compound **11** major diastereomer



$^1\text{H}$  NMR (500 MHz,  $\text{CDCl}_3$ )

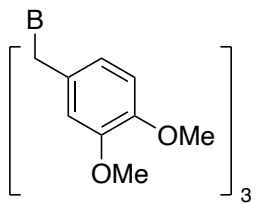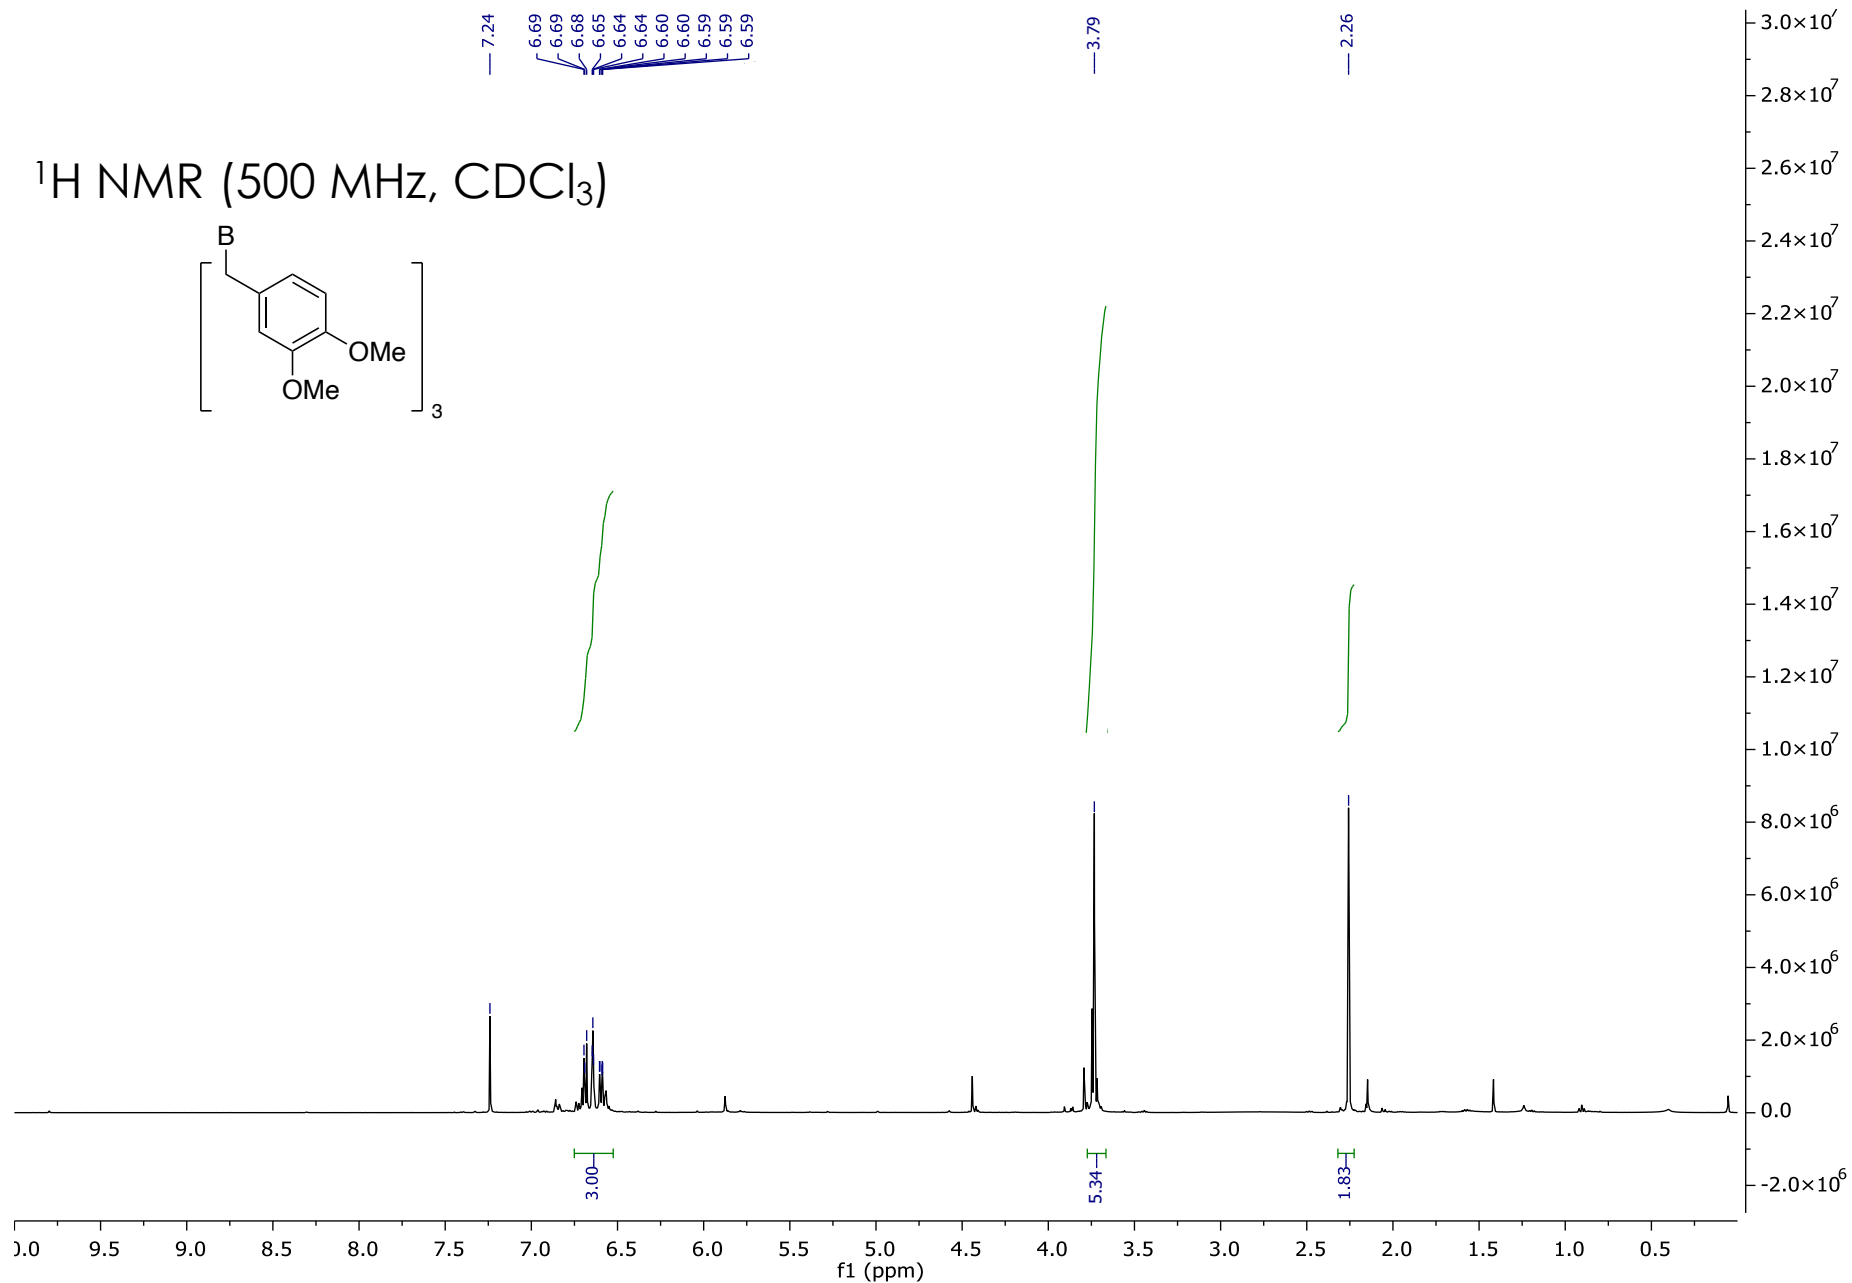

$^1\text{H}$  NMR (500 MHz,  $\text{CDCl}_3$ ) of borane **20**

(±) Romneine  
<sup>1</sup>H NMR (500 MHz, CDCl<sub>3</sub>)

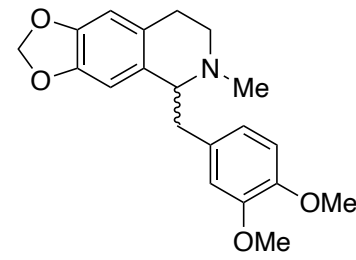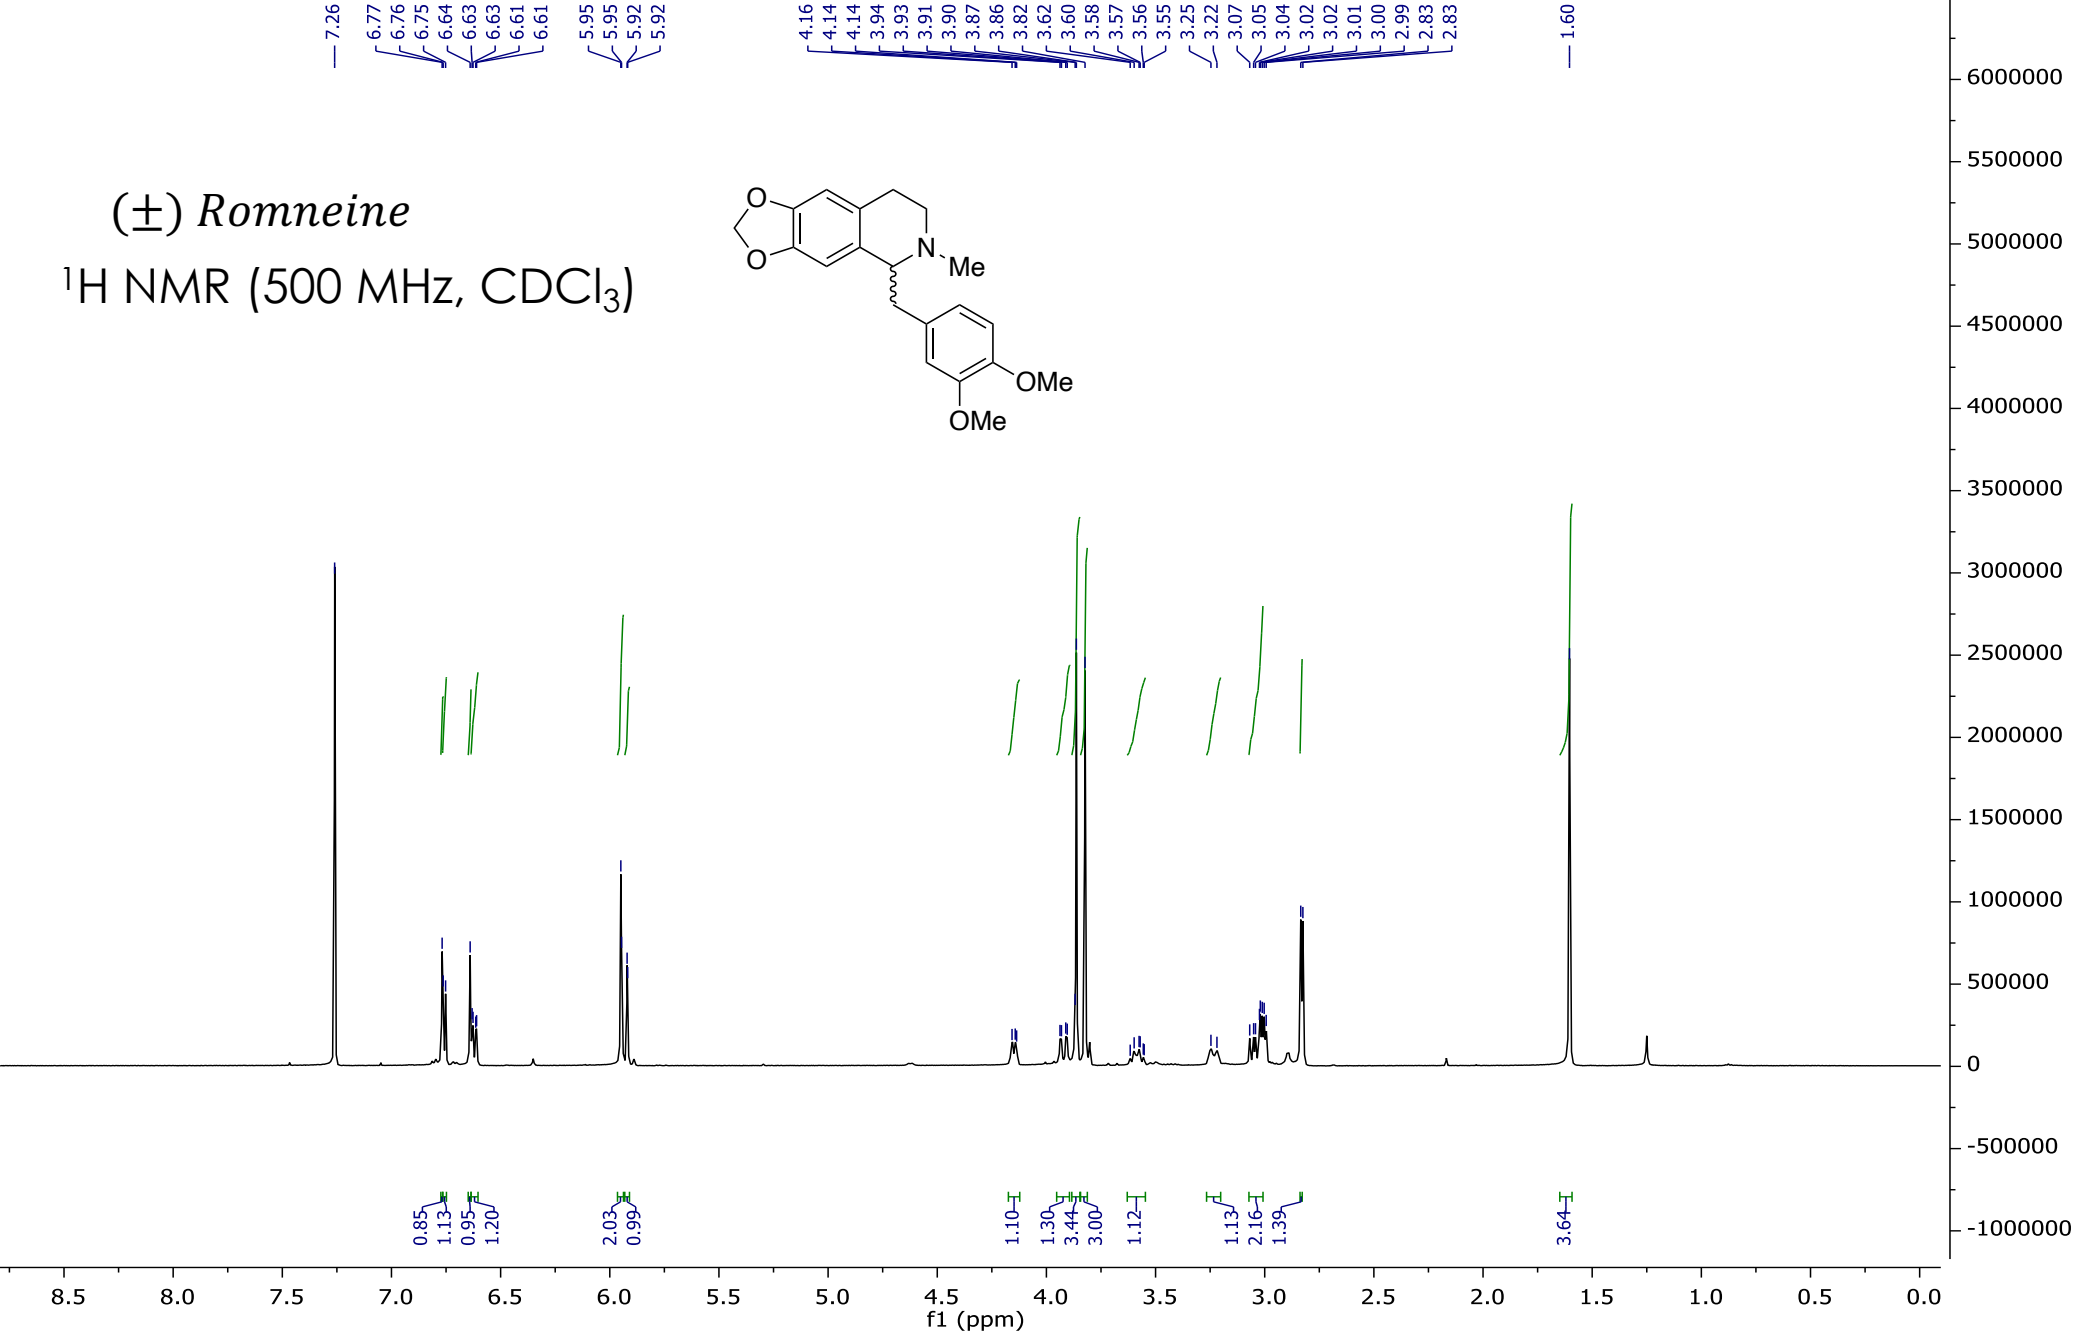

<sup>1</sup>H NMR (500 MHz, CDCl<sub>3</sub>) of (±)-Romneine

(±) *Romneine*  
<sup>13</sup>C-NMR (126 MHz, CDCl<sub>3</sub>)

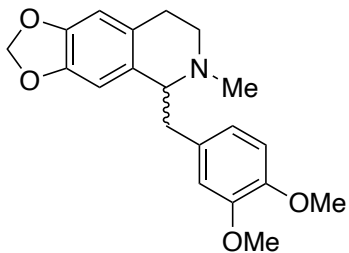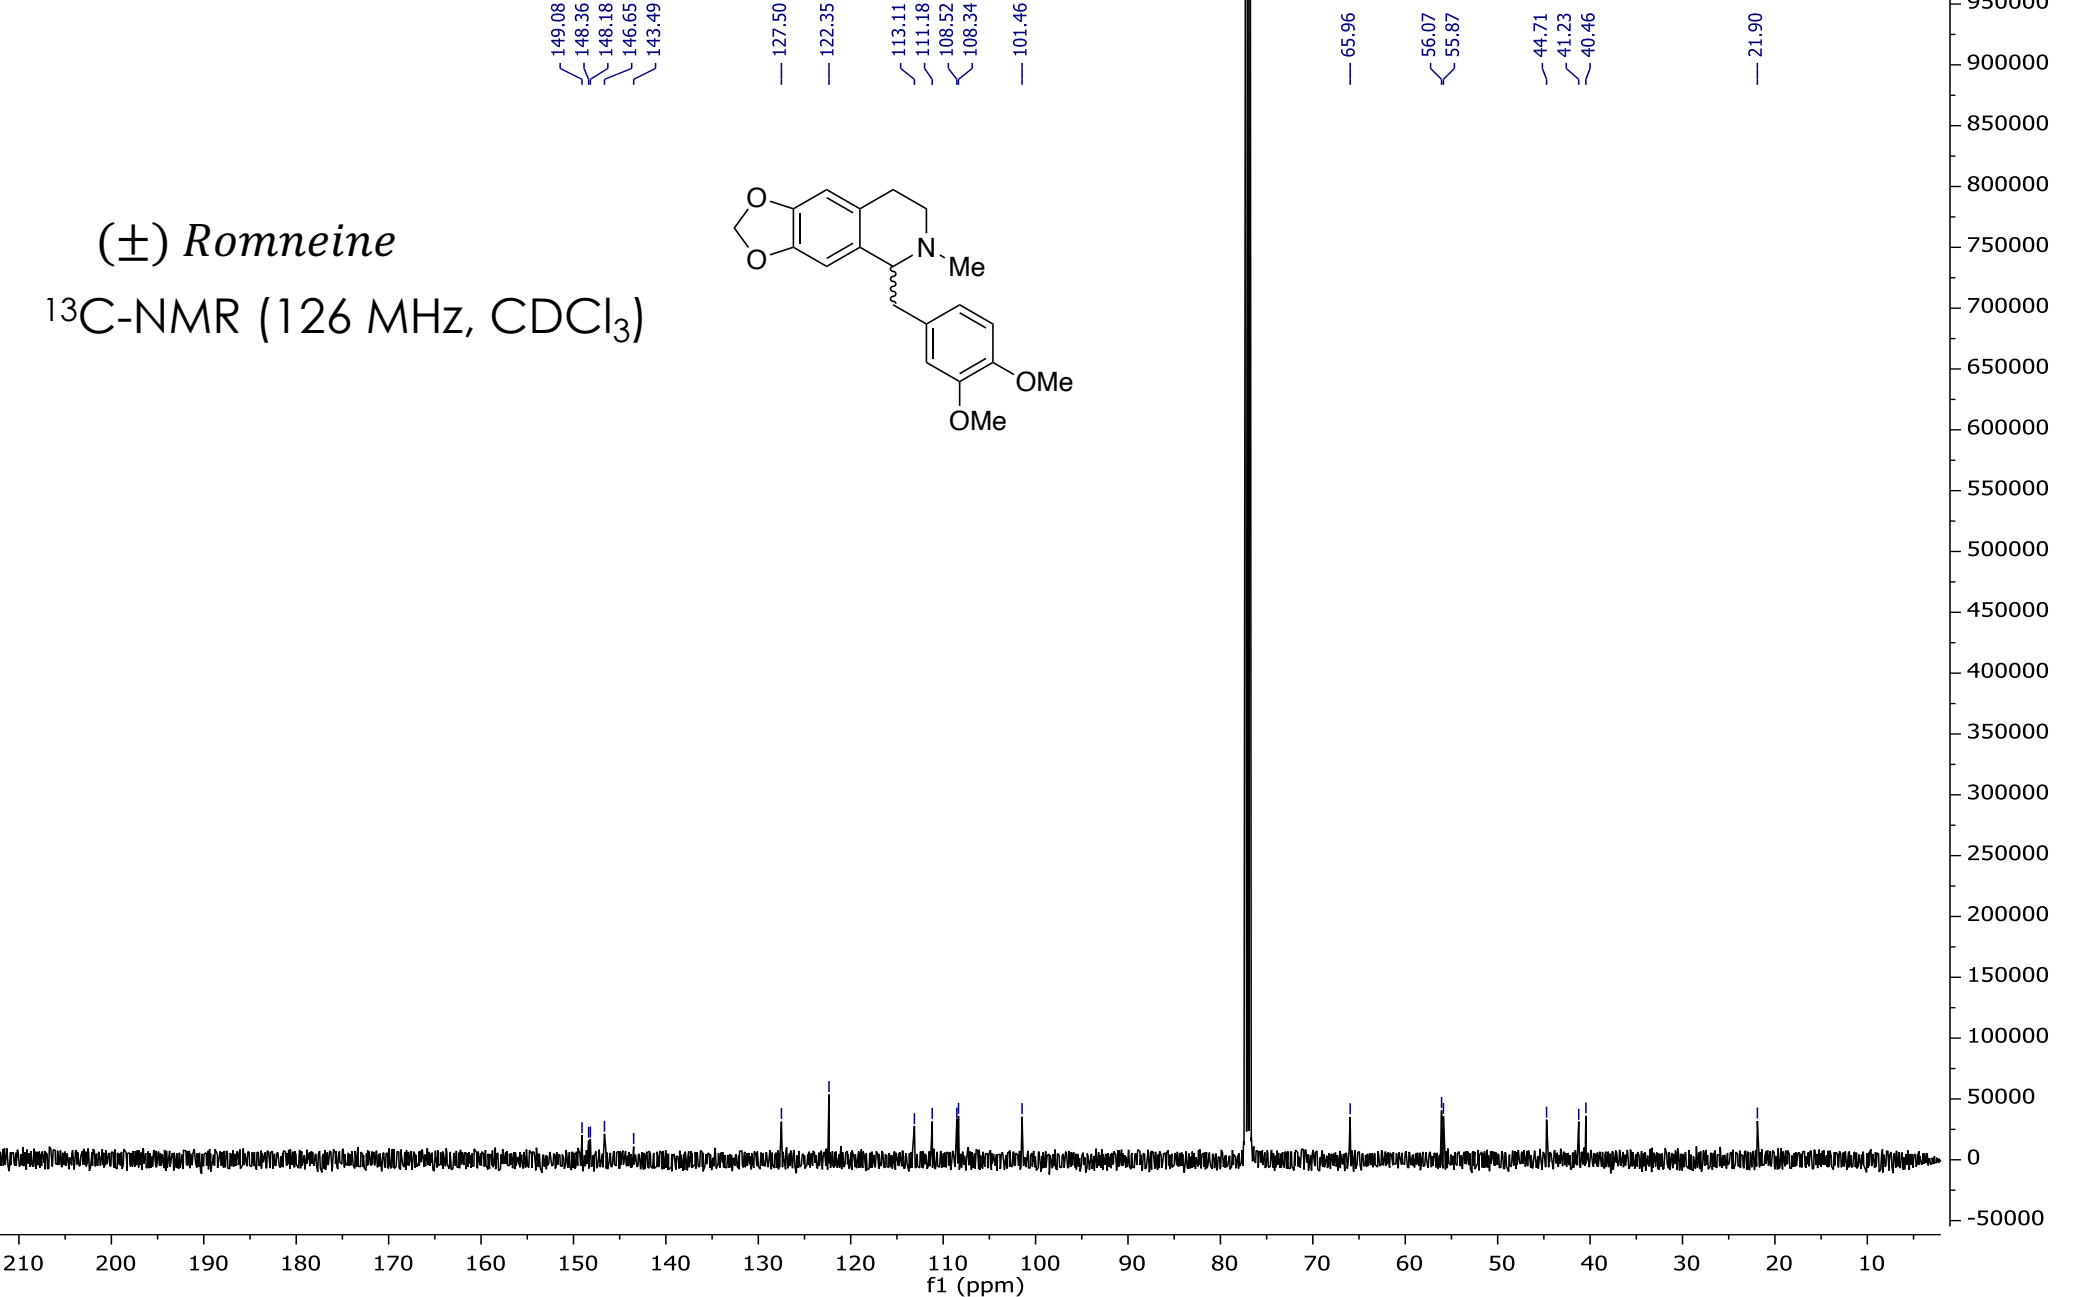

<sup>13</sup>C NMR (126 MHz, CDCl<sub>3</sub>) of (±)-Romneine

(±) Romneine

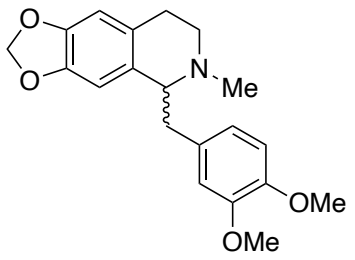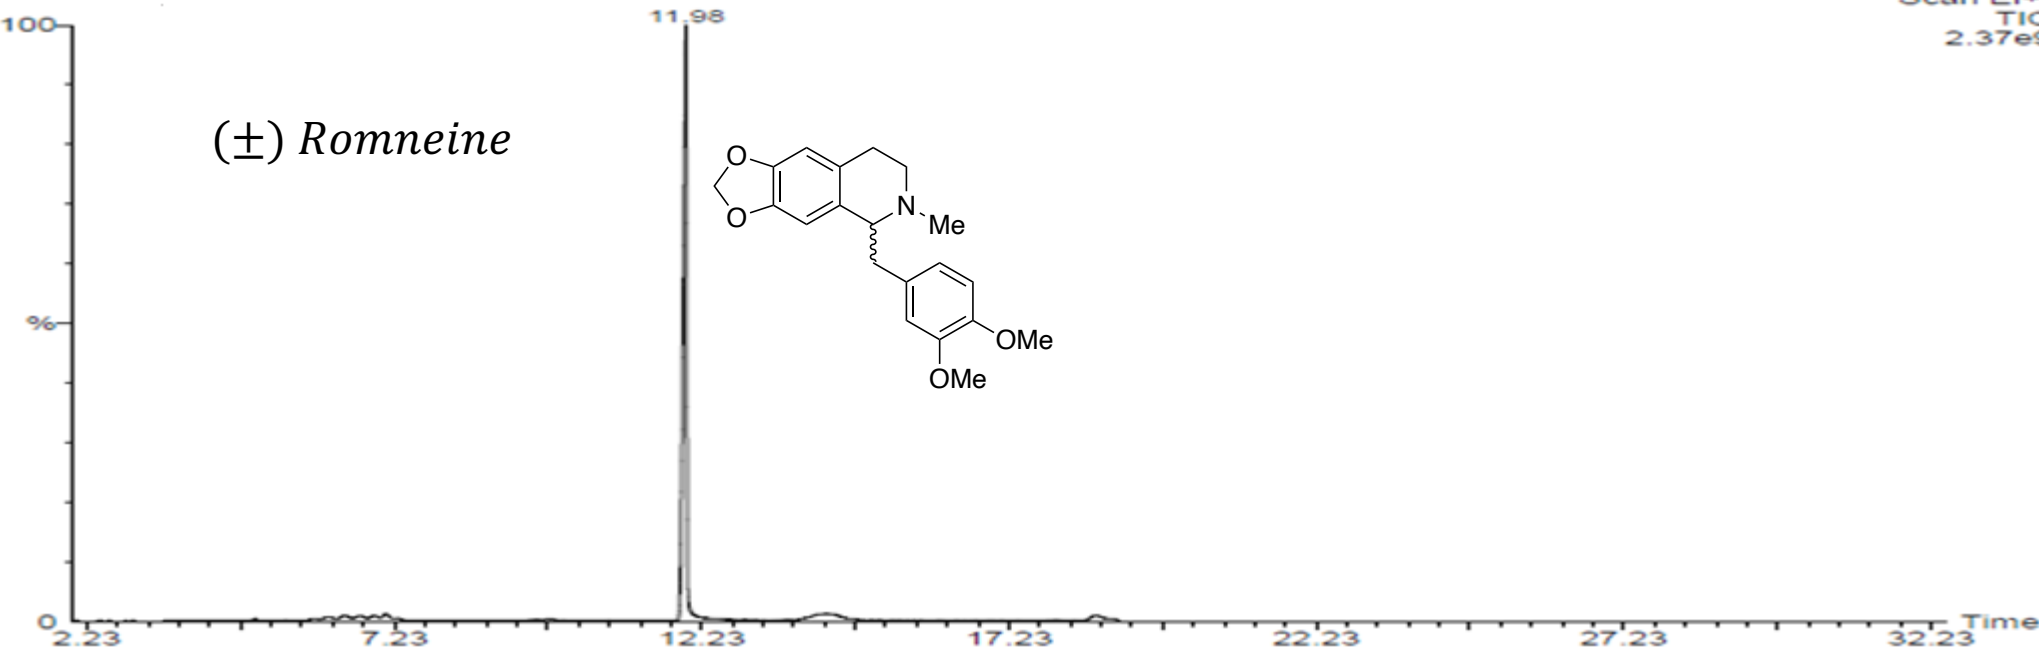

, 16-Feb-2023 + 13:54:44

GC-MS  
(±) Romneine

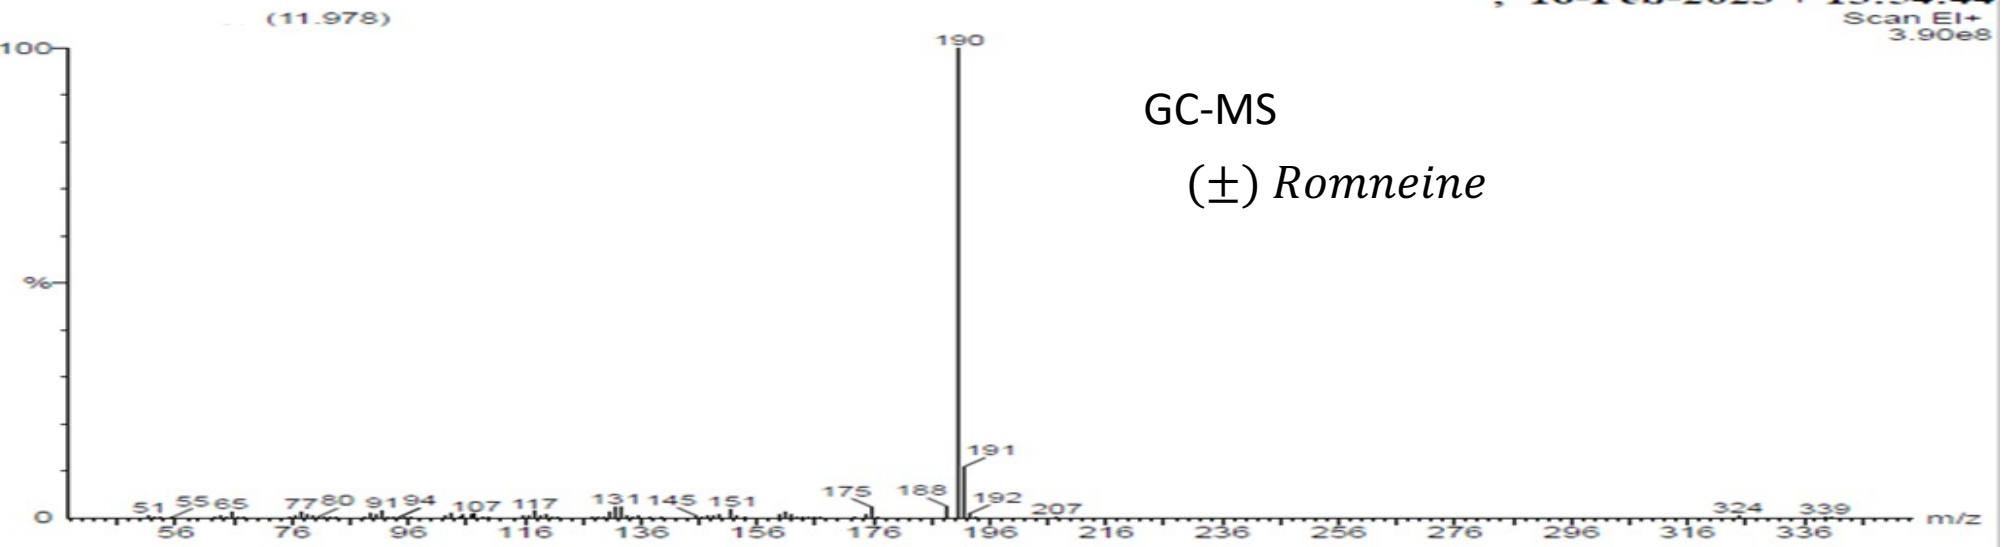

GC-MS of (±)-Romneine
